# Supplementary material for: Impact of β-perfluoroalkyl substitution of proline on the proteolytic stability of its peptide derivatives
Source: Royal Society of Chemistry journal article supplement (doi:10.1039/d2ob01430k), 2022-01-01

## Impact of $\beta$ -Perfluoroalkyl Substitution of Proline on the Proteolytic Stability of Its Amide Derivatives (Supporting Information)

Anton V. Chernykh, Danylo Aloshyn, Yuliya O. Kuchkovska, Constantin G. Daniliuc, Nataliya A. Tolmachova, Ivan S. Kondratov,\* Sergey Zozulya, Oleksandr O. Grygorenko,\* and Günter Haufe

\* Corresponding authors. E-mail: [kondratov@enamline.net](mailto:kondratov@enamline.net) (I.S.K.), [gregor@univ.kiev.ua](mailto:gregor@univ.kiev.ua) (O.O.G.)

### Table of contents

|                                                                                                              |     |
|--------------------------------------------------------------------------------------------------------------|-----|
| $^1\text{H}$ NMR spectrum of the compound (2 <i>S</i> ,3 <i>S</i> )- <b>5a</b> (in $\text{CDCl}_3$ ).....    | S4  |
| $^{13}\text{C}$ NMR spectrum of the compound (2 <i>S</i> ,3 <i>S</i> )- <b>5a</b> (in $\text{CDCl}_3$ )..... | S5  |
| $^{19}\text{F}$ NMR spectrum of the compound (2 <i>S</i> ,3 <i>S</i> )- <b>5a</b> (in $\text{CDCl}_3$ )..... | S6  |
| $^1\text{H}$ NMR spectrum of the compound (2 <i>R</i> ,3 <i>R</i> )- <b>5a</b> (in $\text{CDCl}_3$ ).....    | S7  |
| $^{13}\text{C}$ NMR spectrum of the compound (2 <i>R</i> ,3 <i>R</i> )- <b>5a</b> (in $\text{CDCl}_3$ )..... | S8  |
| $^{19}\text{F}$ NMR spectrum of the compound (2 <i>R</i> ,3 <i>R</i> )- <b>5a</b> (in $\text{CDCl}_3$ )..... | S9  |
| $^1\text{H}$ NMR spectrum of the compound (2 <i>S</i> ,3 <i>S</i> )- <b>5b</b> (in $\text{CDCl}_3$ ).....    | S10 |
| $^{13}\text{C}$ NMR spectrum of the compound (2 <i>S</i> ,3 <i>S</i> )- <b>5b</b> (in $\text{CDCl}_3$ )..... | S11 |
| $^{19}\text{F}$ NMR spectrum of the compound (2 <i>S</i> ,3 <i>S</i> )- <b>5b</b> (in $\text{CDCl}_3$ )..... | S12 |
| $^1\text{H}$ NMR spectrum of the compound (2 <i>R</i> ,3 <i>R</i> )- <b>5b</b> (in $\text{CDCl}_3$ ).....    | S13 |
| $^{13}\text{C}$ NMR spectrum of the compound (2 <i>R</i> ,3 <i>R</i> )- <b>5b</b> (in $\text{CDCl}_3$ )..... | S14 |
| $^{19}\text{F}$ NMR spectrum of the compound (2 <i>R</i> ,3 <i>R</i> )- <b>5b</b> (in $\text{CDCl}_3$ )..... | S15 |
| $^1\text{H}$ NMR spectrum of the compound (2 <i>S</i> ,3 <i>R</i> )- <b>5a</b> (in $\text{CDCl}_3$ ).....    | S16 |
| $^{13}\text{C}$ NMR spectrum of the compound (2 <i>S</i> ,3 <i>R</i> )- <b>5a</b> (in $\text{CDCl}_3$ )..... | S17 |
| $^{19}\text{F}$ NMR spectrum of the compound (2 <i>S</i> ,3 <i>R</i> )- <b>5a</b> (in $\text{CDCl}_3$ )..... | S18 |
| $^1\text{H}$ NMR spectrum of the compound (2 <i>R</i> ,3 <i>S</i> )- <b>5a</b> (in $\text{CDCl}_3$ ).....    | S19 |
| $^{13}\text{C}$ NMR spectrum of the compound (2 <i>R</i> ,3 <i>S</i> )- <b>5a</b> (in $\text{CDCl}_3$ )..... | S20 |
| $^{19}\text{F}$ NMR spectrum of the compound (2 <i>R</i> ,3 <i>S</i> )- <b>5a</b> (in $\text{CDCl}_3$ )..... | S21 |
| $^1\text{H}$ NMR spectrum of the compound (2 <i>S</i> ,3 <i>R</i> )- <b>5b</b> (in $\text{CDCl}_3$ ).....    | S22 |
| $^{13}\text{C}$ NMR spectrum of the compound (2 <i>S</i> ,3 <i>R</i> )- <b>5b</b> (in $\text{CDCl}_3$ )..... | S23 |
| $^{19}\text{F}$ NMR spectrum of the compound (2 <i>S</i> ,3 <i>R</i> )- <b>5b</b> (in $\text{CDCl}_3$ )..... | S24 |
| $^1\text{H}$ NMR spectrum of the compound (2 <i>R</i> ,3 <i>S</i> )- <b>5b</b> (in $\text{CDCl}_3$ ).....    | S25 |
| $^{13}\text{C}$ NMR spectrum of the compound (2 <i>R</i> ,3 <i>S</i> )- <b>5b</b> (in $\text{CDCl}_3$ )..... | S26 |
| $^{19}\text{F}$ NMR spectrum of the compound (2 <i>R</i> ,3 <i>S</i> )- <b>5b</b> (in $\text{CDCl}_3$ )..... | S27 |
| $^1\text{H}$ NMR spectrum of the compound (2 <i>S</i> ,3 <i>S</i> )- <b>6a</b> (in $\text{CDCl}_3$ ).....    | S28 |
| $^{13}\text{C}$ NMR spectrum of the compound (2 <i>S</i> ,3 <i>S</i> )- <b>6a</b> (in $\text{CDCl}_3$ )..... | S29 |
| $^{19}\text{F}$ NMR spectrum of the compound (2 <i>S</i> ,3 <i>S</i> )- <b>6a</b> (in $\text{CDCl}_3$ )..... | S30 |
| $^1\text{H}$ NMR spectrum of the compound (2 <i>R</i> ,3 <i>R</i> )- <b>6a</b> (in $\text{CDCl}_3$ ).....    | S31 |
| $^{13}\text{C}$ NMR spectrum of the compound (2 <i>R</i> ,3 <i>R</i> )- <b>6a</b> (in $\text{CDCl}_3$ )..... | S32 |
| $^{19}\text{F}$ NMR spectrum of the compound (2 <i>R</i> ,3 <i>R</i> )- <b>6a</b> (in $\text{CDCl}_3$ )..... | S33 |
| $^1\text{H}$ NMR spectrum of the compound (2 <i>S</i> ,3 <i>S</i> )- <b>6b</b> (in $\text{CDCl}_3$ ).....    | S34 |

|                                                                                                                |     |
|----------------------------------------------------------------------------------------------------------------|-----|
| <sup>13</sup> C NMR spectrum of the compound (2 <i>S</i> ,3 <i>S</i> )- <b>6b</b> (in CDCl <sub>3</sub> )..... | S35 |
| <sup>19</sup> F NMR spectrum of the compound (2 <i>S</i> ,3 <i>S</i> )- <b>6b</b> (in CDCl <sub>3</sub> )..... | S36 |
| <sup>1</sup> H NMR spectrum of the compound (2 <i>R</i> ,3 <i>R</i> )- <b>6b</b> (in CDCl <sub>3</sub> ).....  | S37 |
| <sup>13</sup> C NMR spectrum of the compound (2 <i>R</i> ,3 <i>R</i> )- <b>6b</b> (in CDCl <sub>3</sub> )..... | S38 |
| <sup>19</sup> F NMR spectrum of the compound (2 <i>R</i> ,3 <i>R</i> )- <b>6b</b> (in CDCl <sub>3</sub> )..... | S39 |
| <sup>1</sup> H NMR spectrum of the compound (2 <i>S</i> ,3 <i>R</i> )- <b>6a</b> (in CDCl <sub>3</sub> ).....  | S40 |
| <sup>13</sup> C NMR spectrum of the compound (2 <i>S</i> ,3 <i>R</i> )- <b>6a</b> (in CDCl <sub>3</sub> )..... | S41 |
| <sup>19</sup> F NMR spectrum of the compound (2 <i>S</i> ,3 <i>R</i> )- <b>6a</b> (in CDCl <sub>3</sub> )..... | S42 |
| <sup>1</sup> H NMR spectrum of the compound (2 <i>R</i> ,3 <i>S</i> )- <b>6a</b> (in CDCl <sub>3</sub> ).....  | S43 |
| <sup>13</sup> C NMR spectrum of the compound (2 <i>R</i> ,3 <i>S</i> )- <b>6a</b> (in CDCl <sub>3</sub> )..... | S44 |
| <sup>19</sup> F NMR spectrum of the compound (2 <i>R</i> ,3 <i>S</i> )- <b>6a</b> (in CDCl <sub>3</sub> )..... | S45 |
| <sup>1</sup> H NMR spectrum of the compound (2 <i>S</i> ,3 <i>R</i> )- <b>6b</b> (in CDCl <sub>3</sub> ).....  | S46 |
| <sup>13</sup> C NMR spectrum of the compound (2 <i>S</i> ,3 <i>R</i> )- <b>6b</b> (in CDCl <sub>3</sub> )..... | S47 |
| <sup>19</sup> F NMR spectrum of the compound (2 <i>S</i> ,3 <i>R</i> )- <b>6b</b> (in CDCl <sub>3</sub> )..... | S49 |
| <sup>1</sup> H NMR spectrum of the compound (2 <i>R</i> ,3 <i>S</i> )- <b>6b</b> (in CDCl <sub>3</sub> ).....  | S50 |
| <sup>13</sup> C NMR spectrum of the compound (2 <i>R</i> ,3 <i>S</i> )- <b>6b</b> (in CDCl <sub>3</sub> )..... | S51 |
| <sup>19</sup> F NMR spectrum of the compound (2 <i>R</i> ,3 <i>S</i> )- <b>6b</b> (in CDCl <sub>3</sub> )..... | S53 |
| <sup>1</sup> H NMR spectrum of the compound (2 <i>S</i> ,3 <i>S</i> )- <b>2a</b> (in D <sub>2</sub> O).....    | S54 |
| <sup>13</sup> C NMR spectrum of the compound (2 <i>S</i> ,3 <i>S</i> )- <b>2a</b> (in D <sub>2</sub> O).....   | S55 |
| <sup>19</sup> F NMR spectrum of the compound (2 <i>S</i> ,3 <i>S</i> )- <b>2a</b> (in D <sub>2</sub> O).....   | S56 |
| <sup>1</sup> H NMR spectrum of the compound (2 <i>R</i> ,3 <i>R</i> )- <b>2a</b> (in D <sub>2</sub> O).....    | S57 |
| <sup>13</sup> C NMR spectrum of the compound (2 <i>R</i> ,3 <i>R</i> )- <b>2a</b> (in D <sub>2</sub> O).....   | S58 |
| <sup>19</sup> F NMR spectrum of the compound (2 <i>R</i> ,3 <i>R</i> )- <b>2a</b> (in D <sub>2</sub> O).....   | S59 |
| <sup>1</sup> H NMR spectrum of the compound (2 <i>S</i> ,3 <i>S</i> )- <b>2b</b> (in D <sub>2</sub> O).....    | S60 |
| <sup>13</sup> C NMR spectrum of the compound (2 <i>S</i> ,3 <i>S</i> )- <b>2b</b> (in D <sub>2</sub> O).....   | S61 |
| <sup>19</sup> F NMR spectrum of the compound (2 <i>S</i> ,3 <i>S</i> )- <b>2b</b> (in D <sub>2</sub> O).....   | S62 |
| <sup>1</sup> H NMR spectrum of the compound (2 <i>R</i> ,3 <i>R</i> )- <b>2b</b> (in D <sub>2</sub> O).....    | S63 |
| <sup>13</sup> C NMR spectrum of the compound (2 <i>R</i> ,3 <i>R</i> )- <b>2b</b> (in D <sub>2</sub> O).....   | S64 |
| <sup>19</sup> F NMR spectrum of the compound (2 <i>R</i> ,3 <i>R</i> )- <b>2b</b> (in D <sub>2</sub> O).....   | S65 |
| <sup>1</sup> H NMR spectrum of the compound (2 <i>S</i> ,3 <i>R</i> )- <b>2a</b> (in D <sub>2</sub> O).....    | S66 |
| <sup>13</sup> C NMR spectrum of the compound (2 <i>S</i> ,3 <i>R</i> )- <b>2a</b> (in D <sub>2</sub> O).....   | S67 |
| <sup>19</sup> F NMR spectrum of the compound (2 <i>S</i> ,3 <i>R</i> )- <b>2a</b> (in D <sub>2</sub> O).....   | S68 |
| <sup>1</sup> H NMR spectrum of the compound (2 <i>R</i> ,3 <i>S</i> )- <b>2a</b> (in D <sub>2</sub> O).....    | S69 |
| <sup>13</sup> C NMR spectrum of the compound (2 <i>R</i> ,3 <i>S</i> )- <b>2a</b> (in D <sub>2</sub> O).....   | S70 |
| <sup>19</sup> F NMR spectrum of the compound (2 <i>R</i> ,3 <i>S</i> )- <b>2a</b> (in D <sub>2</sub> O).....   | S71 |
| <sup>1</sup> H NMR spectrum of the compound (2 <i>S</i> ,3 <i>R</i> )- <b>2b</b> (in D <sub>2</sub> O).....    | S72 |
| <sup>13</sup> C NMR spectrum of the compound (2 <i>S</i> ,3 <i>R</i> )- <b>2b</b> (in D <sub>2</sub> O).....   | S73 |
| <sup>19</sup> F NMR spectrum of the compound (2 <i>S</i> ,3 <i>R</i> )- <b>2b</b> (in D <sub>2</sub> O).....   | S74 |
| <sup>1</sup> H NMR spectrum of the compound (2 <i>R</i> ,3 <i>S</i> )- <b>2b</b> (in D <sub>2</sub> O).....    | S75 |

|                                                                                                                |     |
|----------------------------------------------------------------------------------------------------------------|-----|
| <sup>13</sup> C NMR spectrum of the compound (2 <i>R</i> ,3 <i>S</i> )- <b>2b</b> (in D <sub>2</sub> O). ..... | S76 |
| <sup>19</sup> F NMR spectrum of the compound (2 <i>R</i> ,3 <i>S</i> )- <b>2b</b> (in D <sub>2</sub> O).....   | S77 |

<sup>1</sup>H NMR spectrum of the compound (2*S*,3*S*)-**5a** (in CDCl<sub>3</sub>).

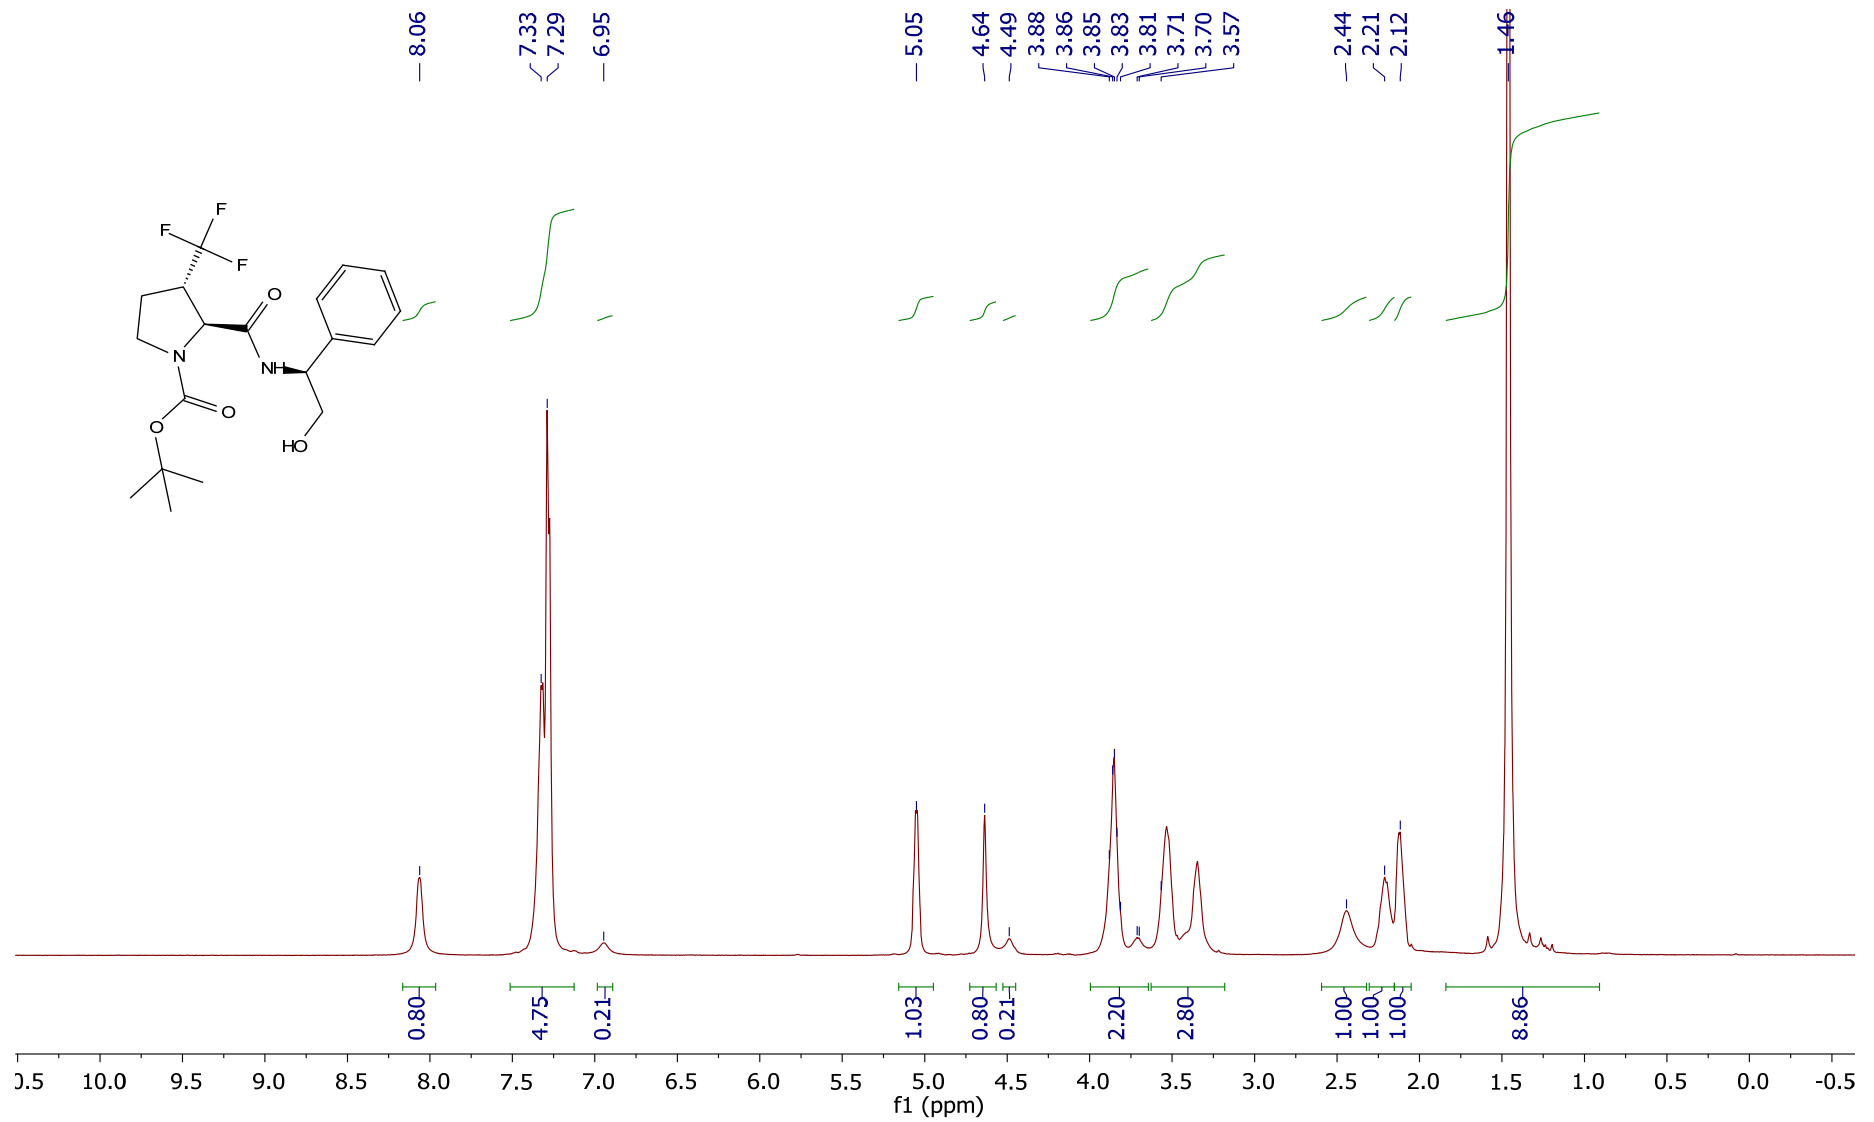

$^{13}\text{C}$  NMR spectrum of the compound (2*S*,3*S*)-**5a** (in  $\text{CDCl}_3$ ).

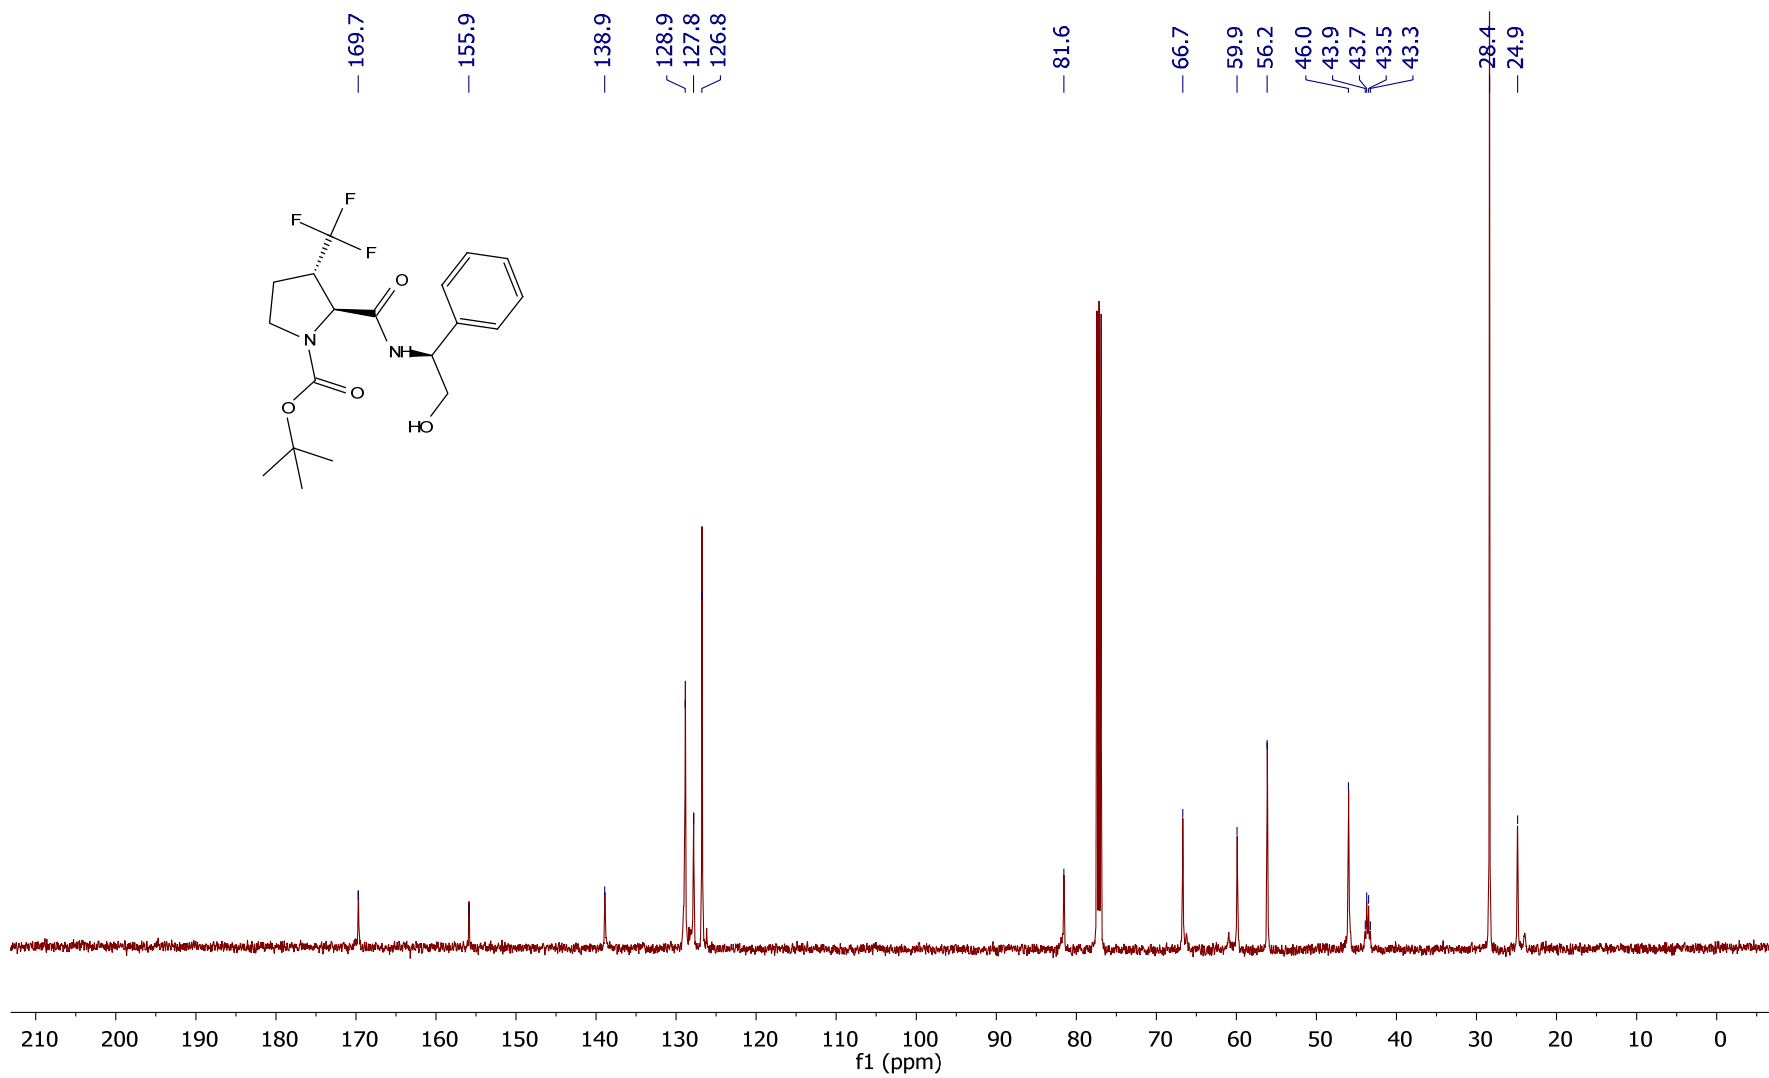

$^{19}\text{F}$  NMR spectrum of the compound (2*S*,3*S*)-**5a** (in  $\text{CDCl}_3$ ).

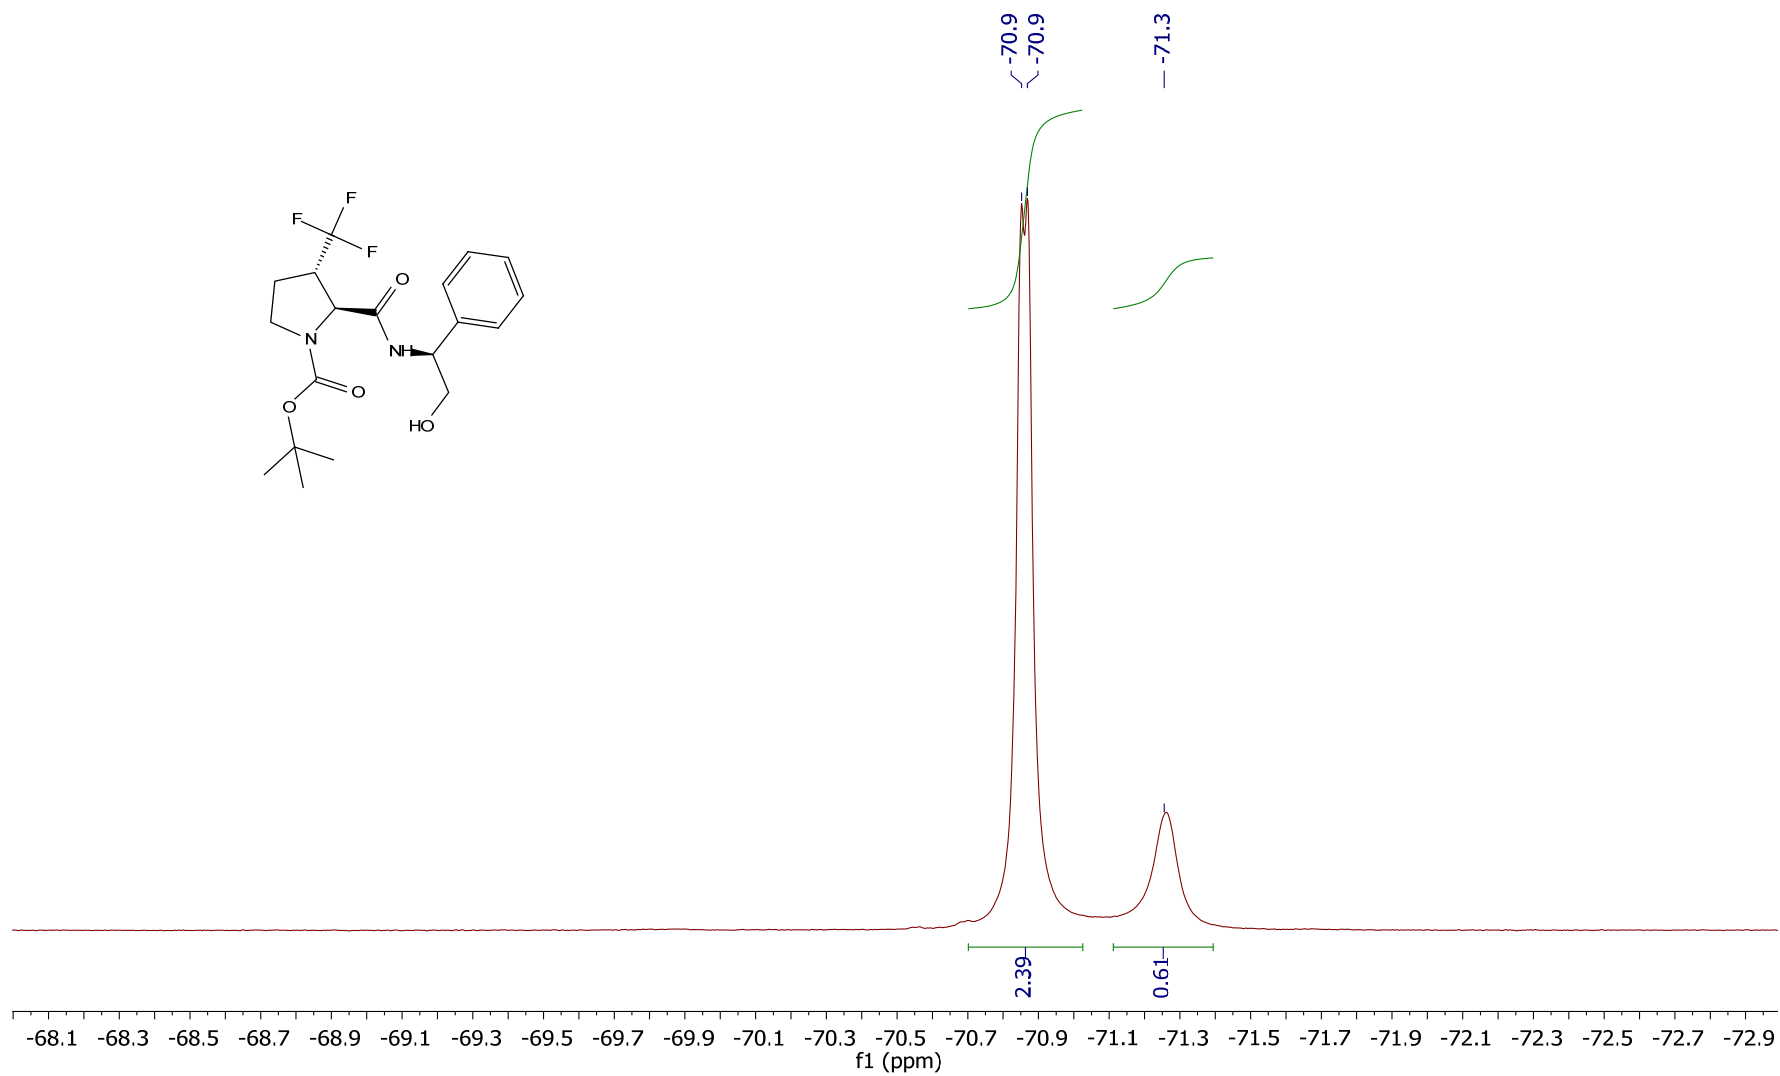

<sup>1</sup>H NMR spectrum of the compound (2*R*,3*R*)-**5a** (in CDCl<sub>3</sub>).

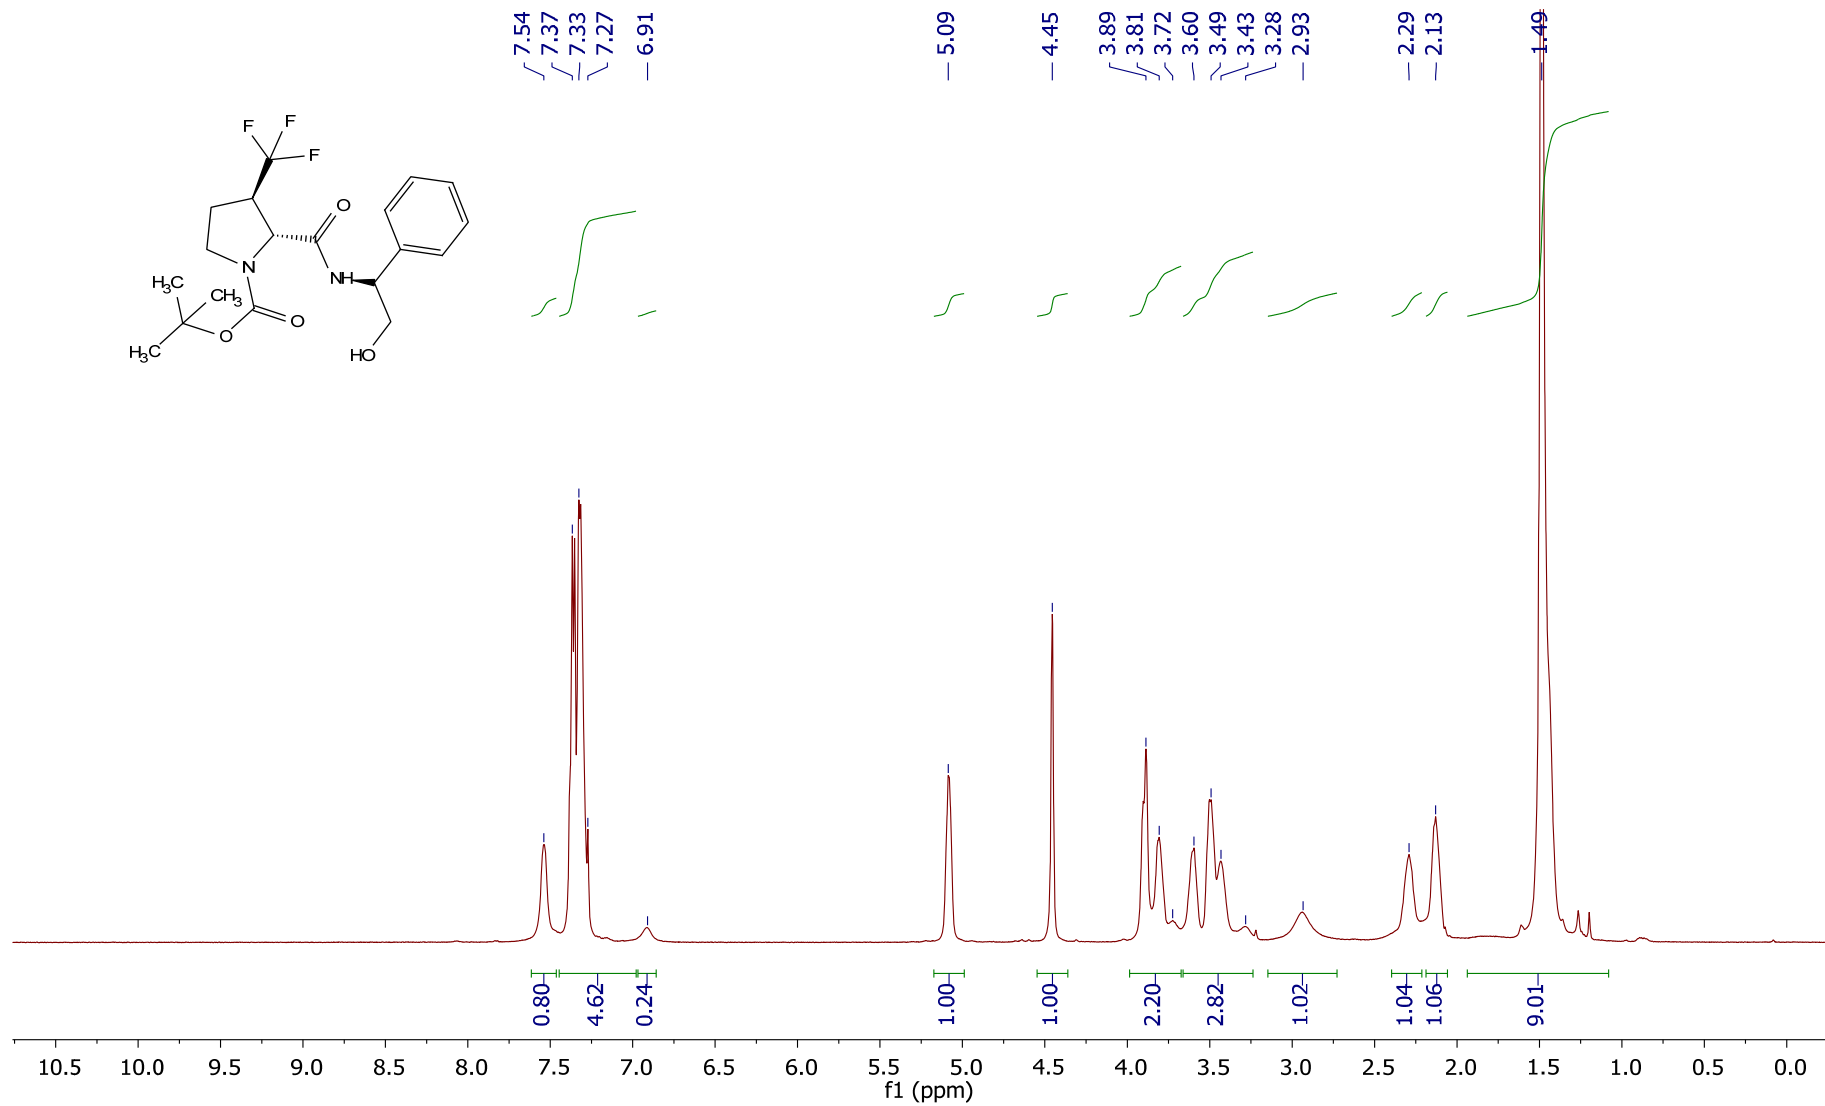

$^{13}\text{C}$  NMR spectrum of the compound (2*R*,3*R*)-**5a** (in  $\text{CDCl}_3$ ).

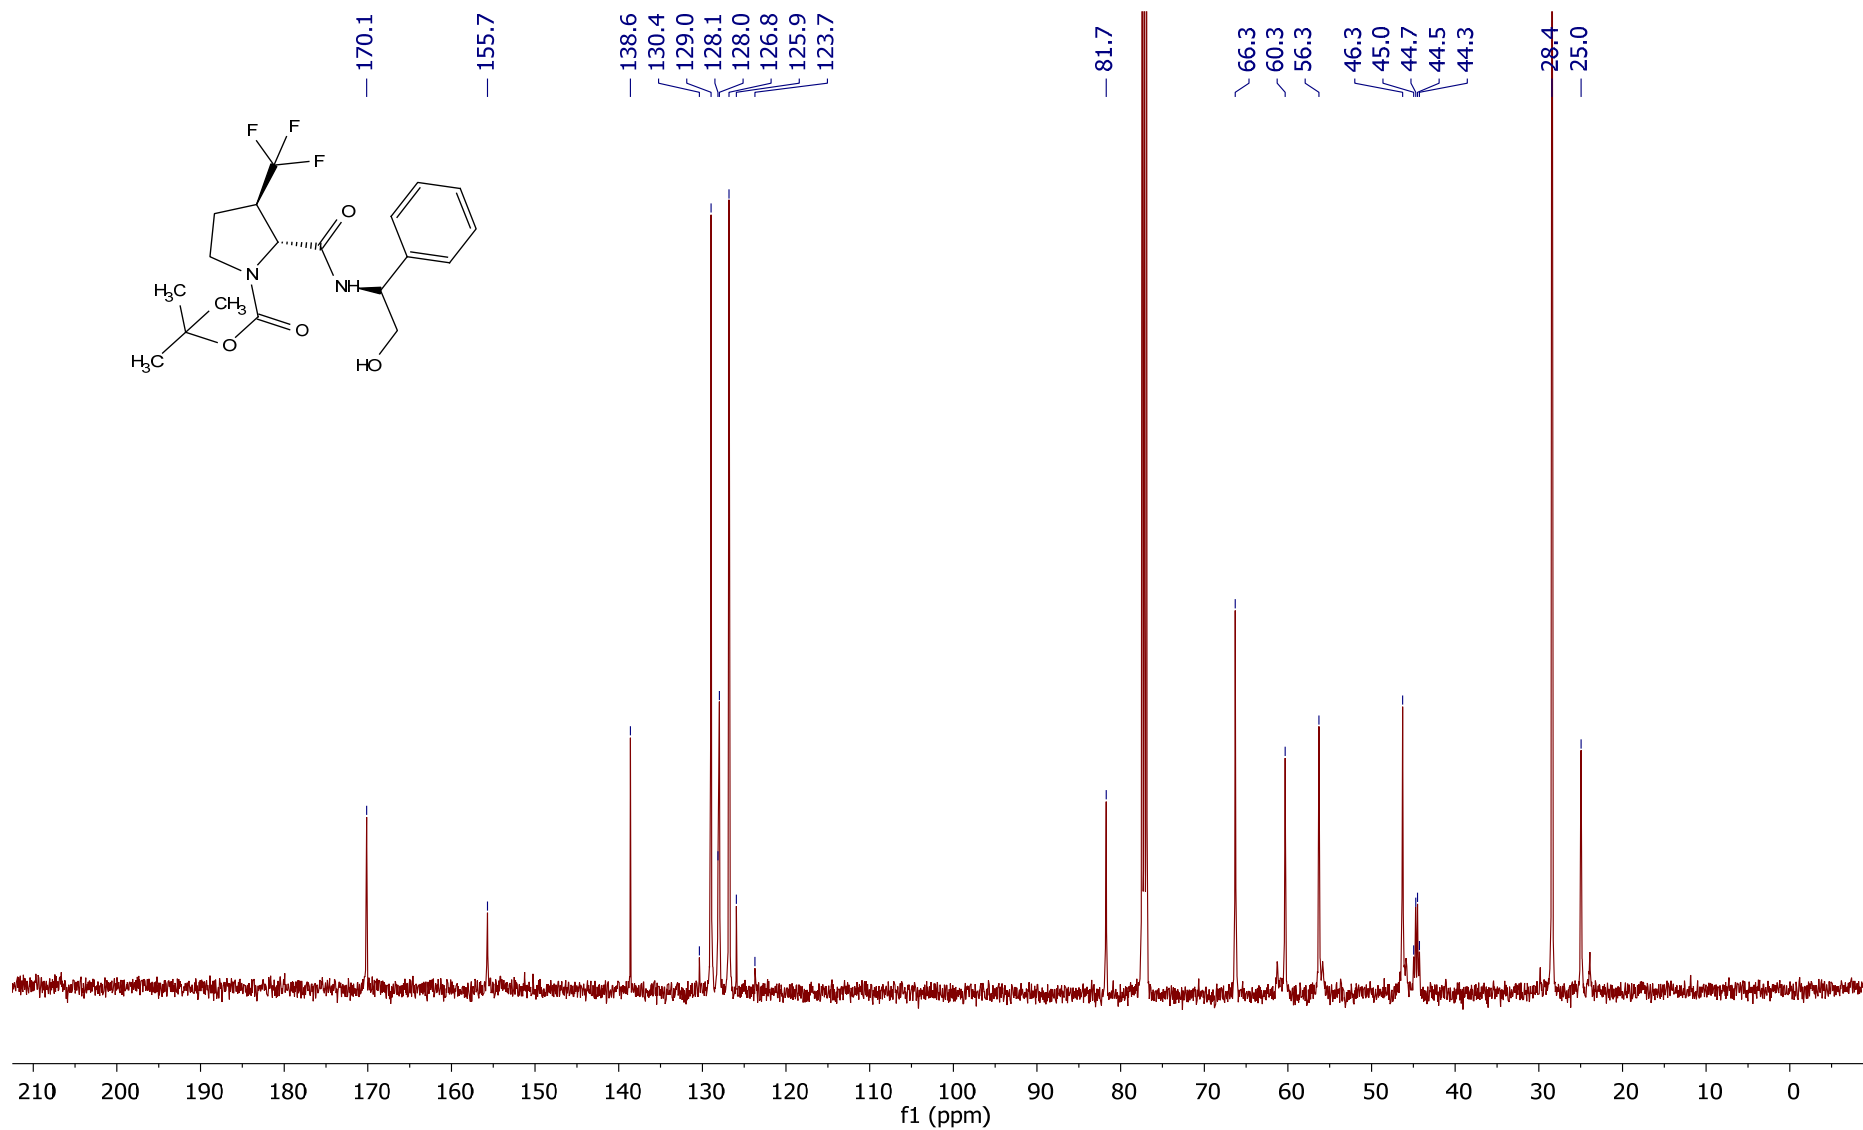



$^{19}\text{F}$  NMR spectrum of the compound (2*R*,3*R*)-**5a** (in  $\text{CDCl}_3$ ).

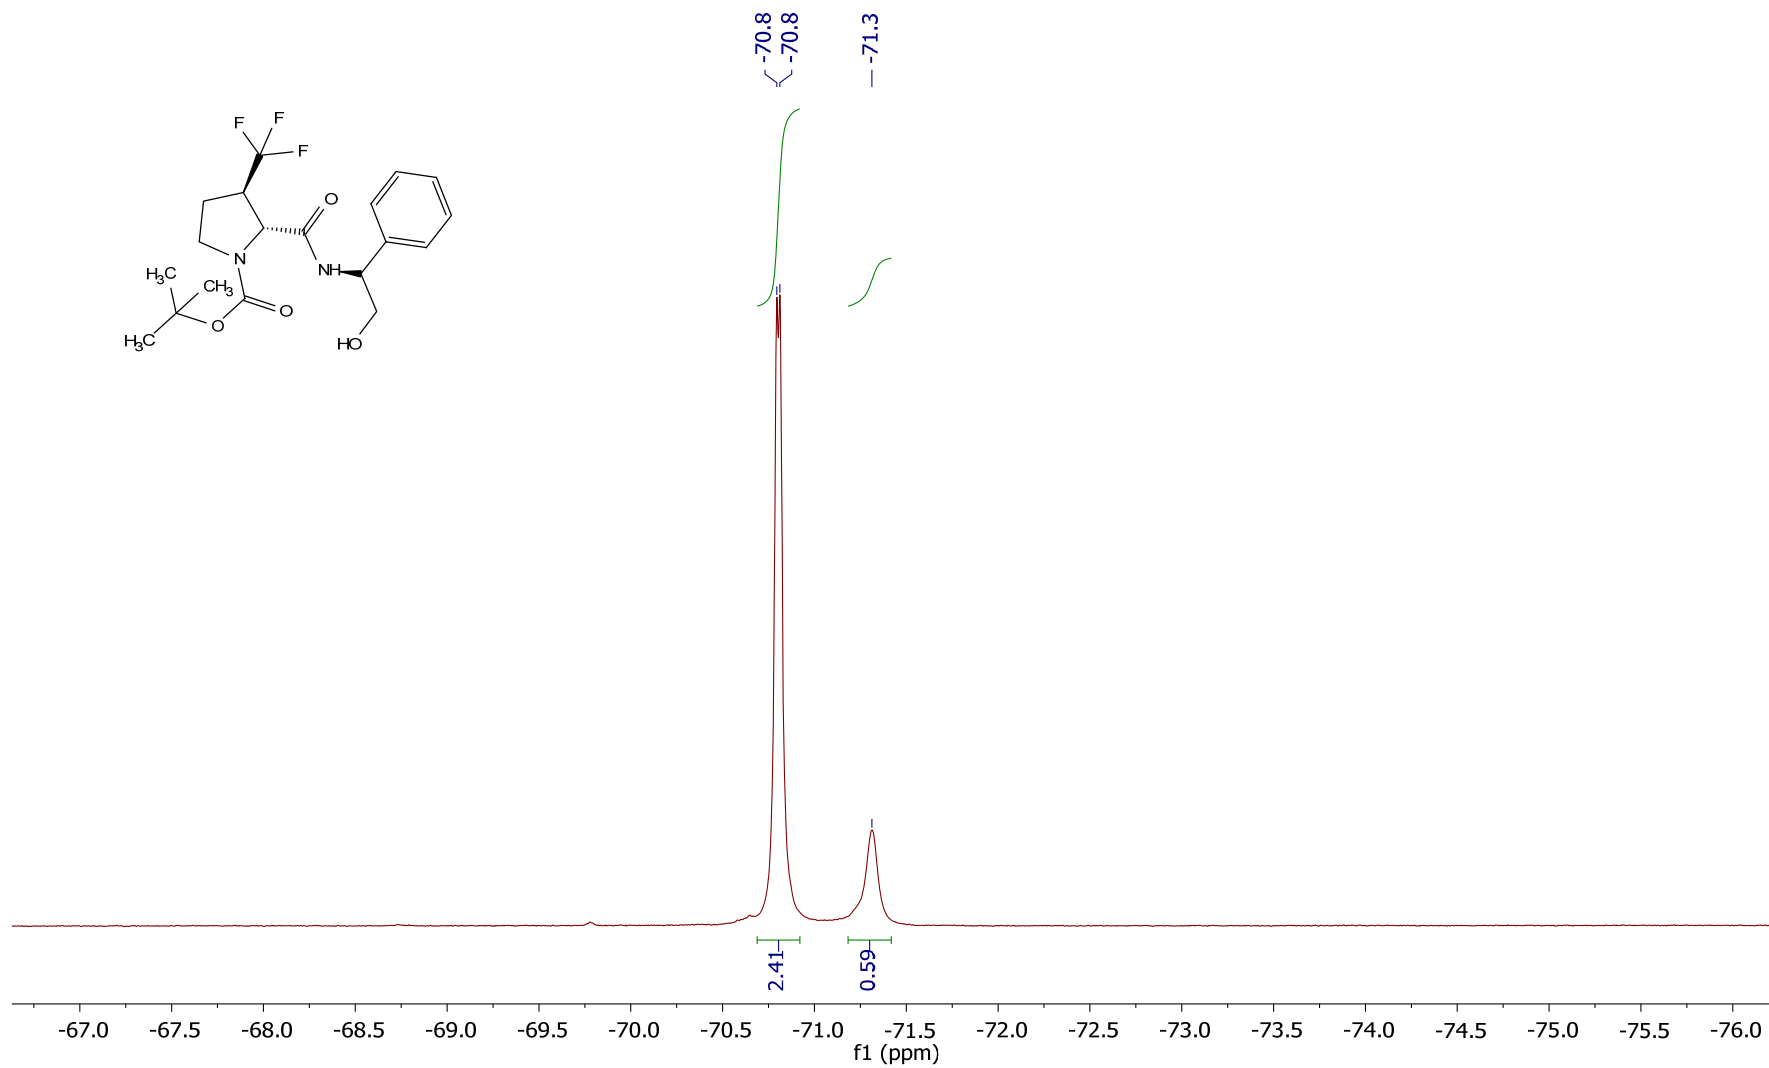

$^1\text{H}$  NMR spectrum of the compound (2*S*,3*S*)-**5b** (in  $\text{CDCl}_3$ ).

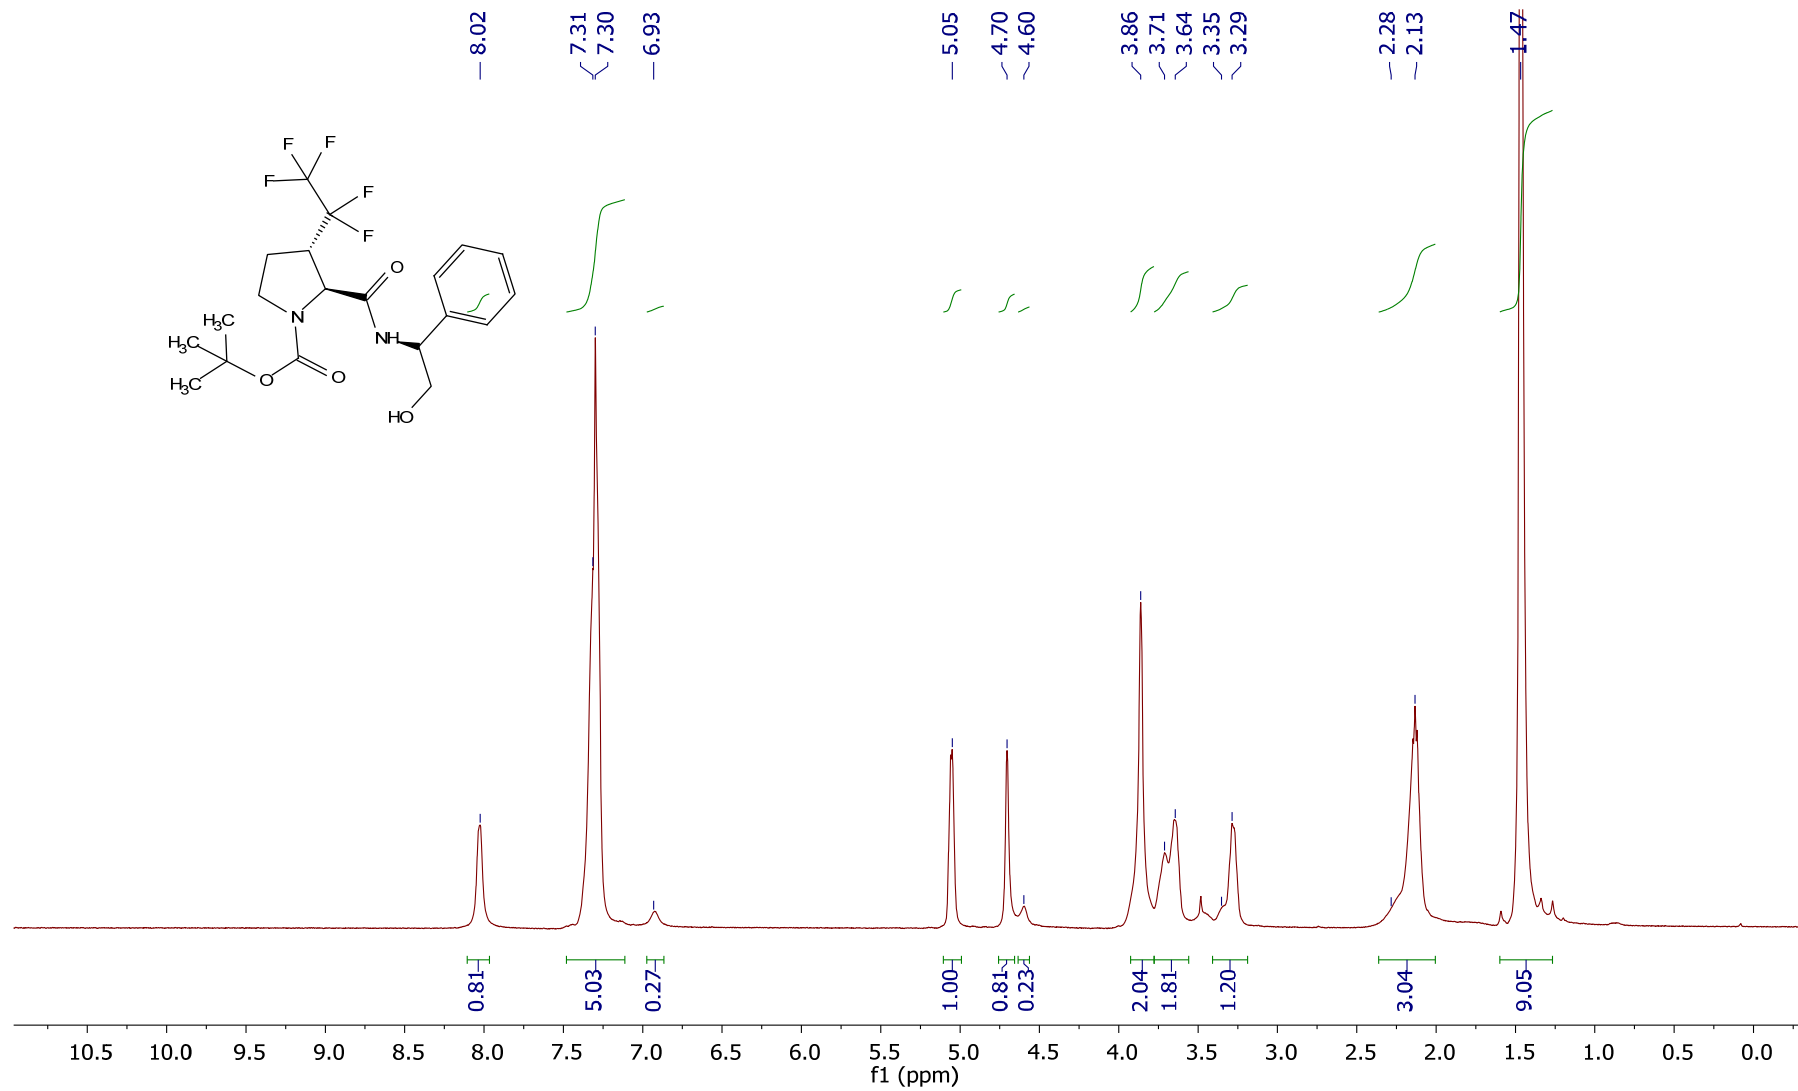

$^{13}\text{C}$  NMR spectrum of the compound (2*S*,3*S*)-**5b** (in  $\text{CDCl}_3$ ).

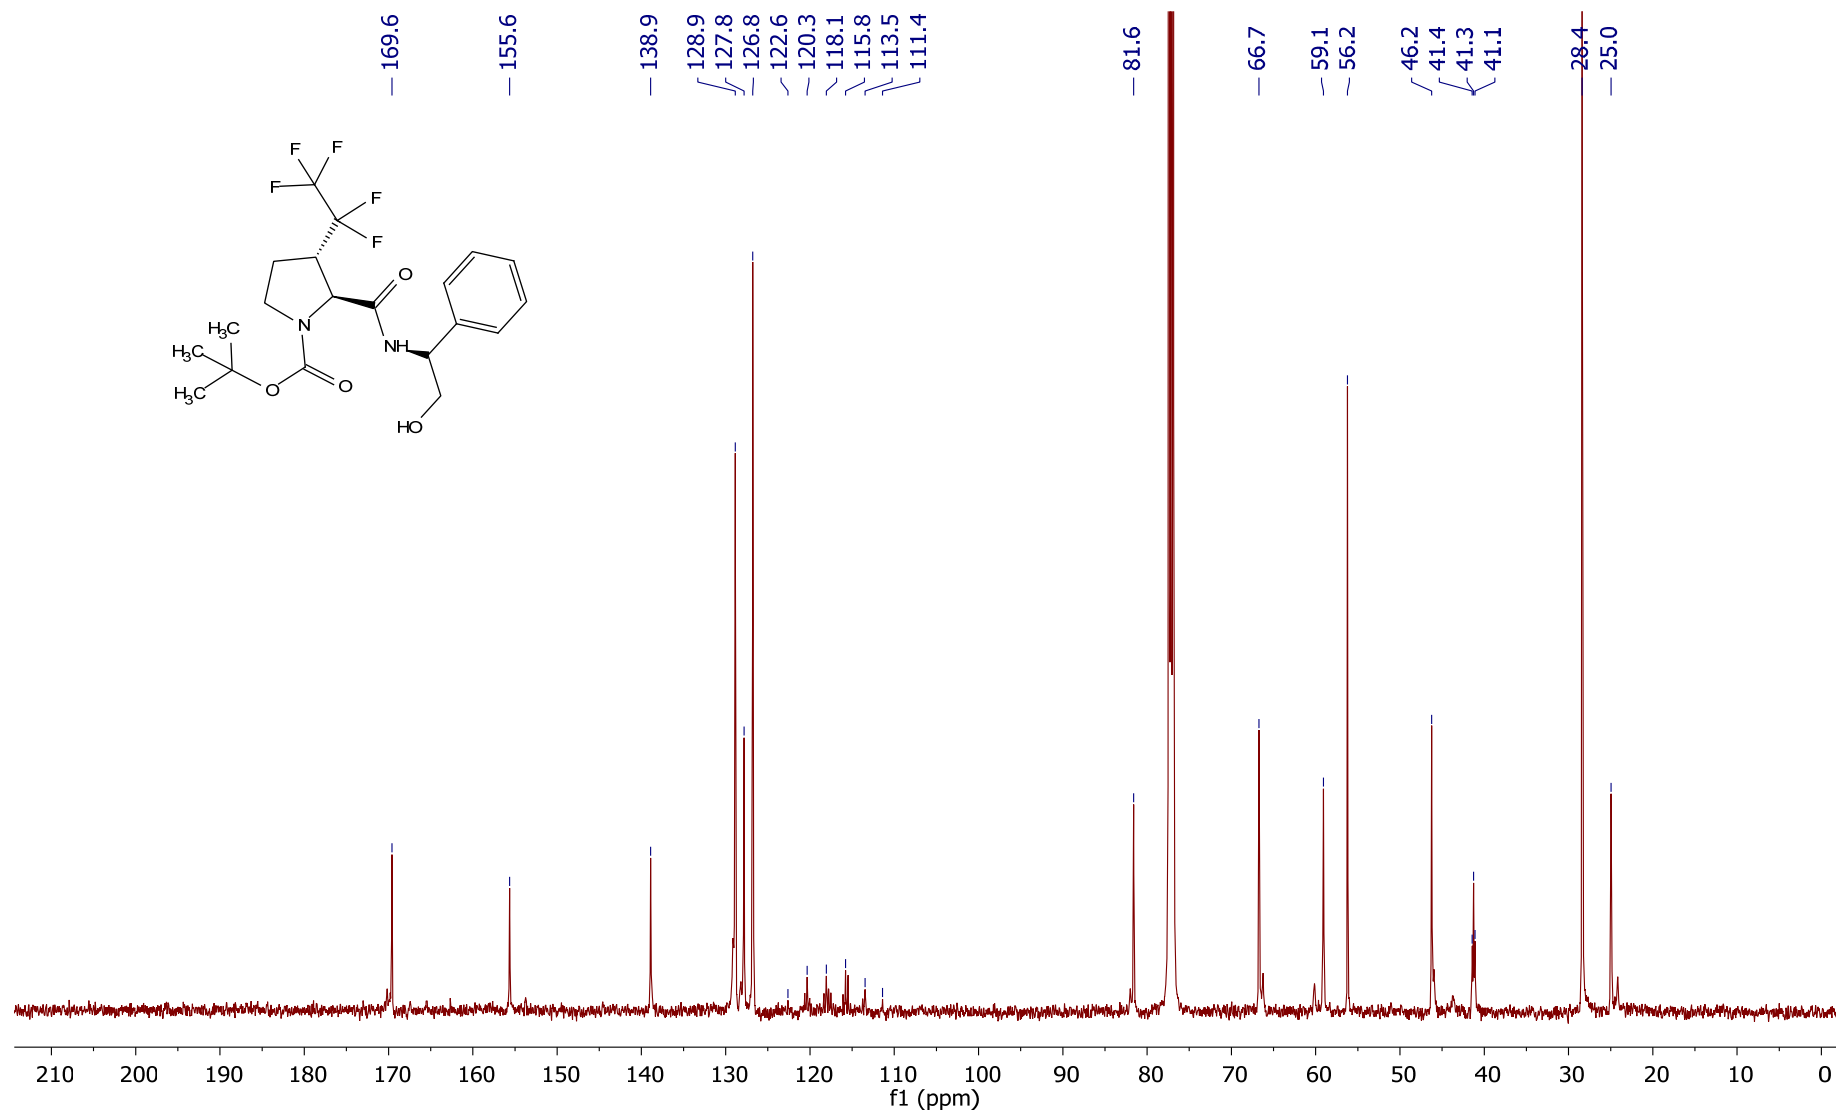

$^{19}\text{F}$  NMR spectrum of the compound (2*S*,3*S*)-**5b** (in  $\text{CDCl}_3$ ).

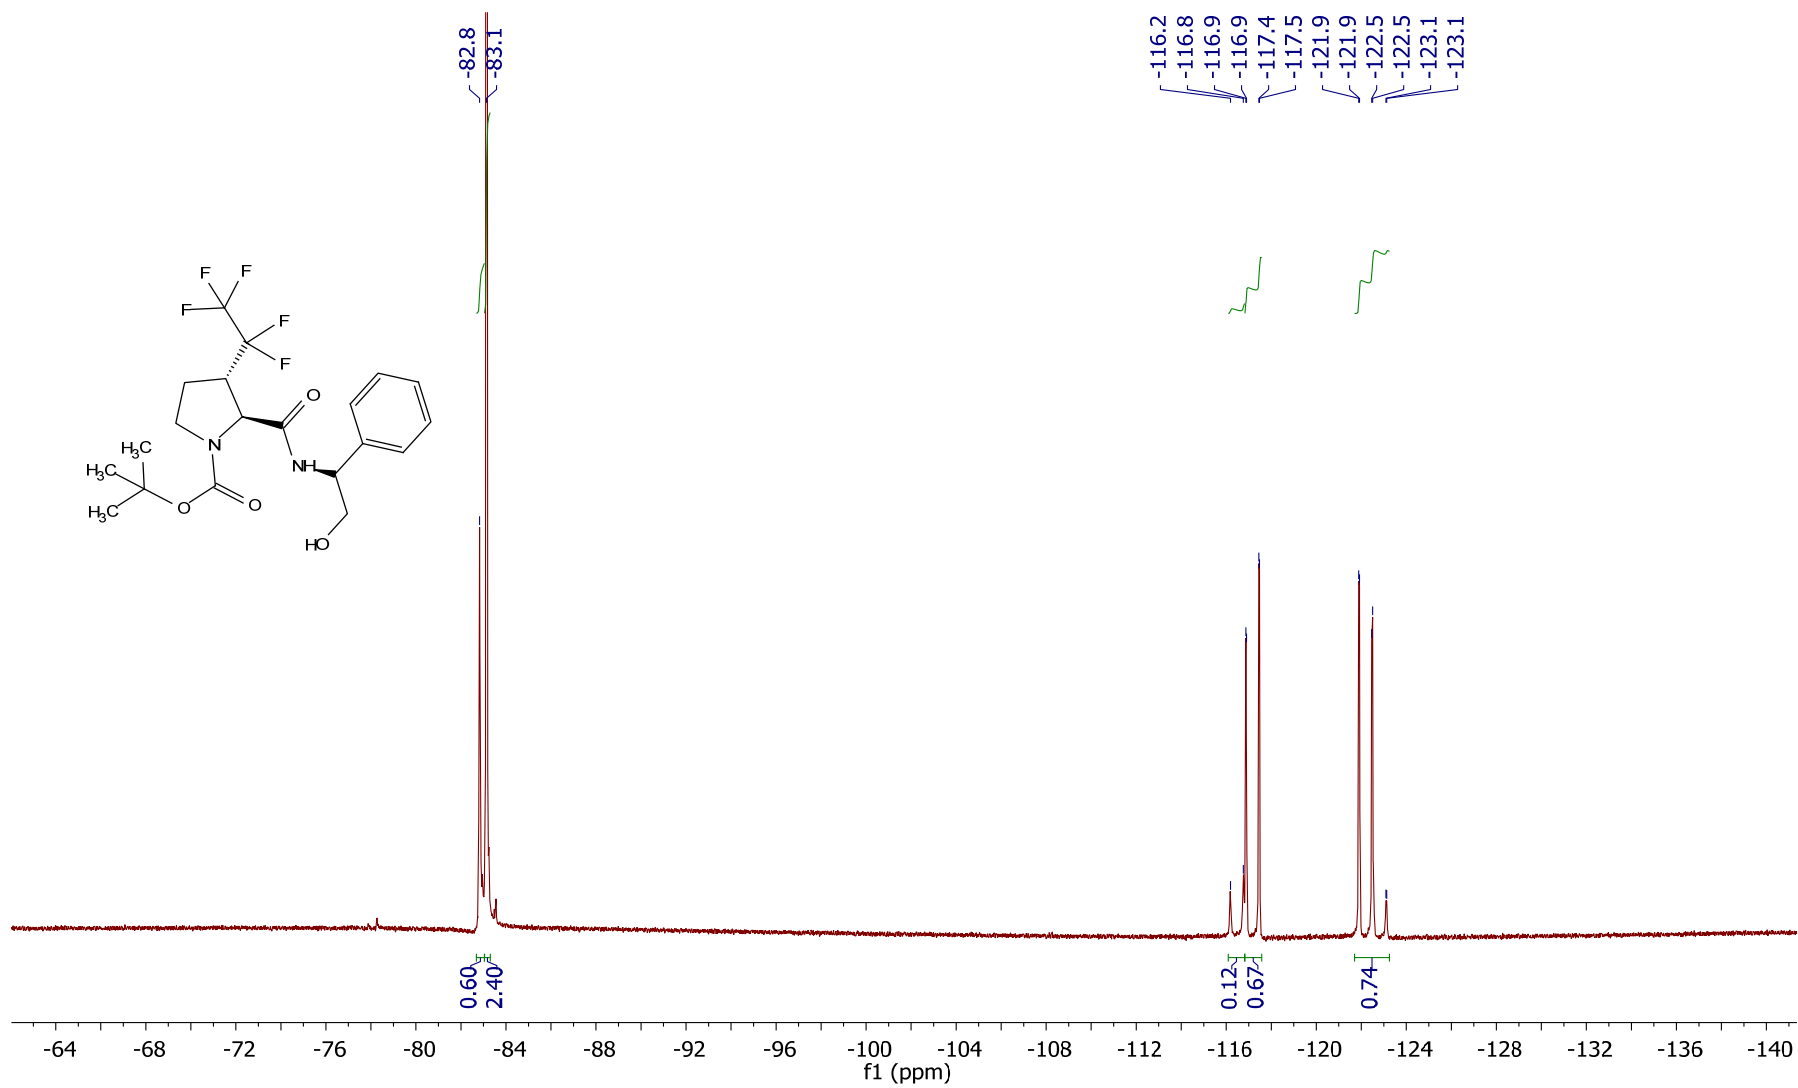

<sup>1</sup>H NMR spectrum of the compound (2*R*,3*R*)-**5b** (in CDCl<sub>3</sub>).

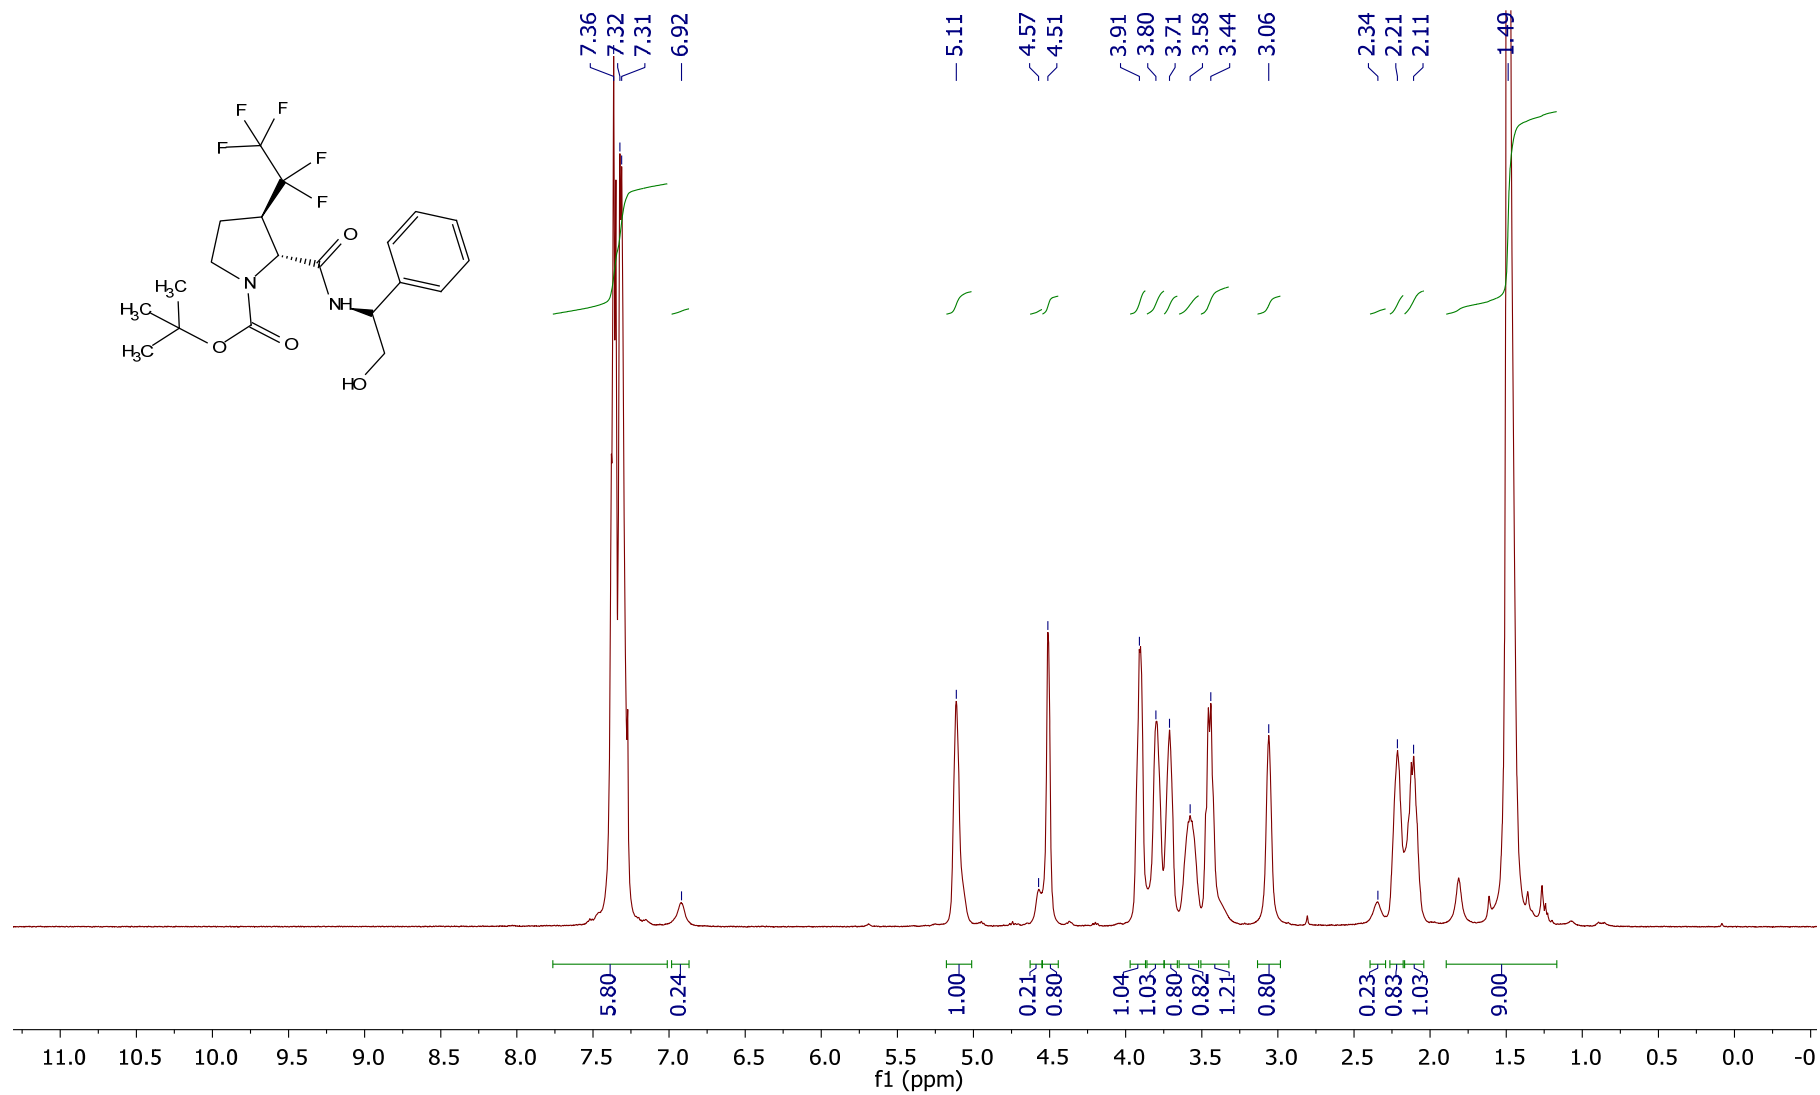

<sup>13</sup>C NMR spectrum of the compound (2*R*,3*R*)-**5b** (in CDCl<sub>3</sub>).

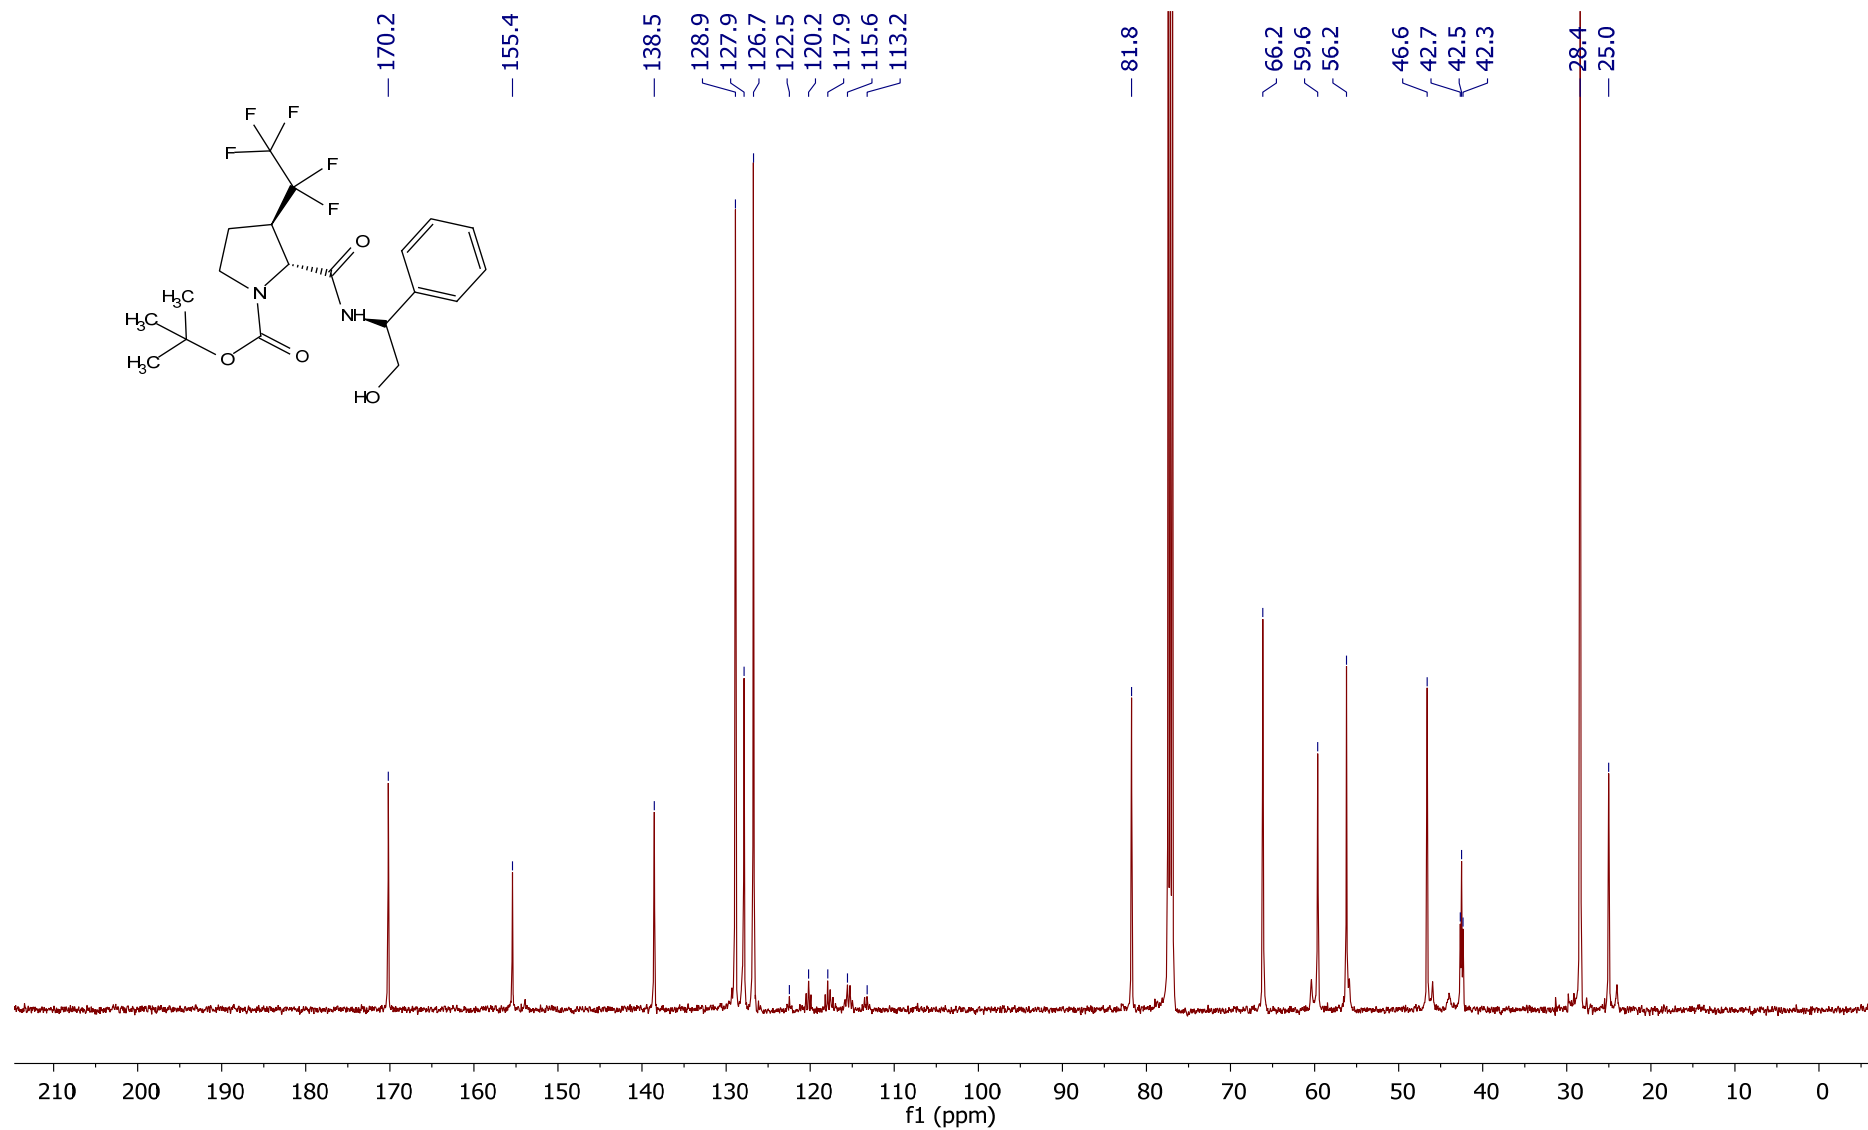

$^{19}\text{F}$  NMR spectrum of the compound (2*R*,3*R*)-**5b** (in  $\text{CDCl}_3$ ).

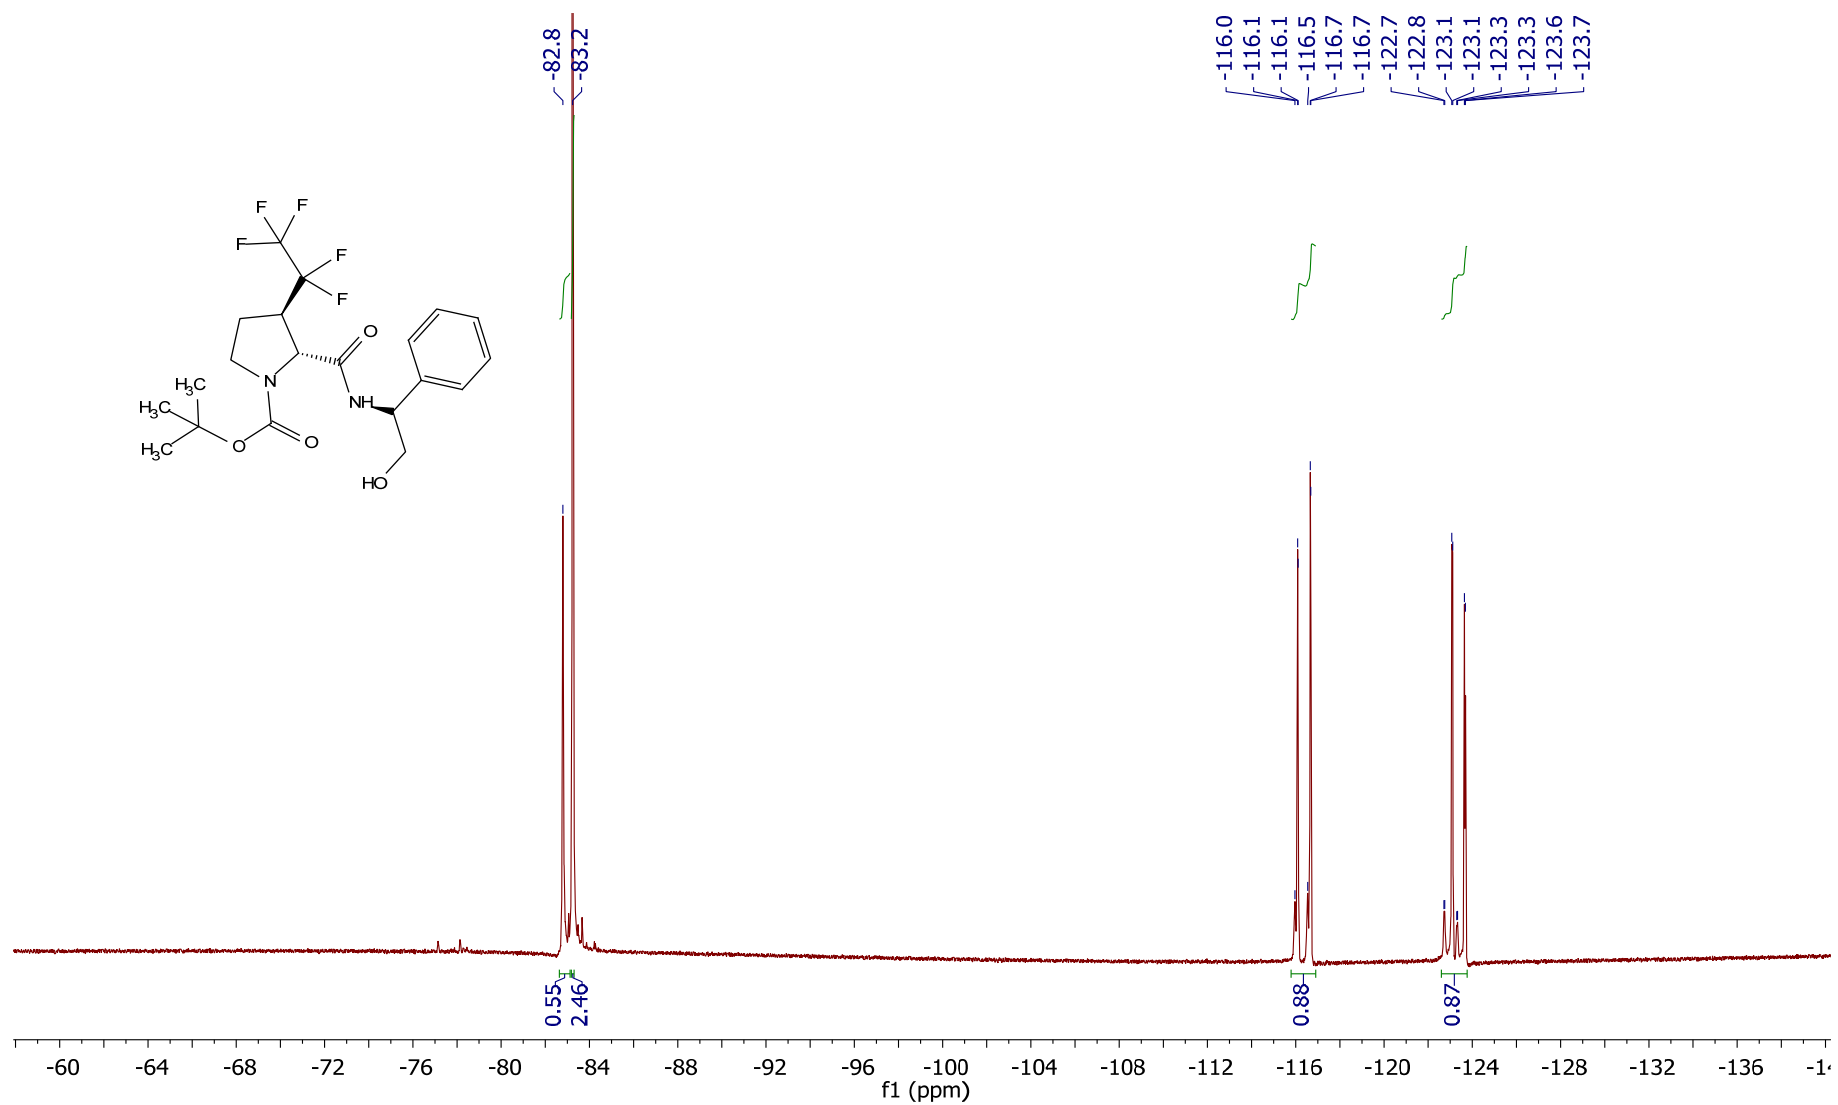

<sup>1</sup>H NMR spectrum of the compound (2*S*,3*R*)-**5a** (in CDCl<sub>3</sub>).

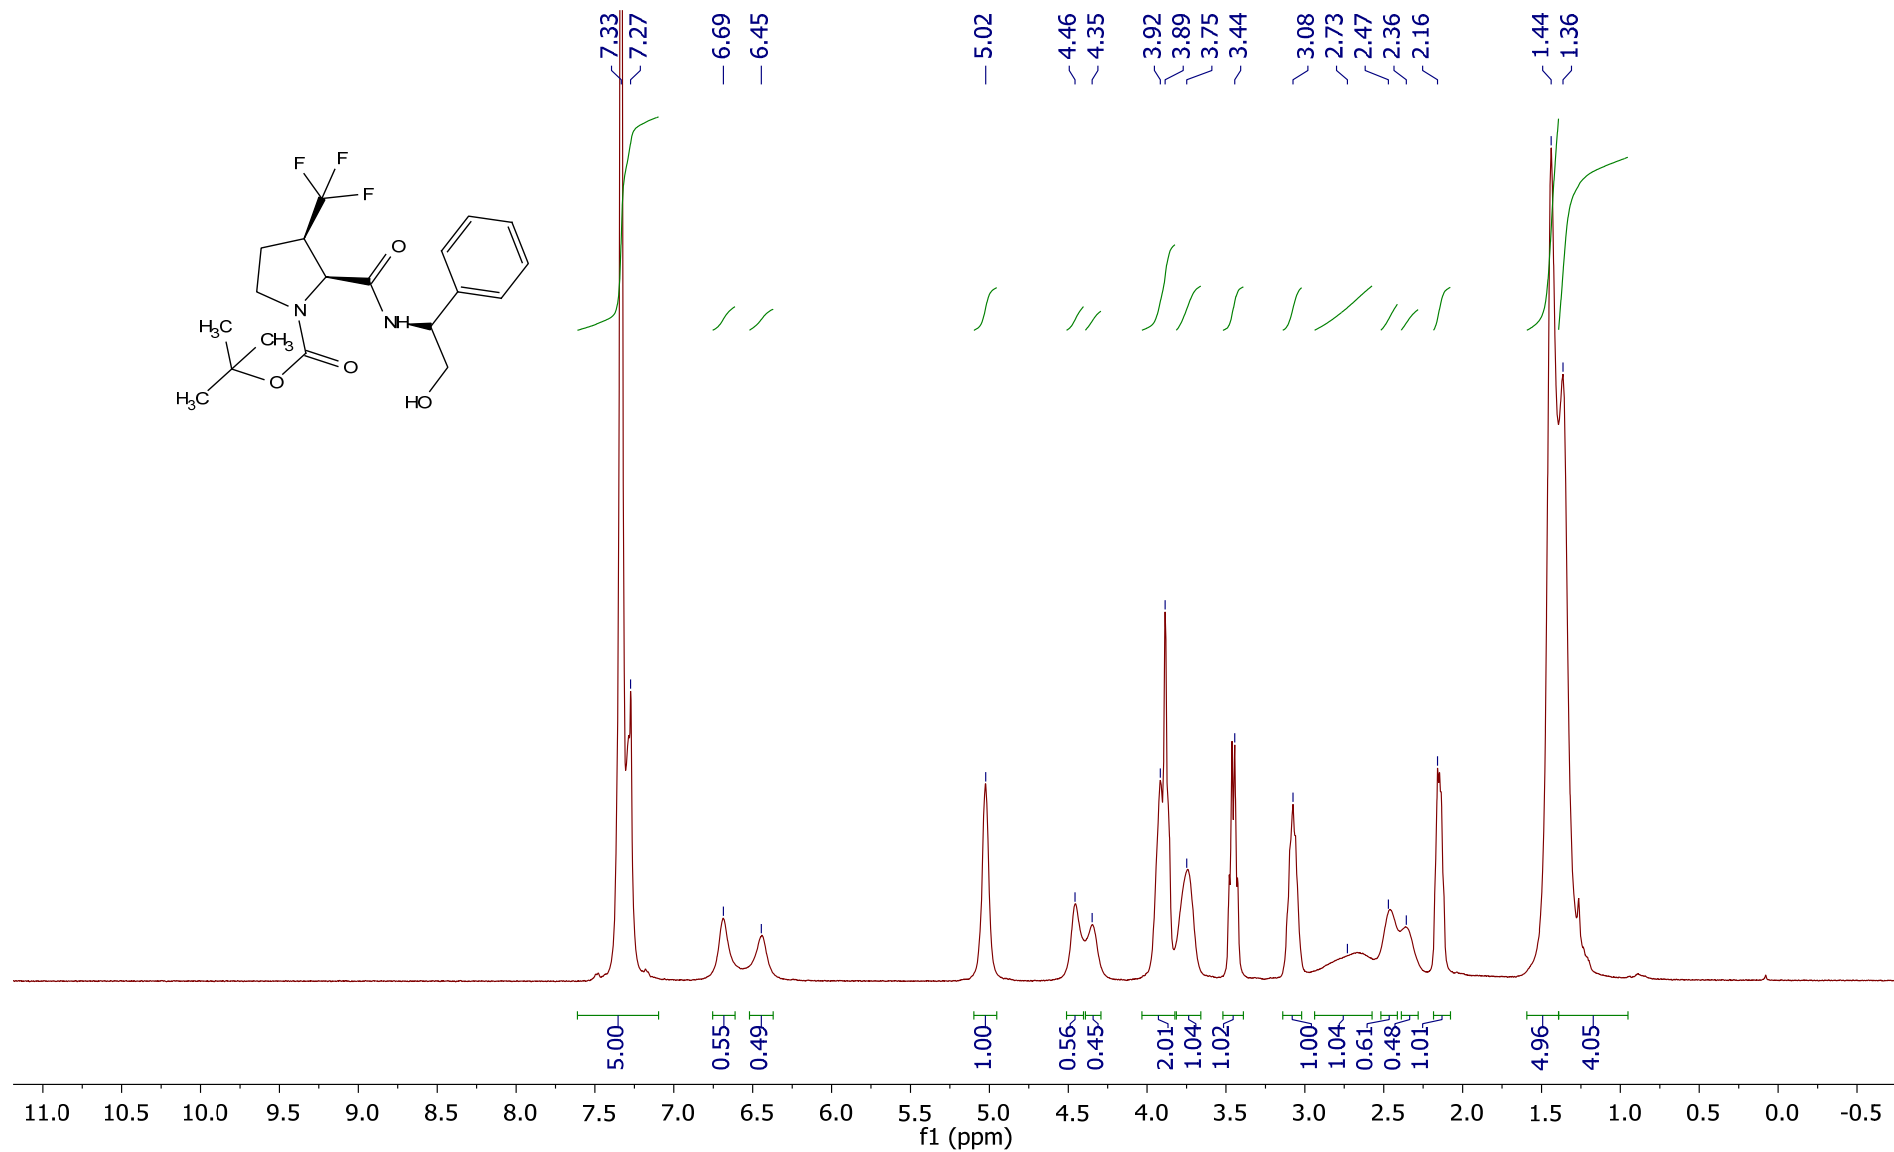



$^{13}\text{C}$  NMR spectrum of the compound (2*S*,3*R*)-**5a** (in  $\text{CDCl}_3$ ).

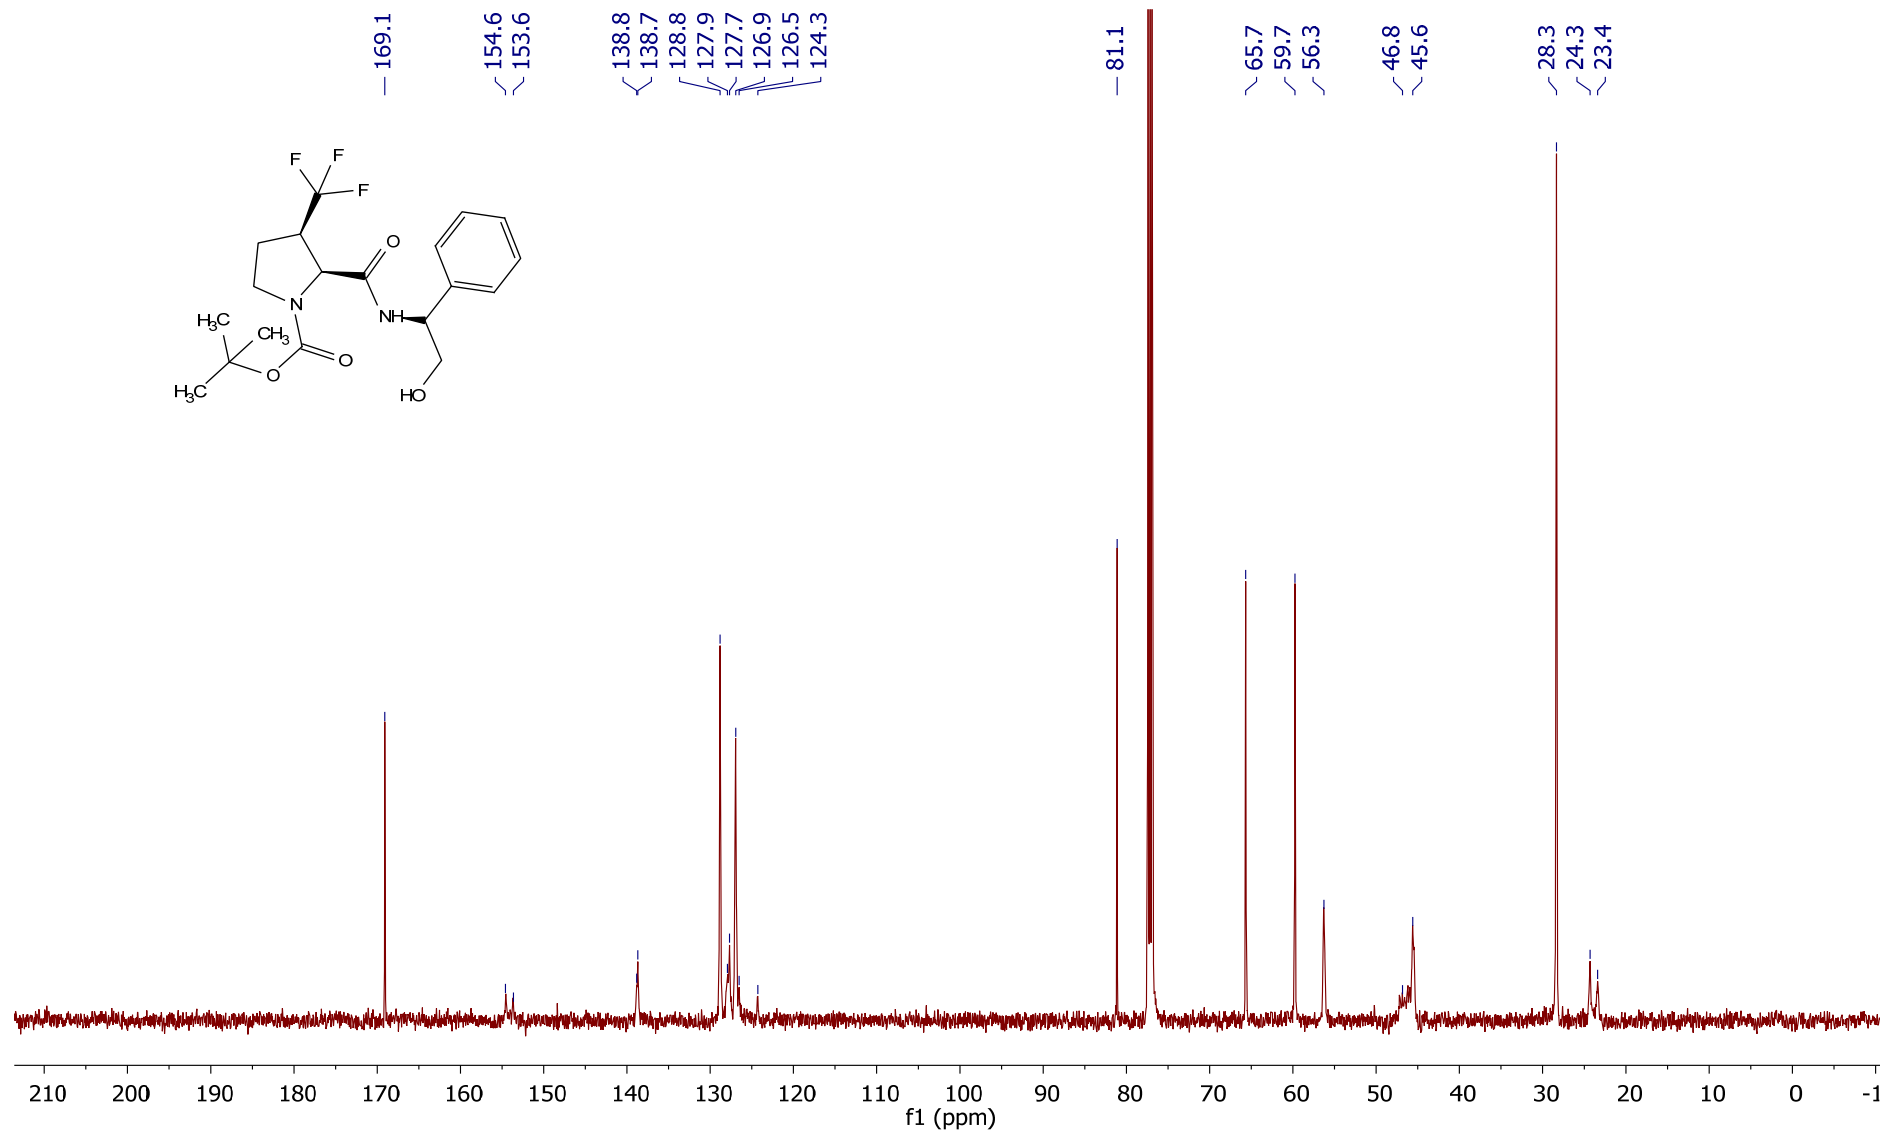

$^{19}\text{F}$  NMR spectrum of the compound (2*S*,3*R*)-**5a** (in  $\text{CDCl}_3$ ).

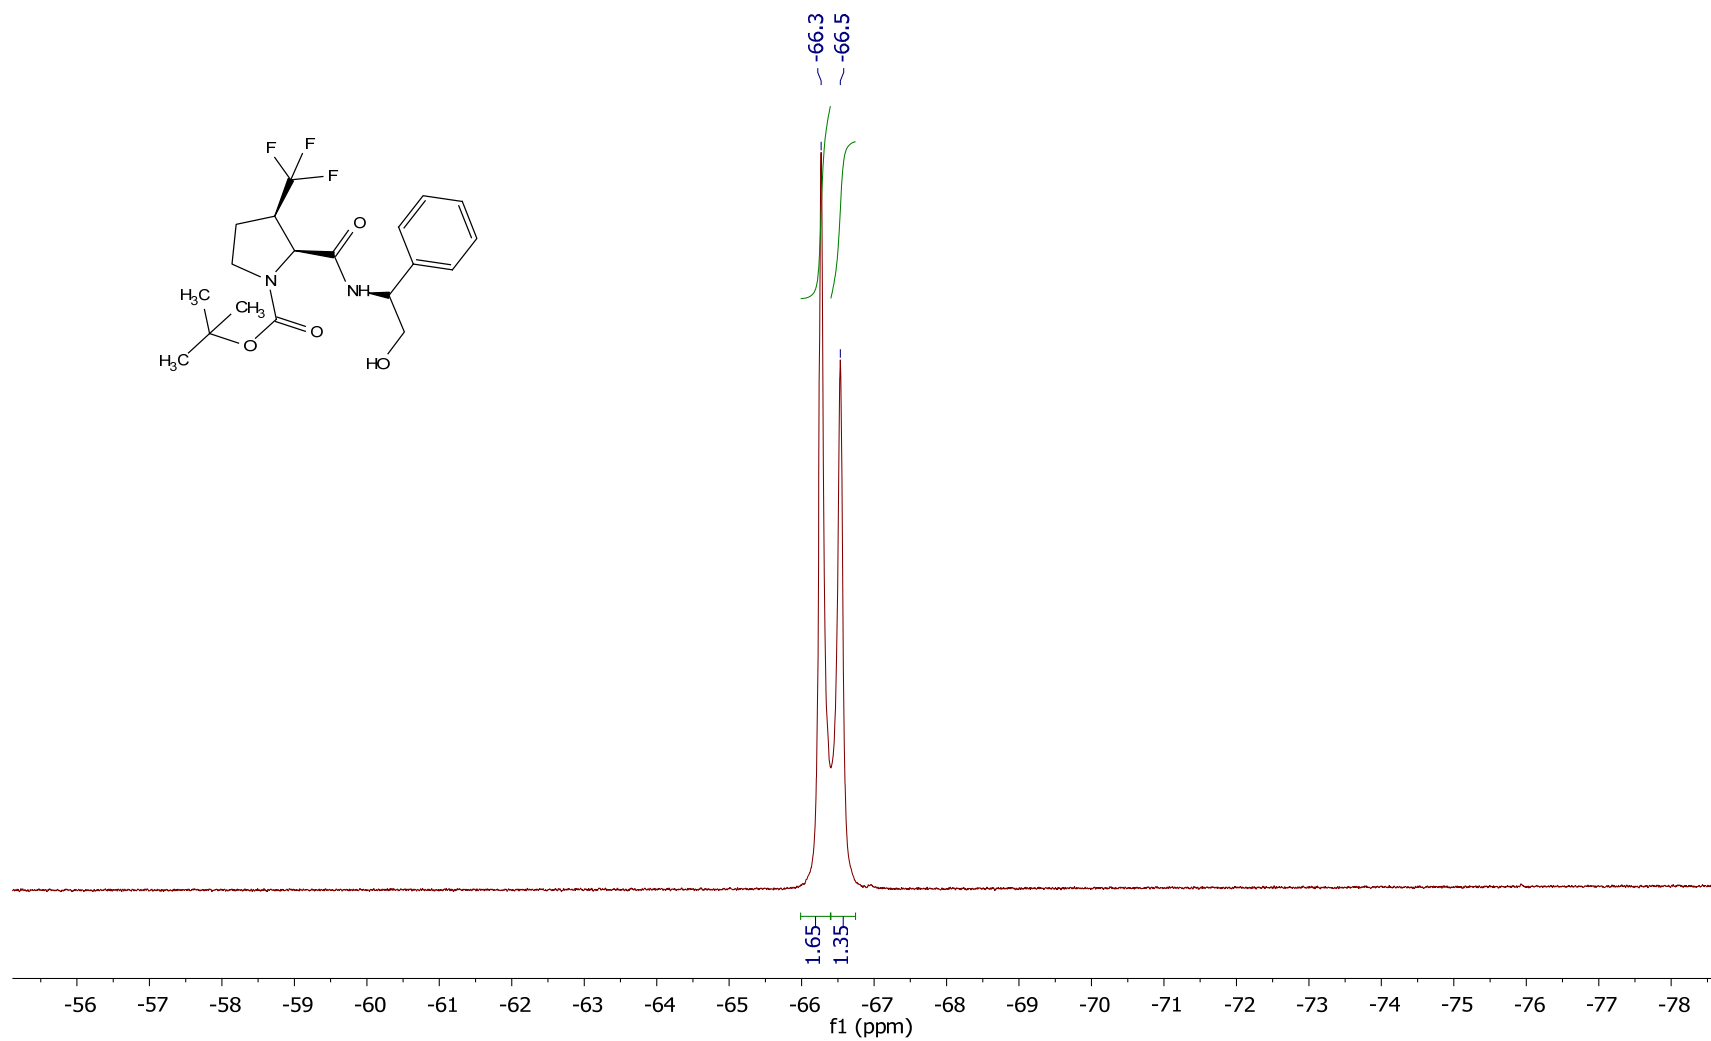

<sup>1</sup>H NMR spectrum of the compound (2*R*,3*S*)-**5a** (in CDCl<sub>3</sub>).

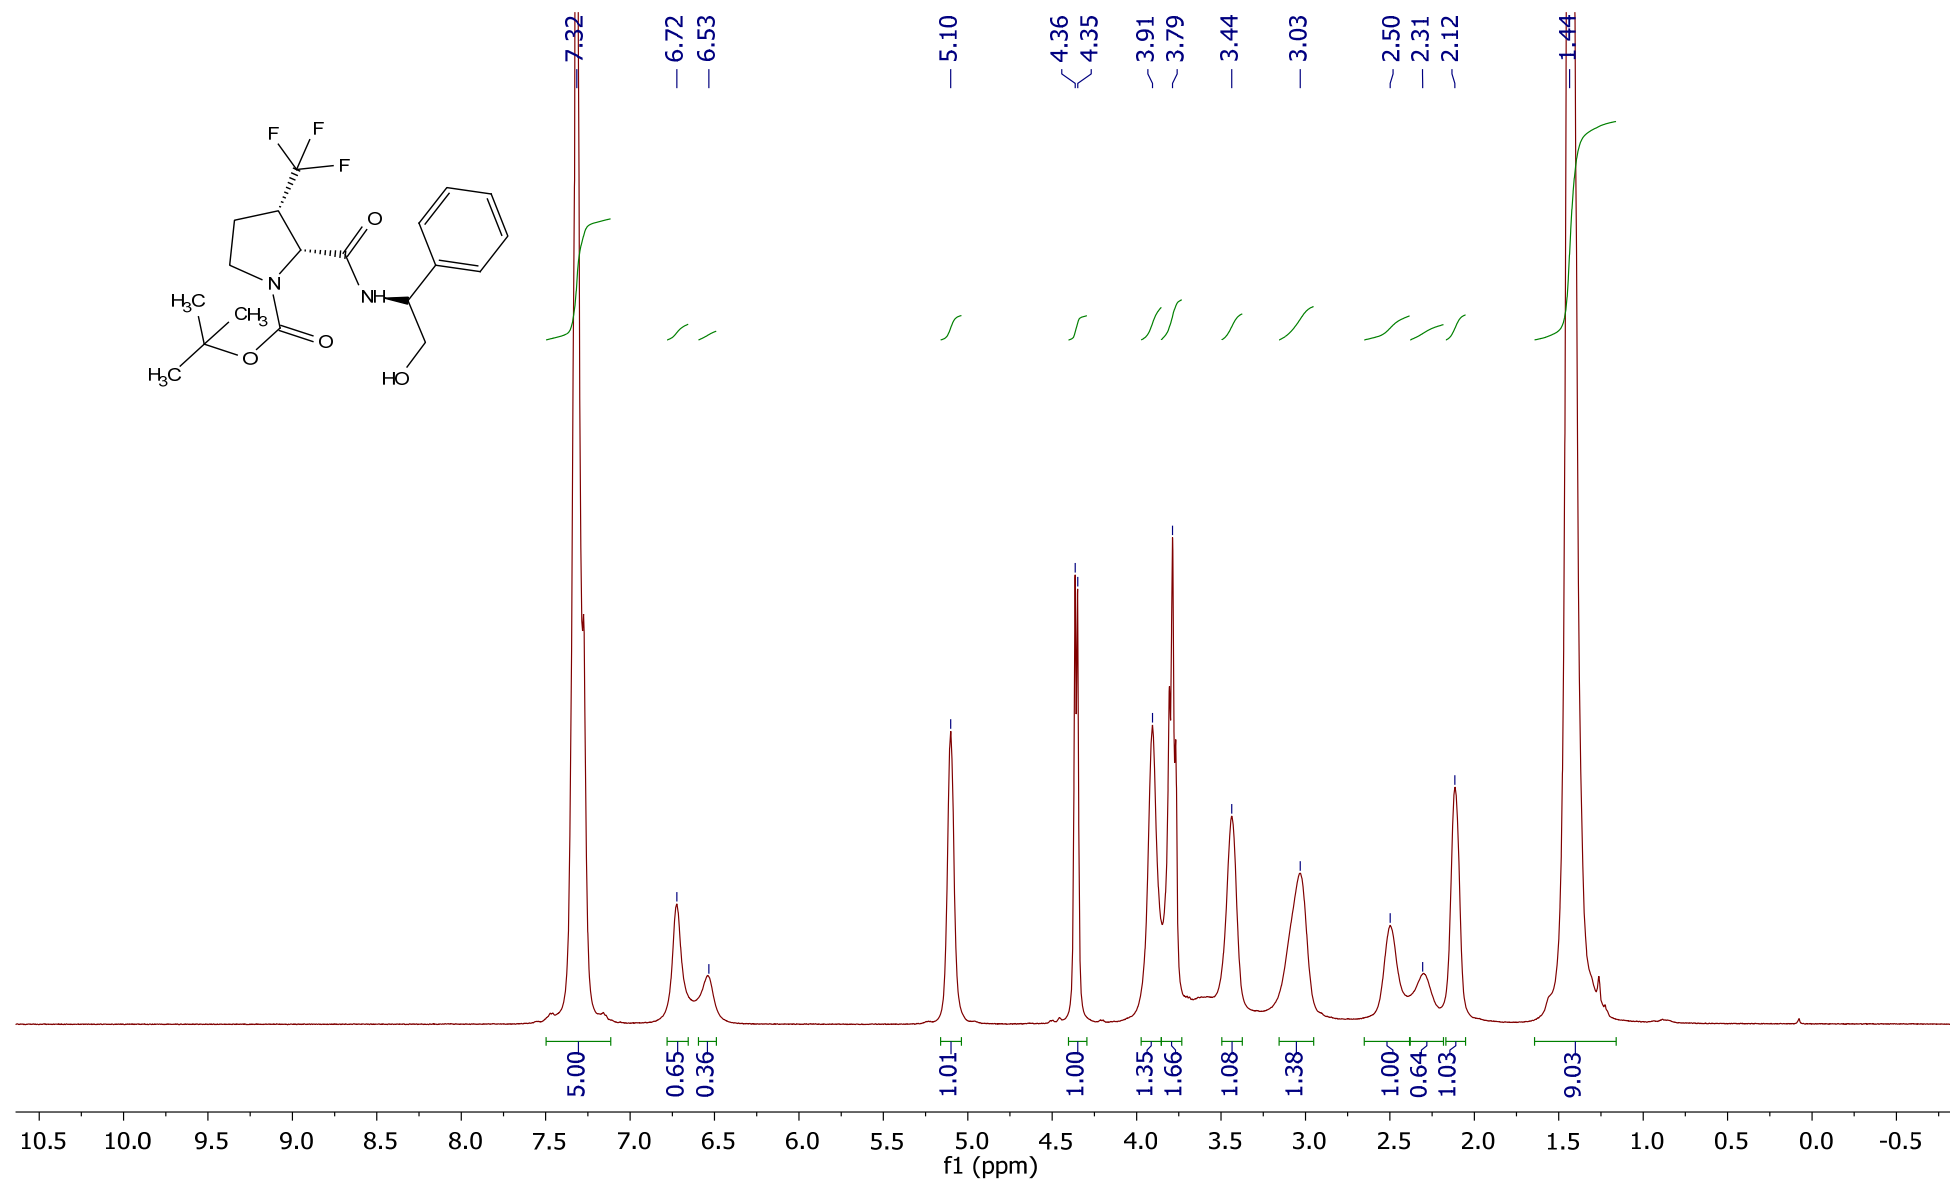

$^{13}\text{C}$  NMR spectrum of the compound (2*R*,3*S*)-**5a** (in  $\text{CDCl}_3$ ).

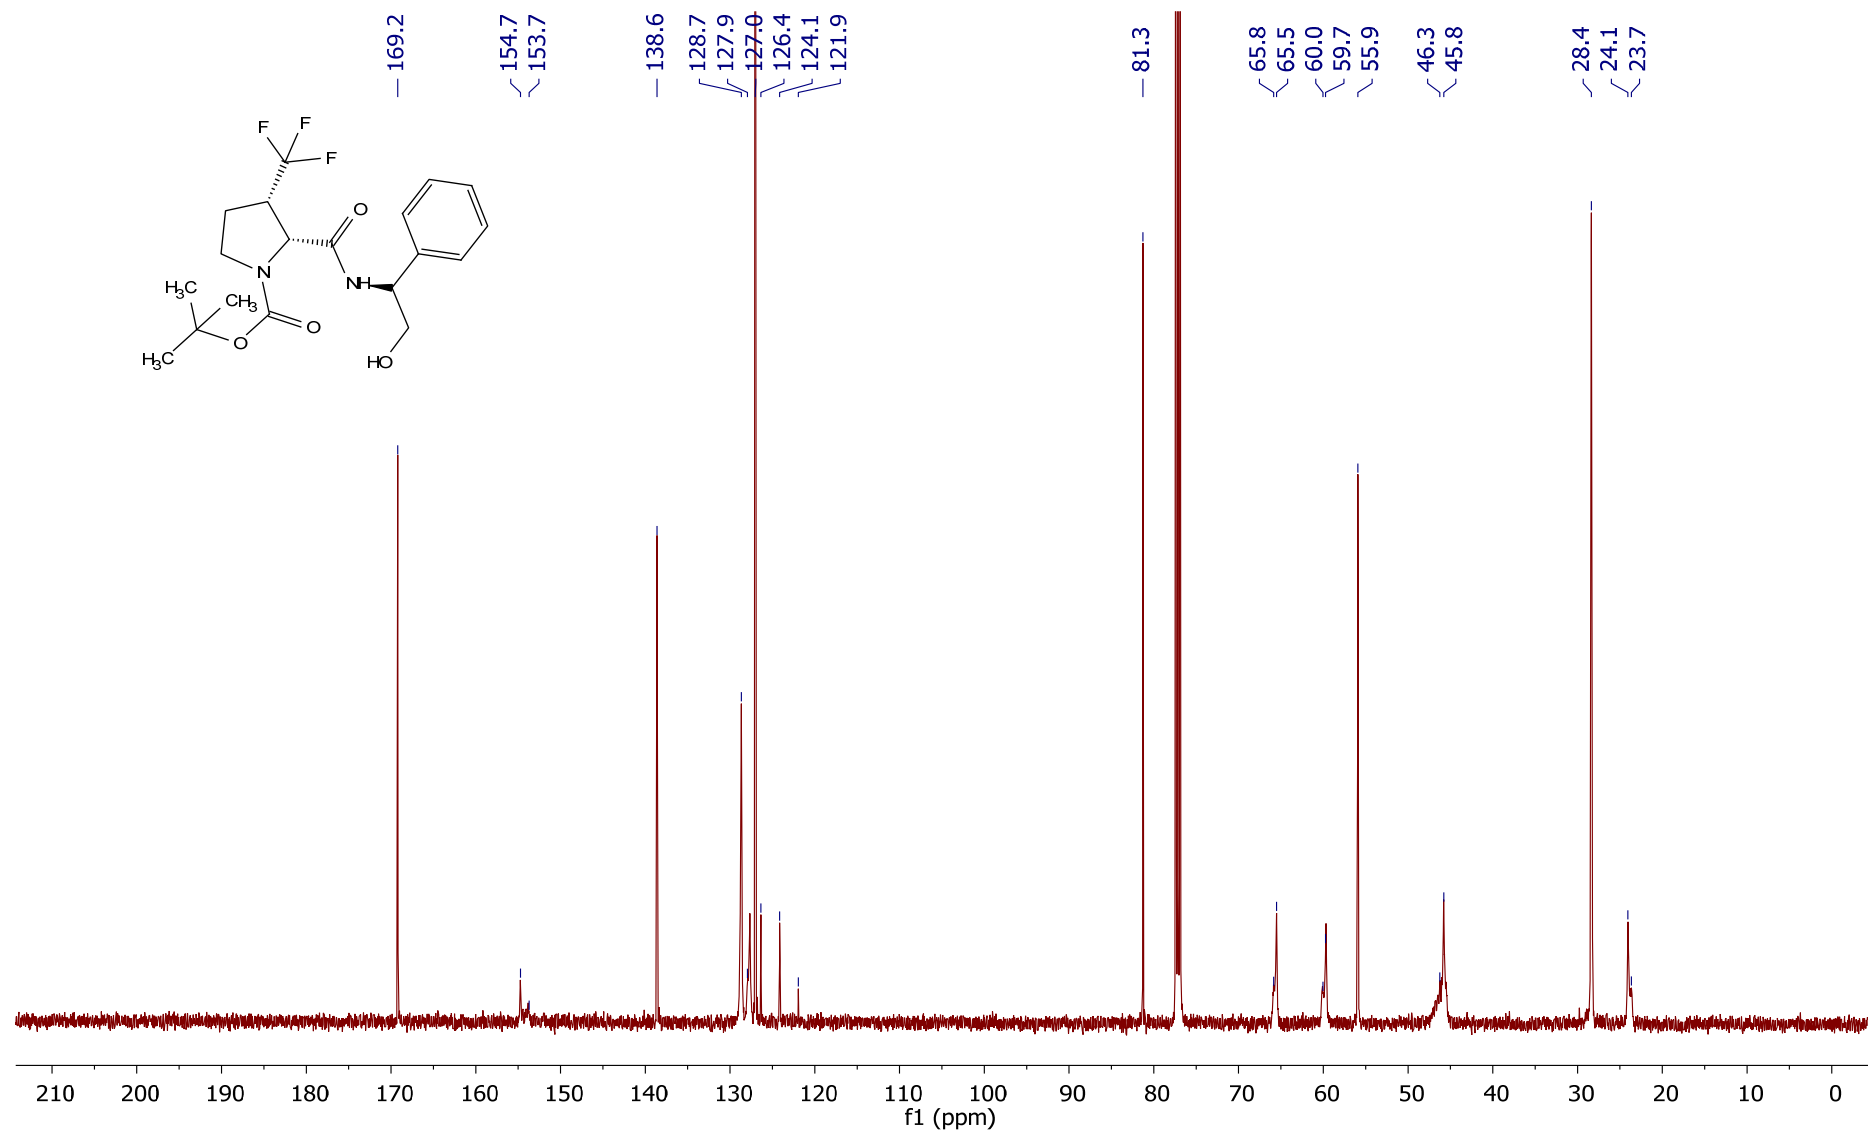

$^{19}\text{F}$  NMR spectrum of the compound (2*R*,3*S*)-**5a** (in  $\text{CDCl}_3$ ).

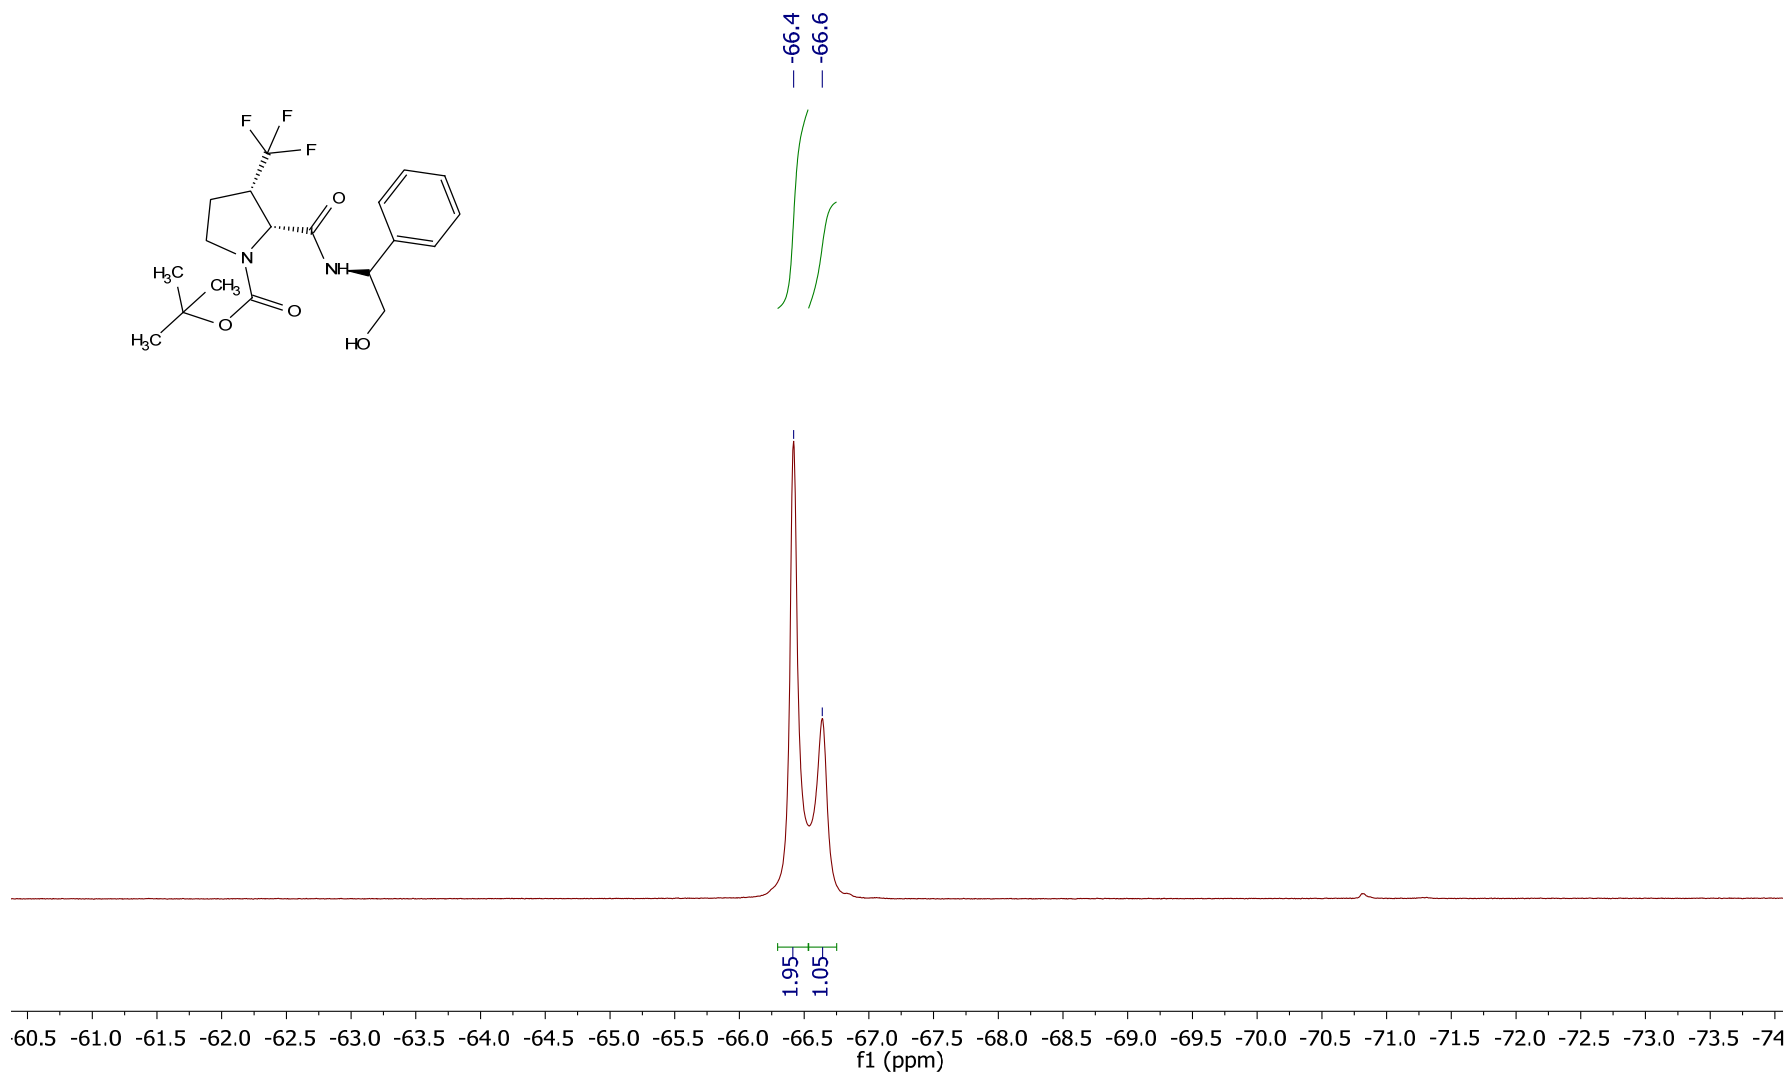

$^1\text{H}$  NMR spectrum of the compound (2*S*,3*R*)-**5b** (in  $\text{CDCl}_3$ ).

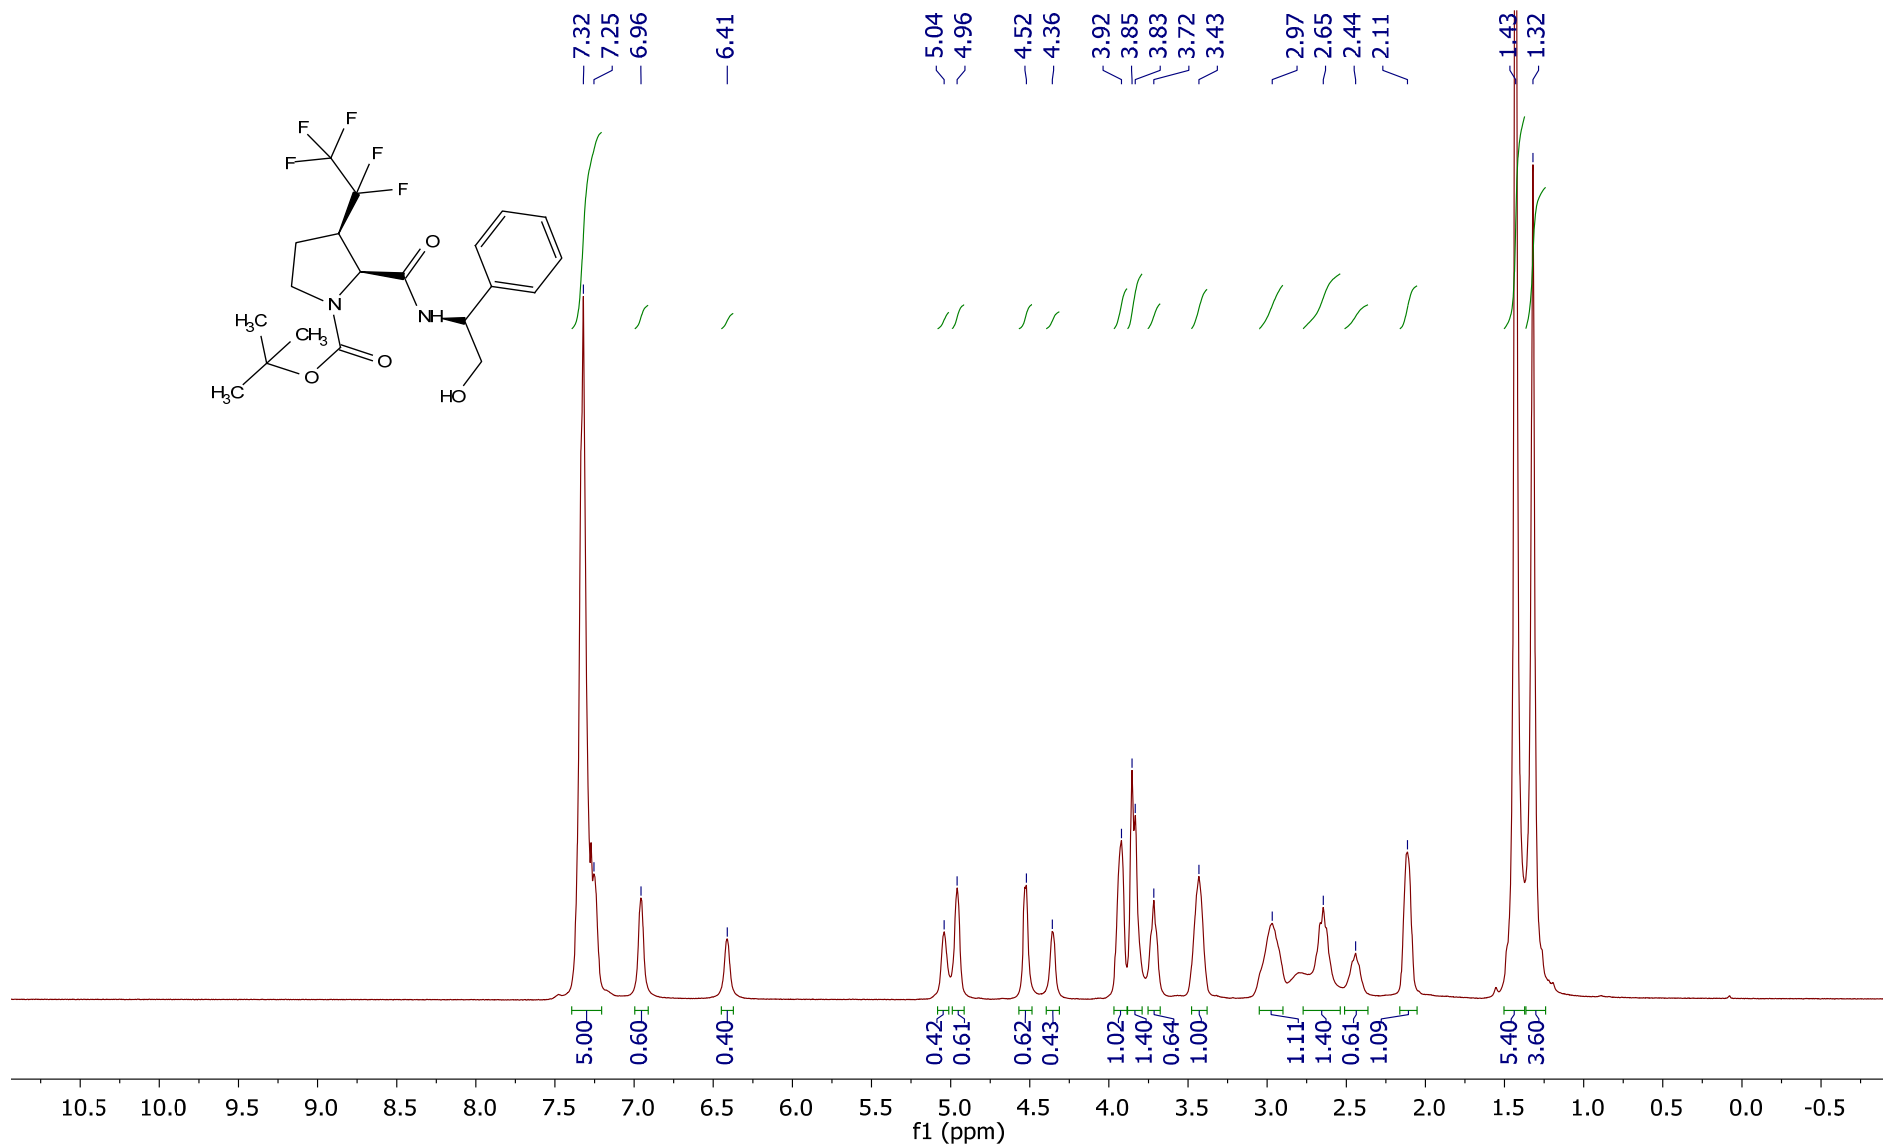

$^{13}\text{C}$  NMR spectrum of the compound (2*S*,3*R*)-**5b** (in  $\text{CDCl}_3$ ).

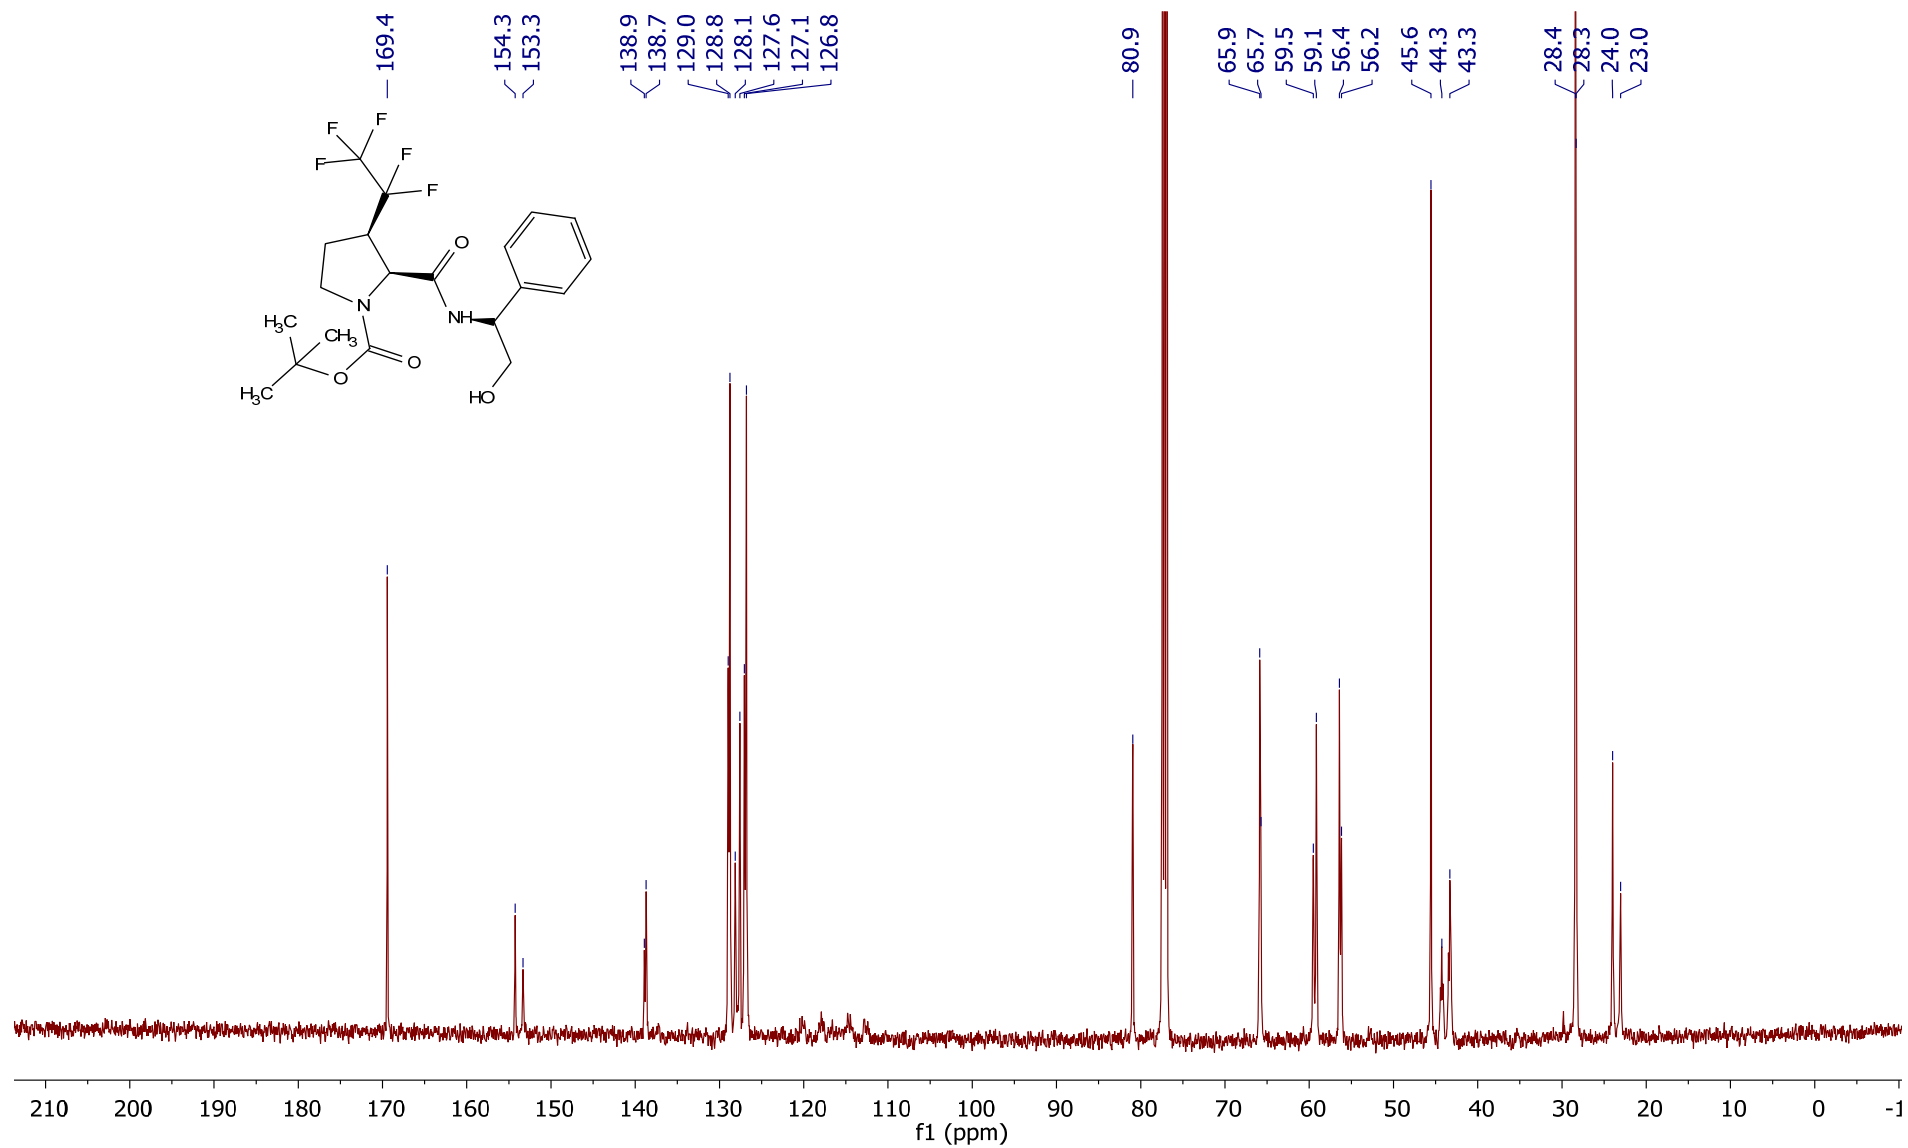

$^{19}\text{F}$  NMR spectrum of the compound (2*S*,3*R*)-**5b** (in  $\text{CDCl}_3$ ).

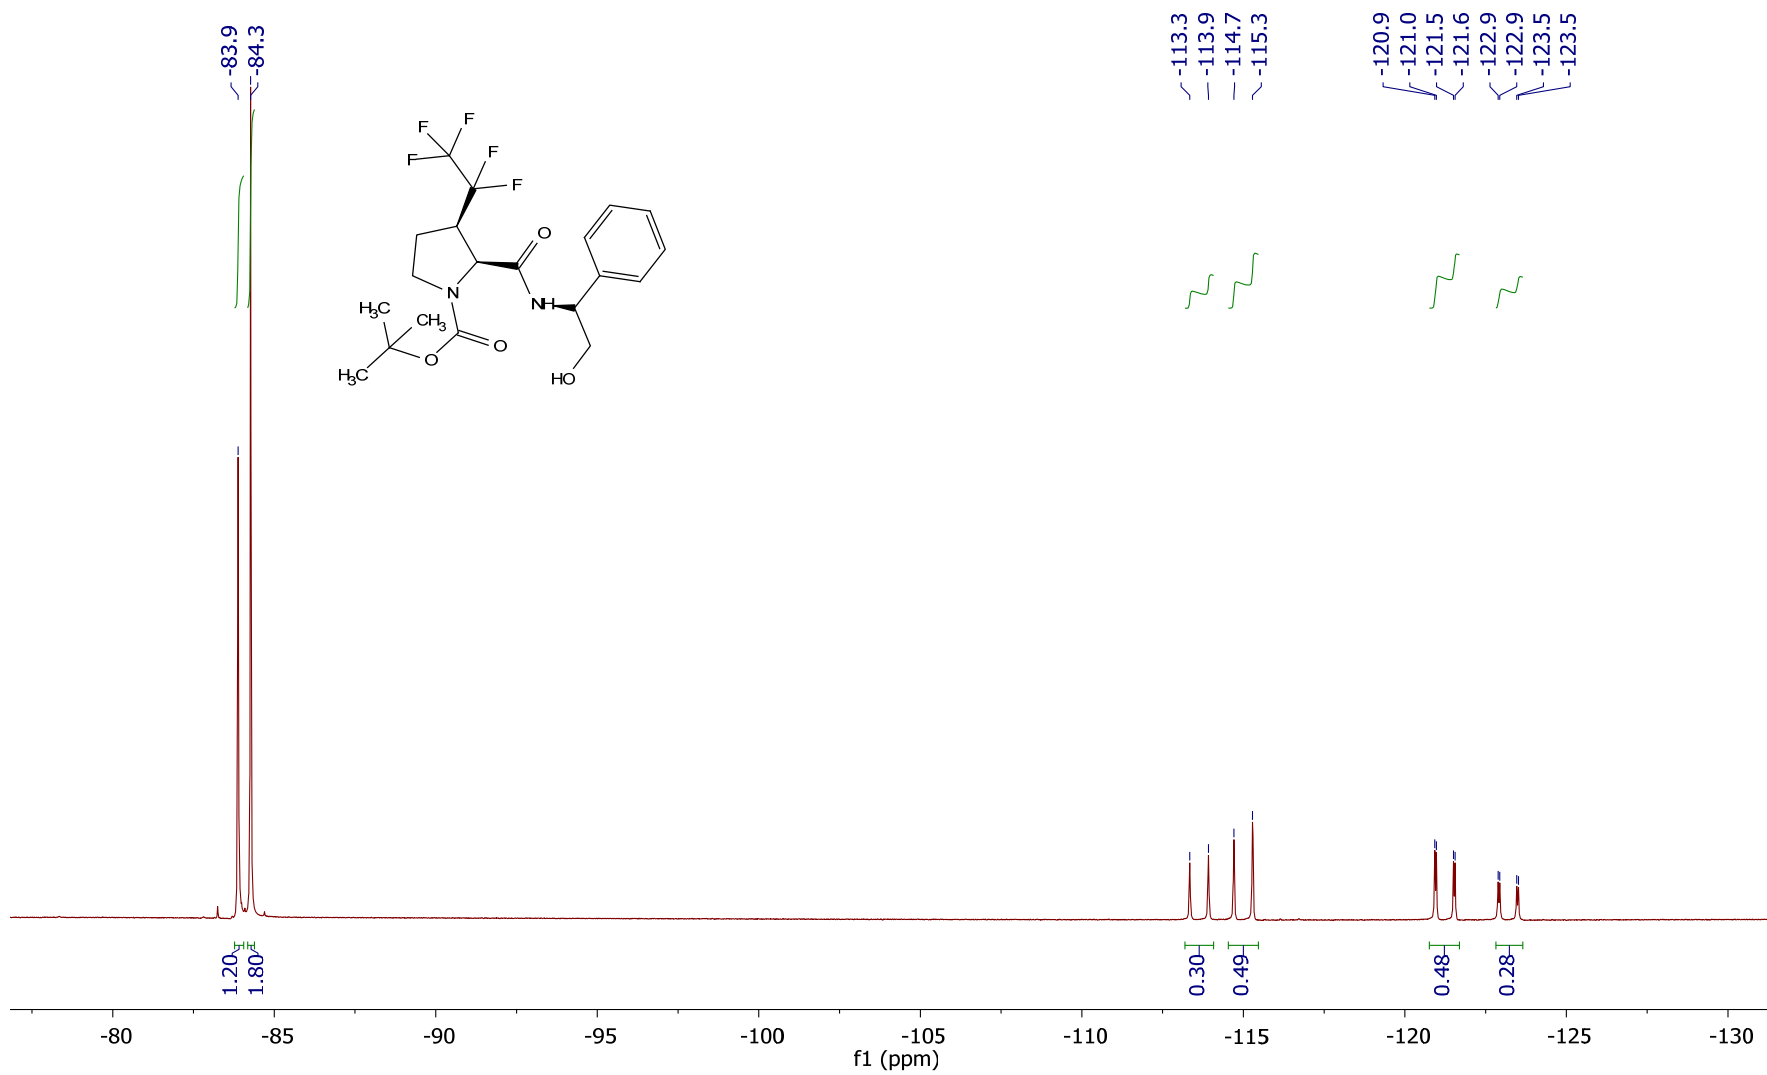



$^1\text{H}$  NMR spectrum of the compound (2*R*,3*S*)-**5b** (in  $\text{CDCl}_3$ ).

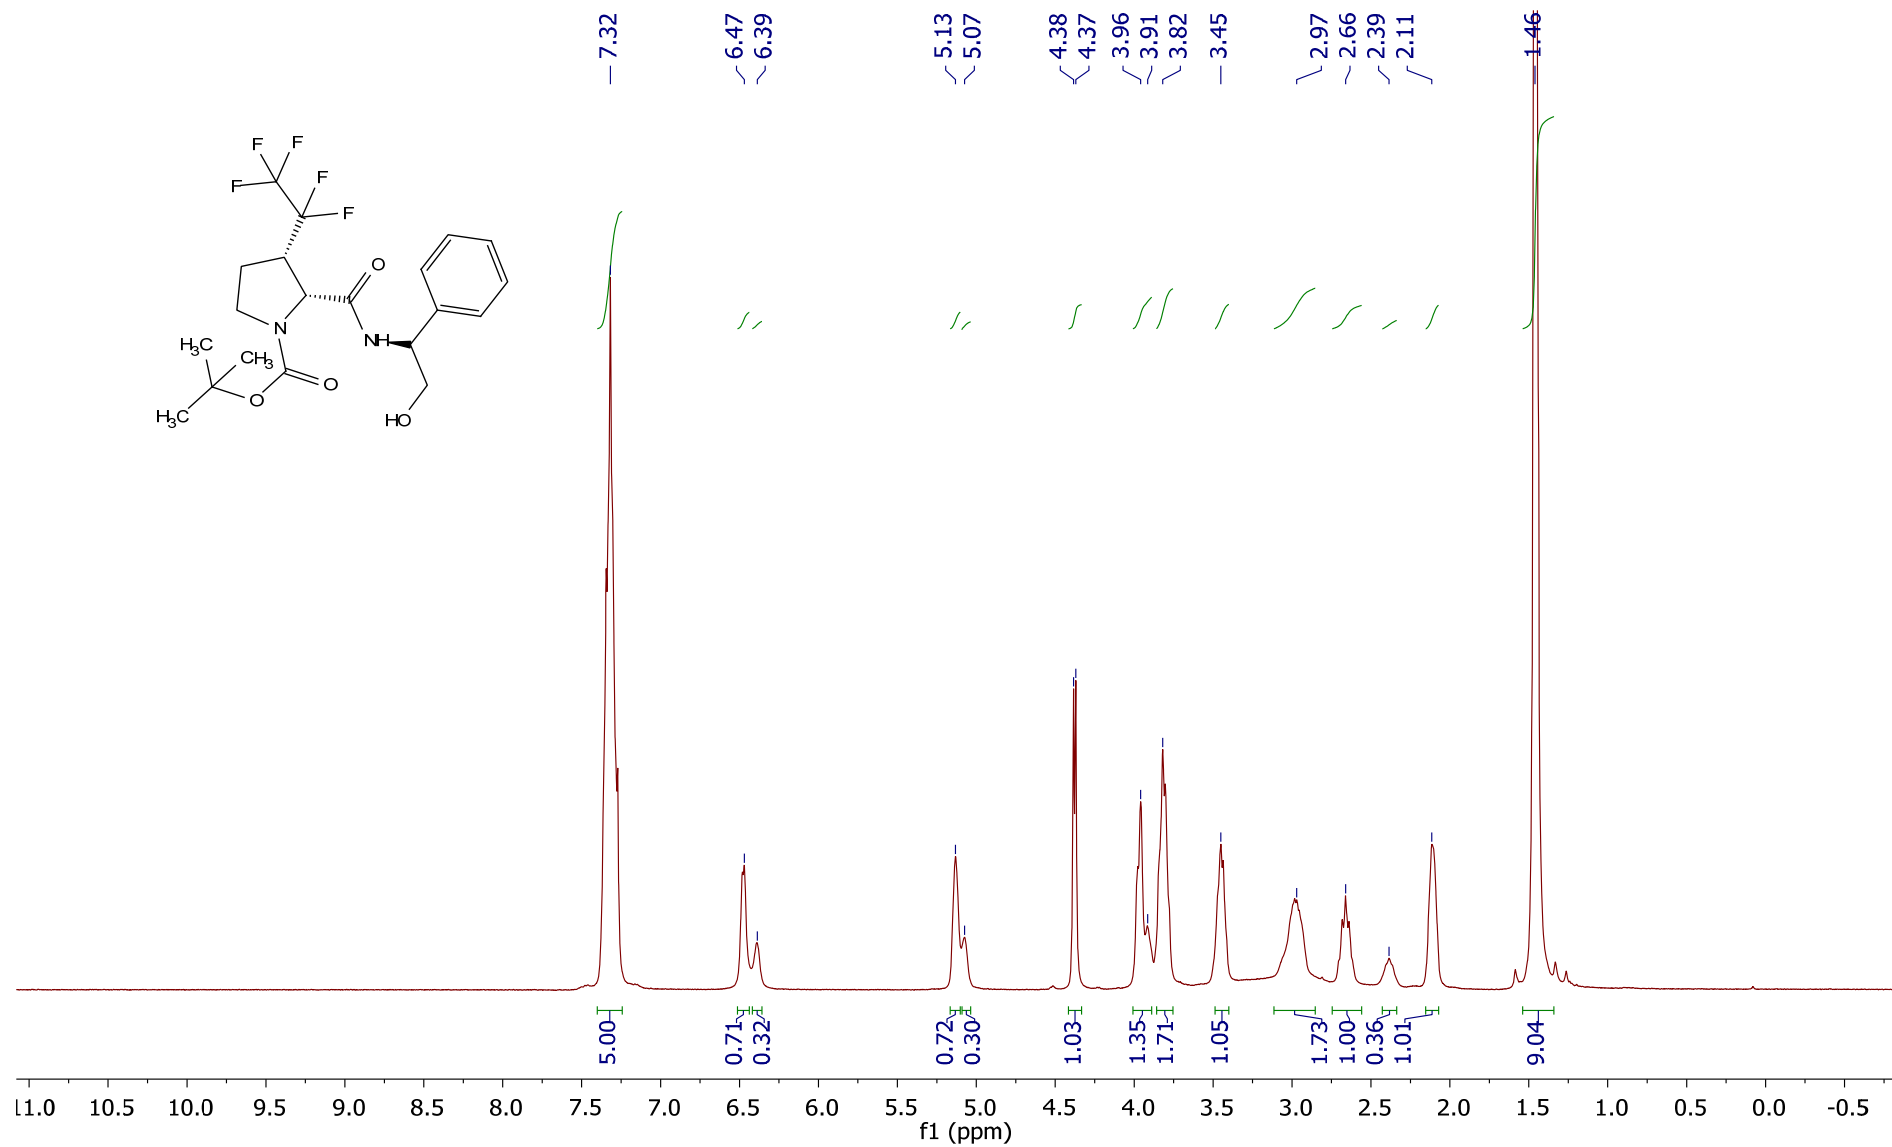

<sup>13</sup>C NMR spectrum of the compound (2*R*,3*S*)-**5b** (in CDCl<sub>3</sub>).

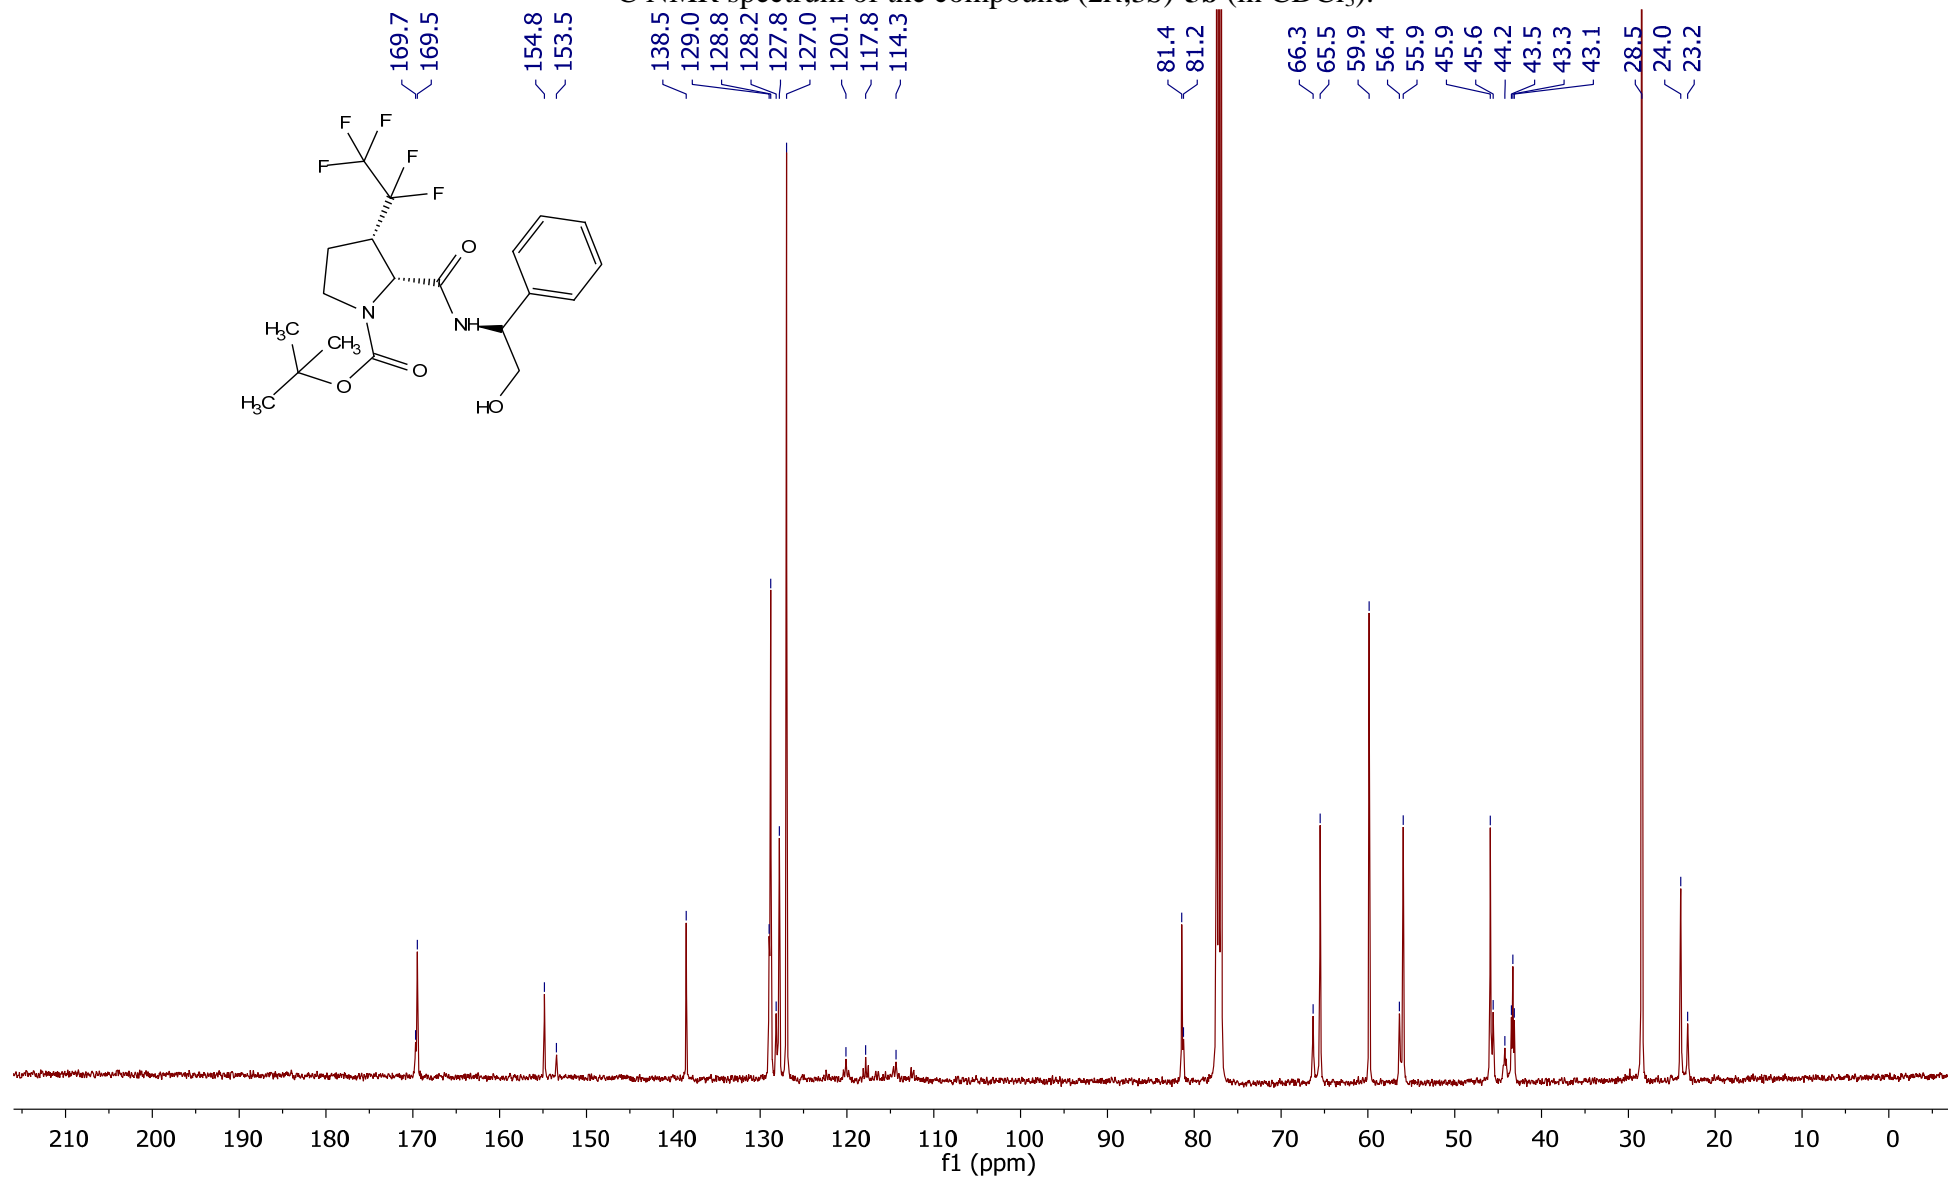

$^{19}\text{F}$  NMR spectrum of the compound (2*R*,3*S*)-**5b** (in  $\text{CDCl}_3$ ).

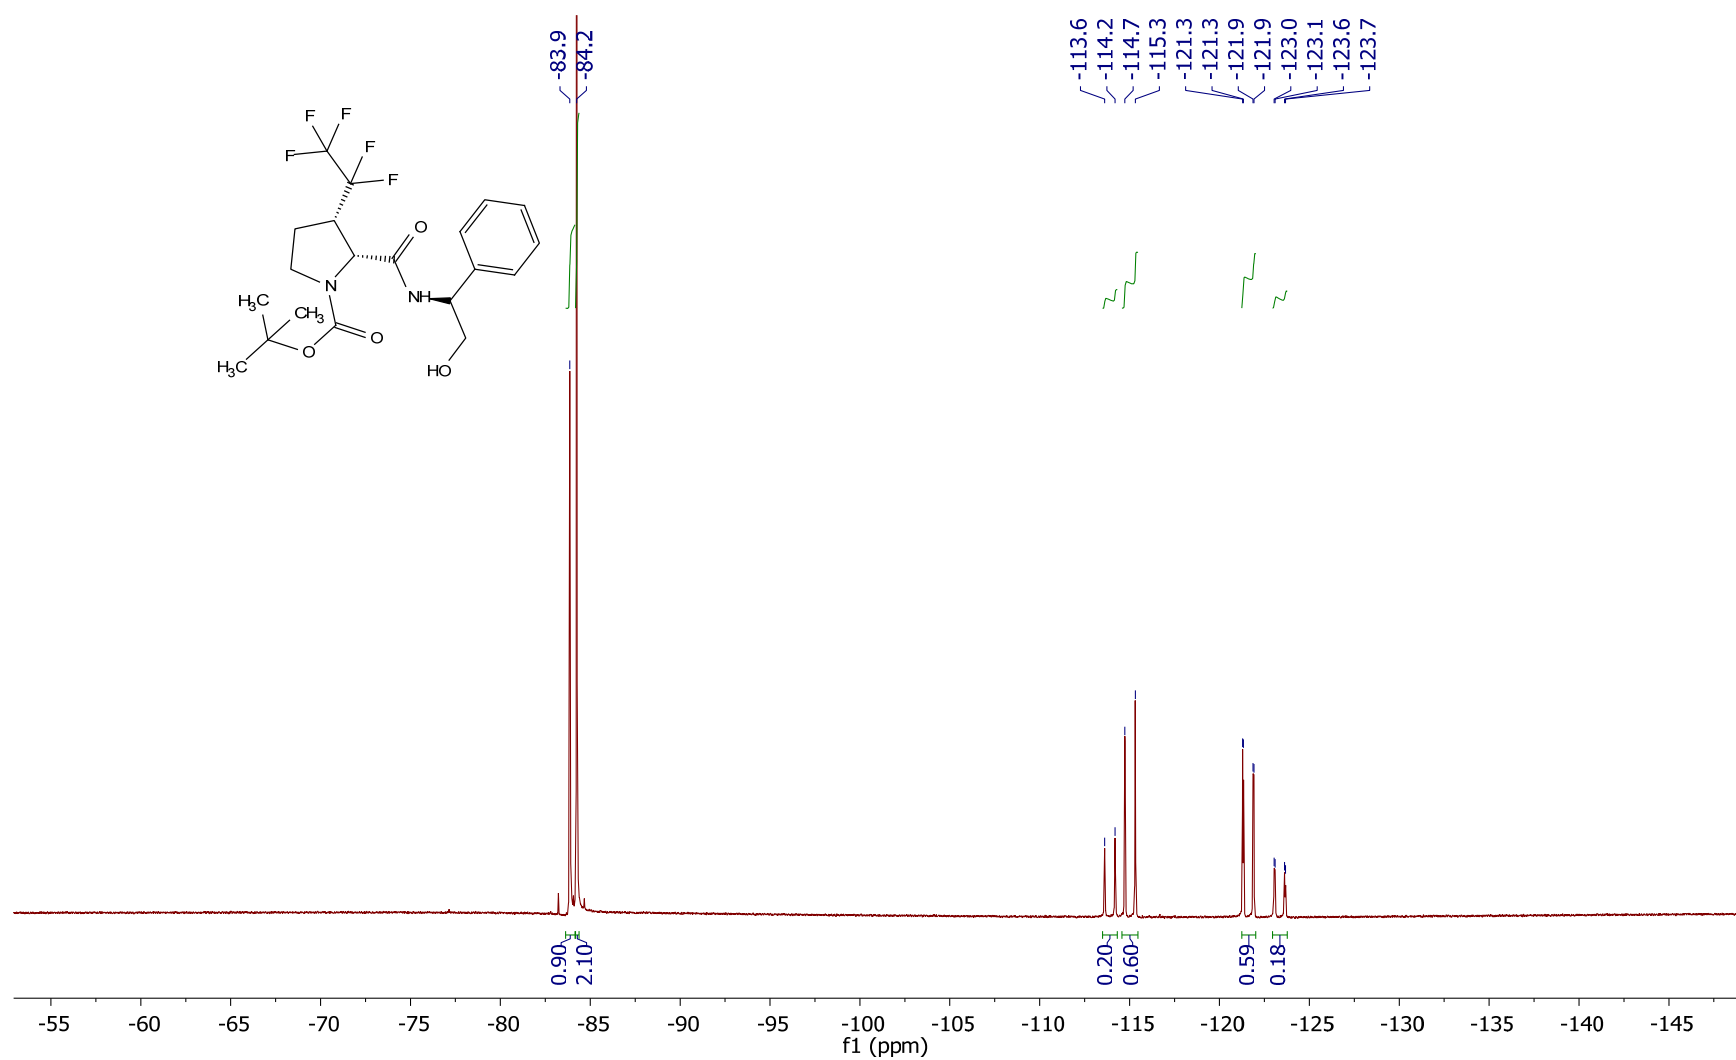

$^1\text{H}$  NMR spectrum of the compound (2*S*,3*S*)-**6a** (in  $\text{CDCl}_3$ ).

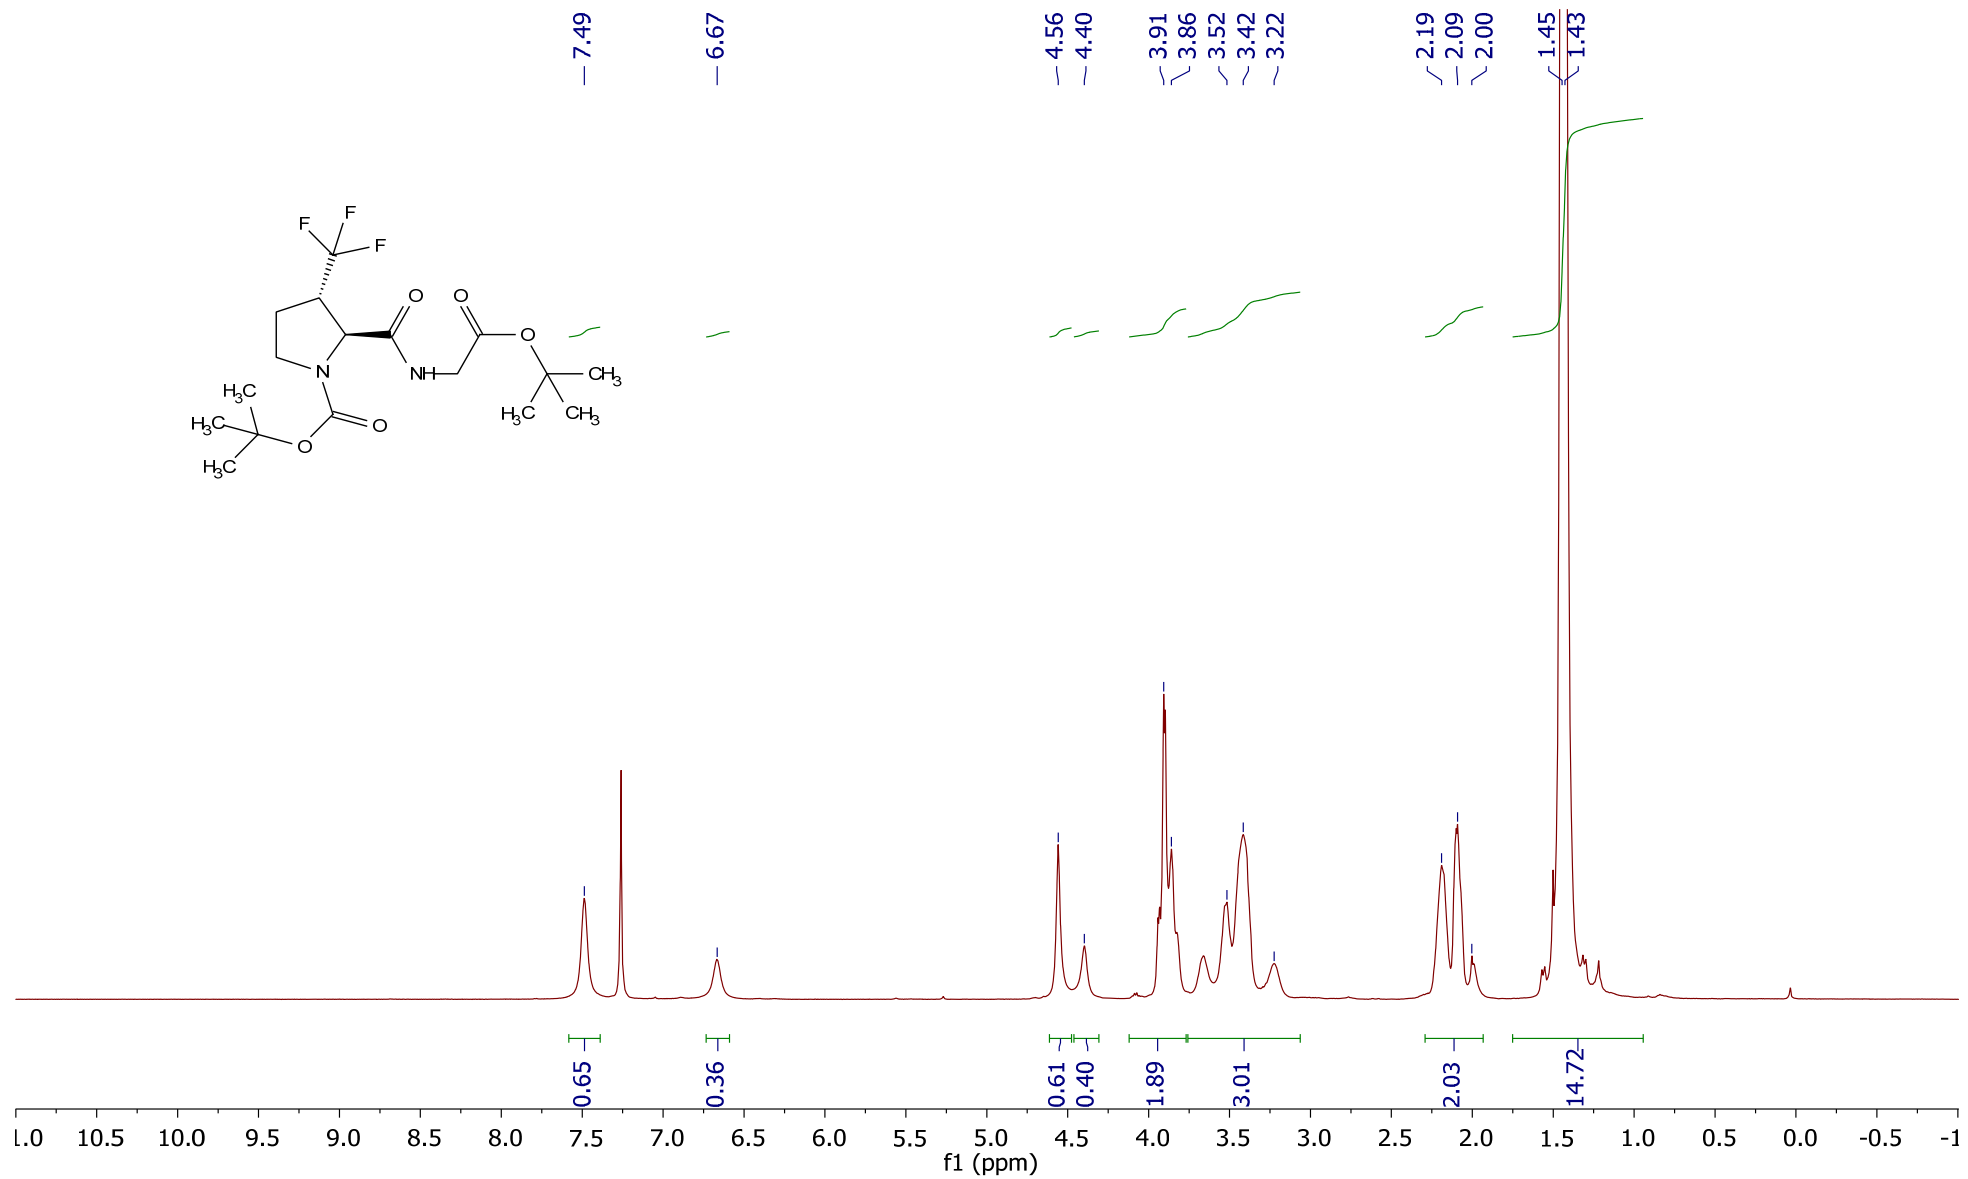

<sup>13</sup>C NMR spectrum of the compound (2*S*,3*S*)-**6a** (in CDCl<sub>3</sub>).

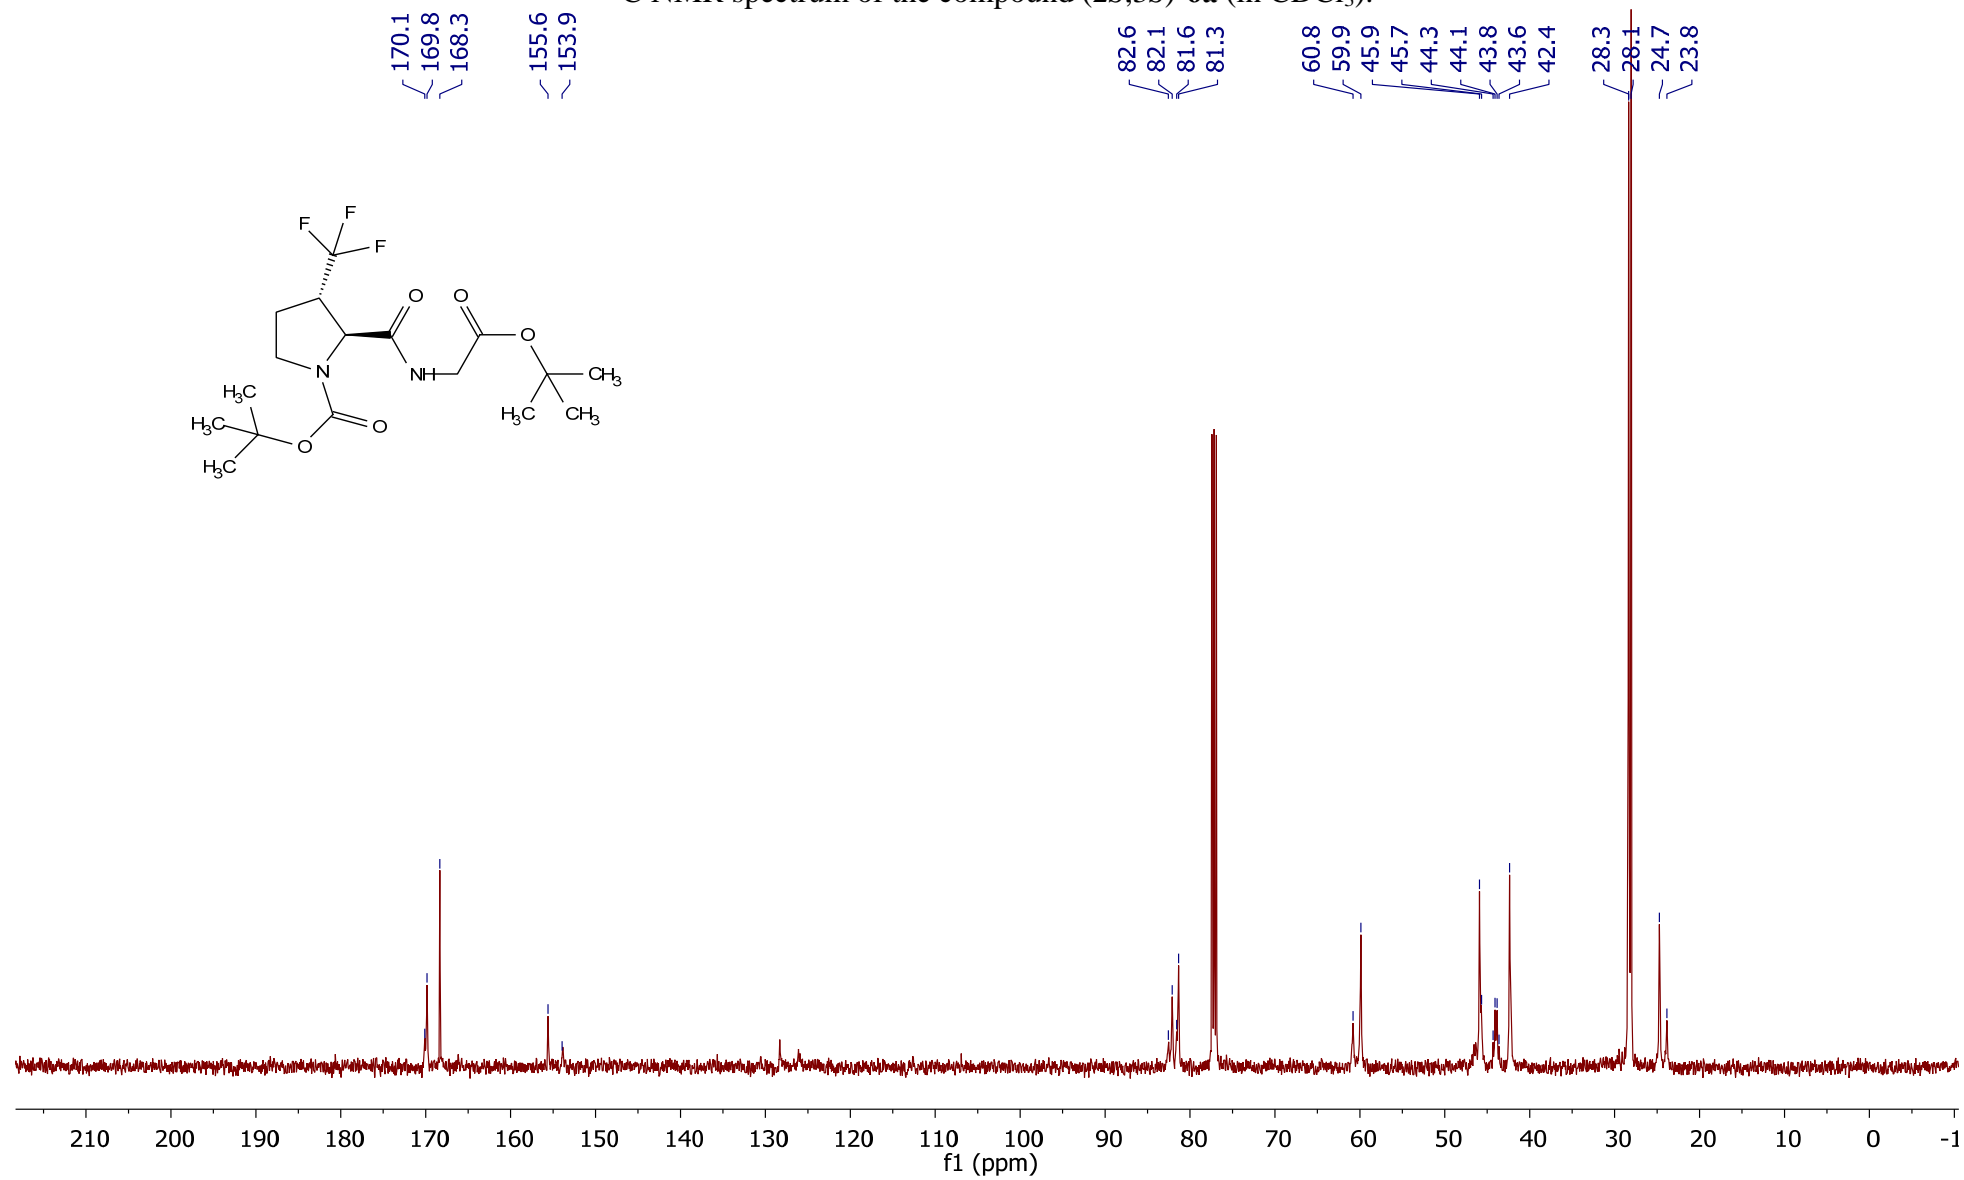

$^{19}\text{F}$  NMR spectrum of the compound (2*S*,3*S*)-**6a** (in  $\text{CDCl}_3$ ).

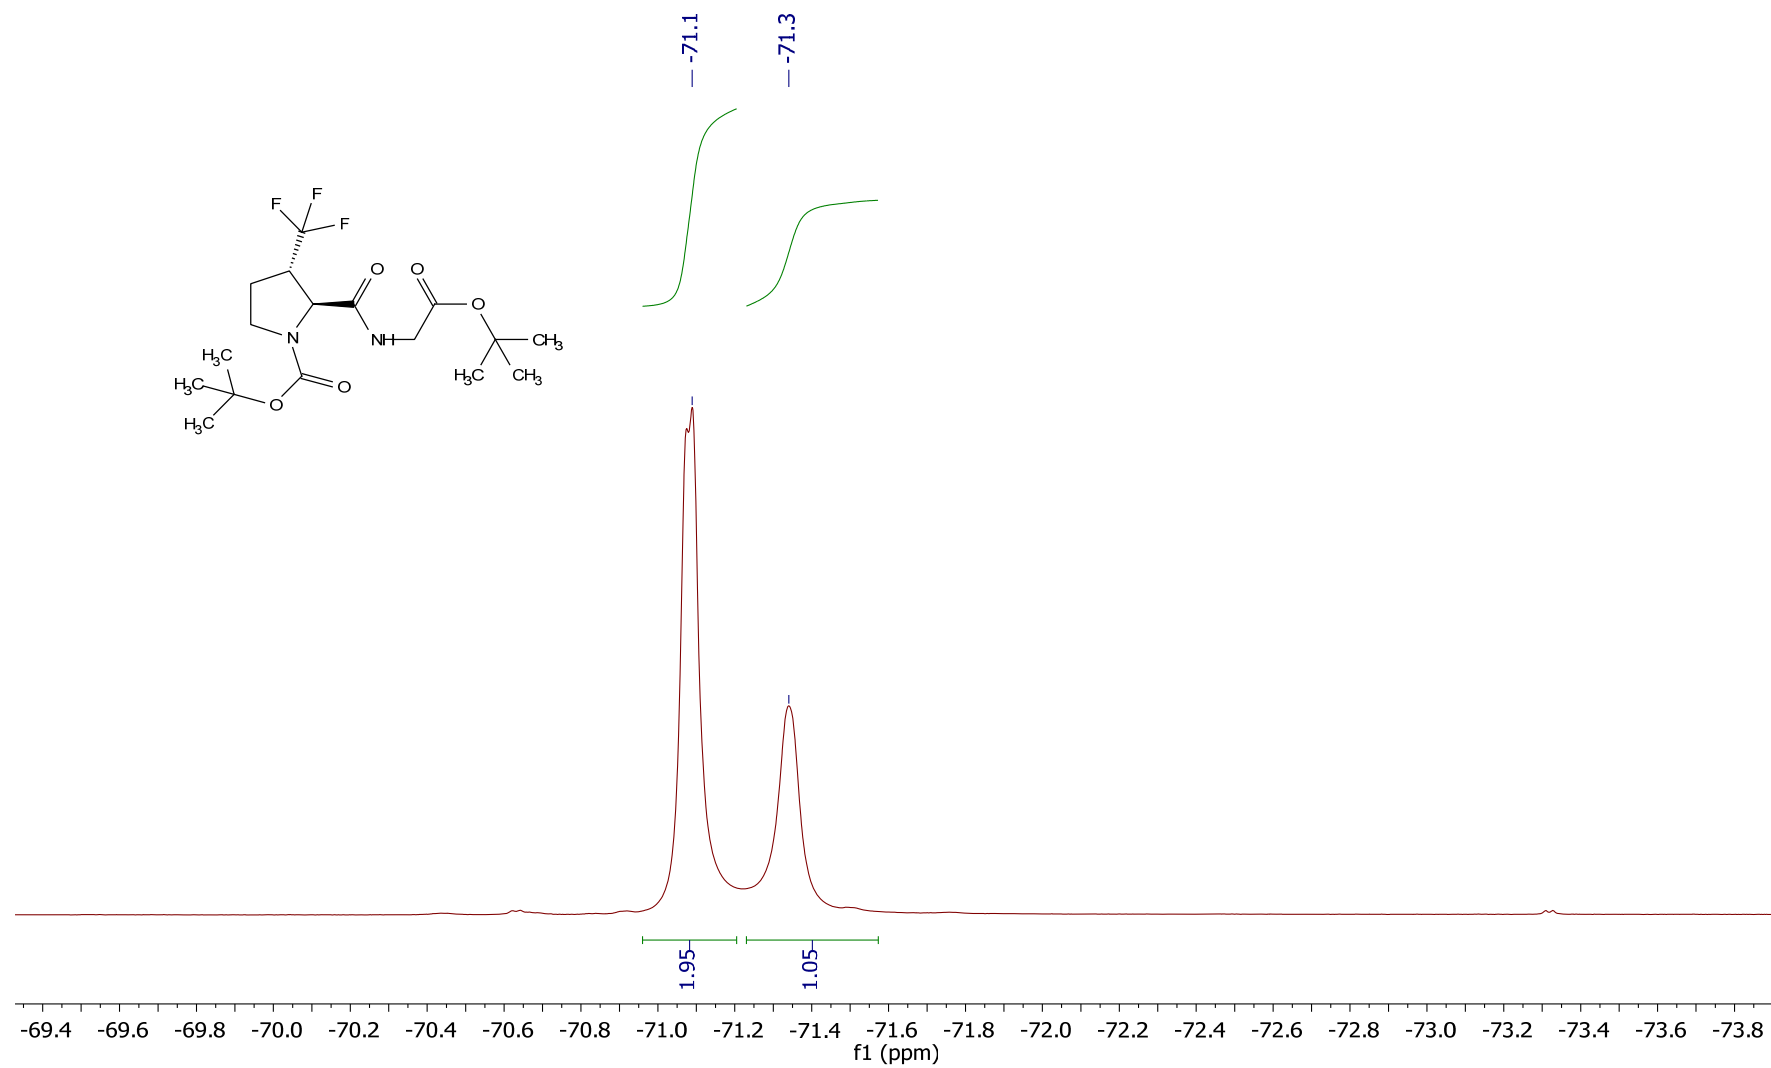

<sup>1</sup>H NMR spectrum of the compound (2*R*,3*R*)-**6a** (in CDCl<sub>3</sub>).

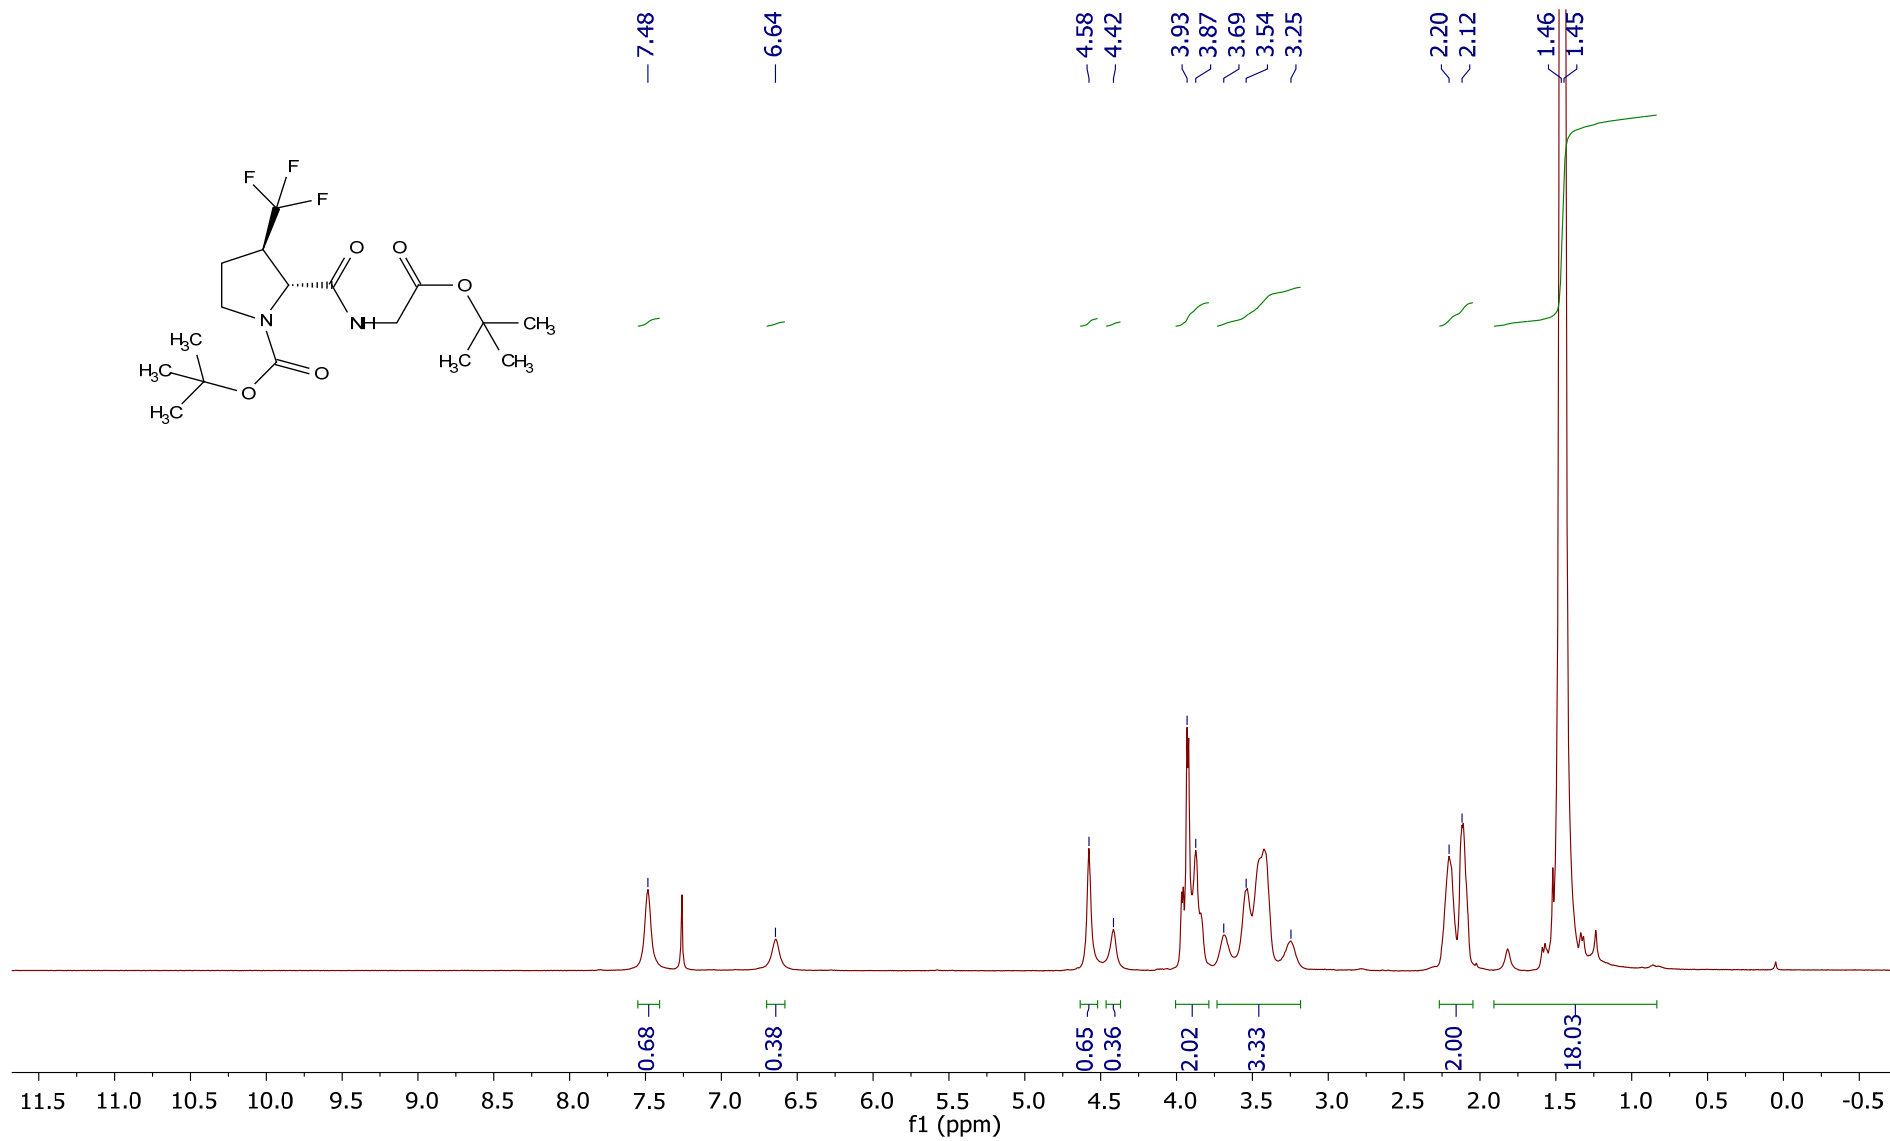

$^{13}\text{C}$  NMR spectrum of the compound (2*R*,3*R*)-**6a** (in  $\text{CDCl}_3$ ).

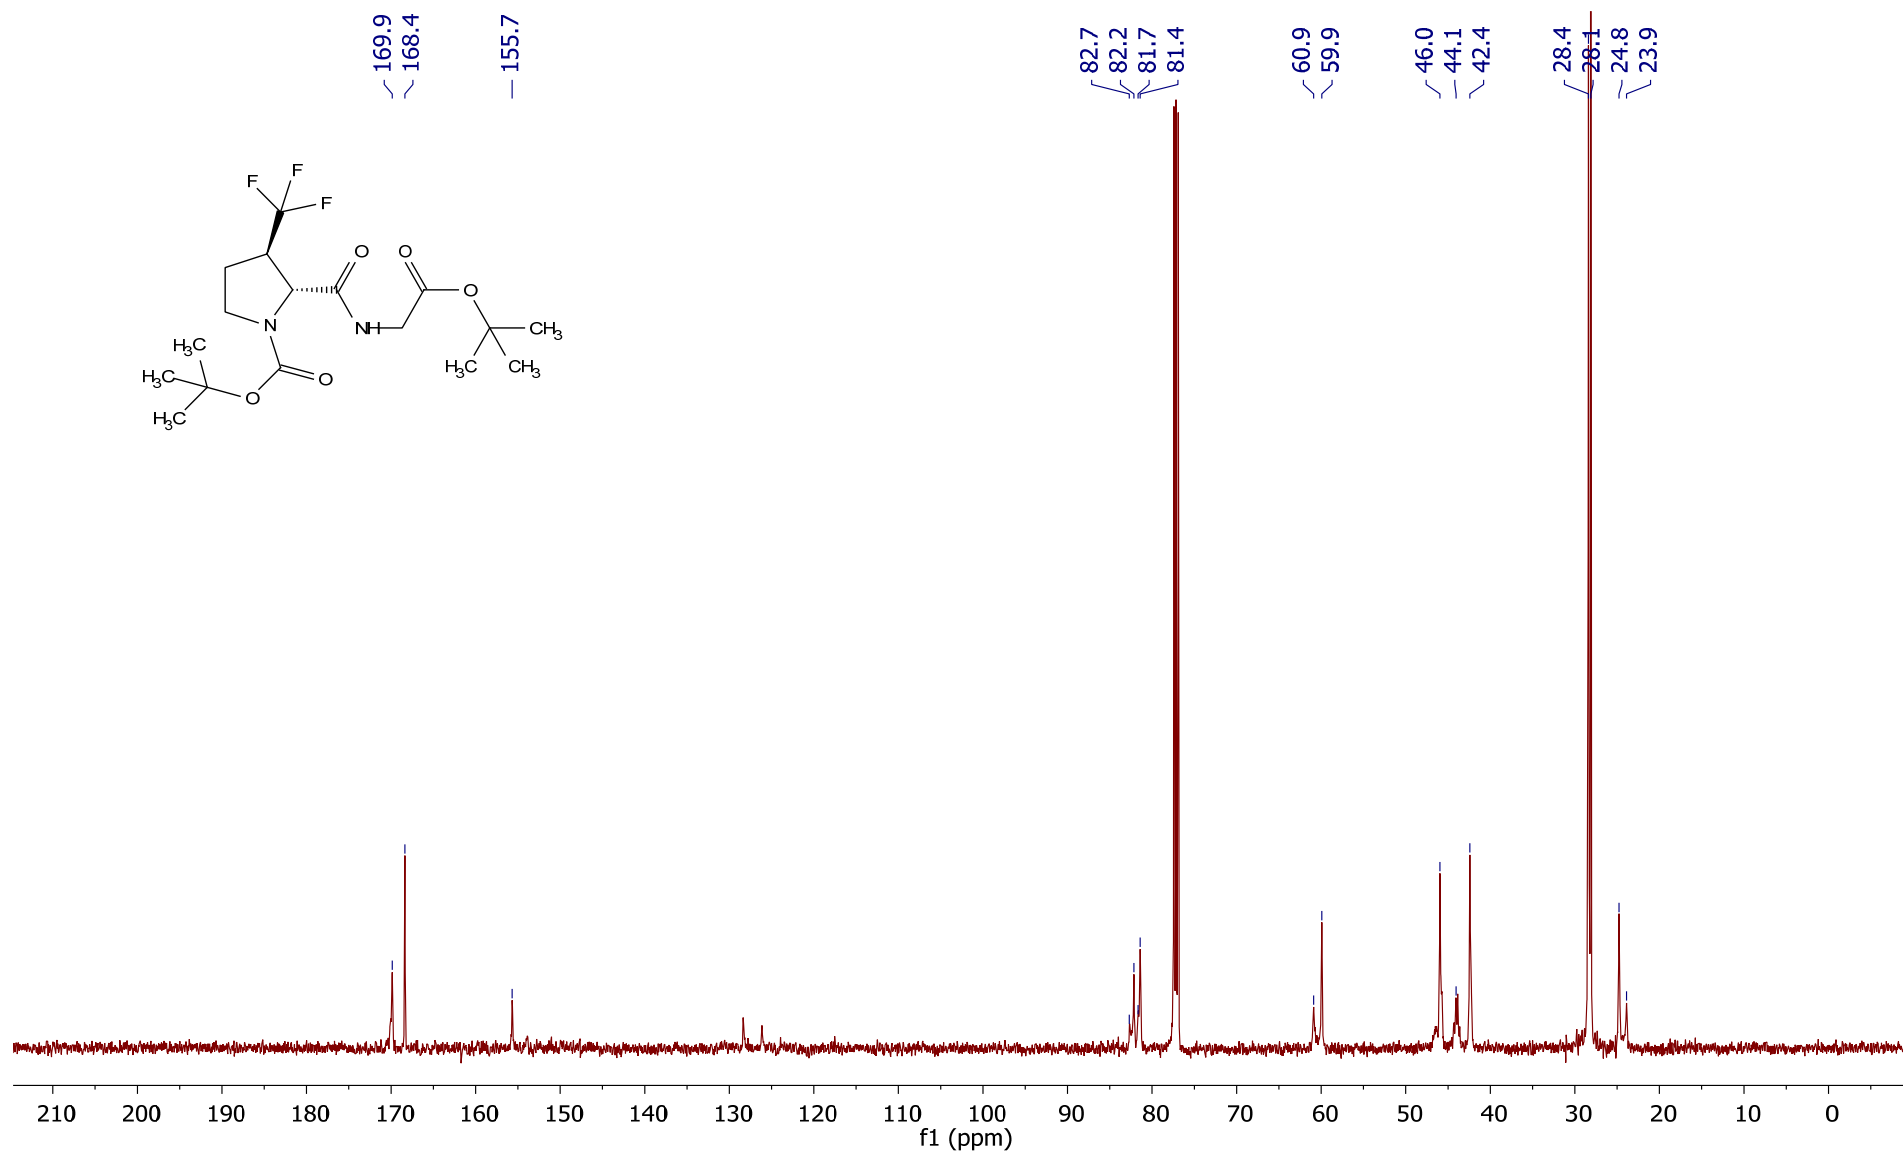



$^{19}\text{F}$  NMR spectrum of the compound (2*R*,3*R*)-**6a** (in  $\text{CDCl}_3$ ).

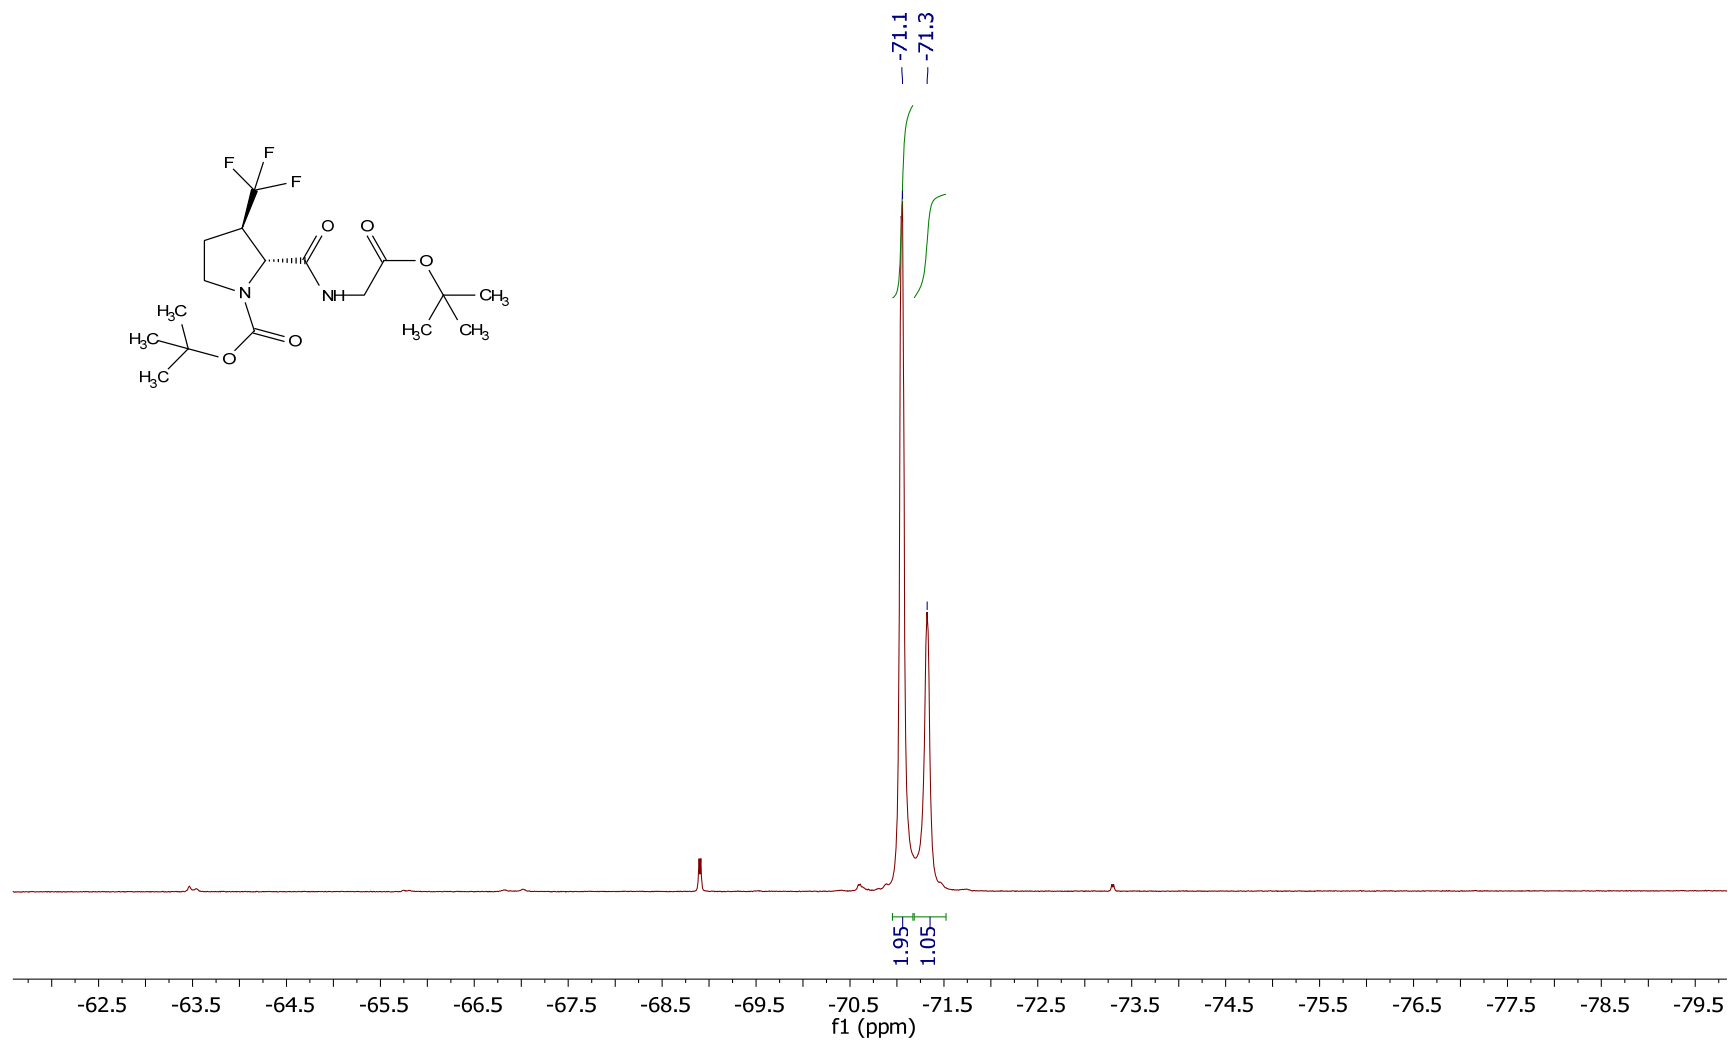

$^1\text{H}$  NMR spectrum of the compound (2*S*,3*S*)-**6b** (in  $\text{CDCl}_3$ ).

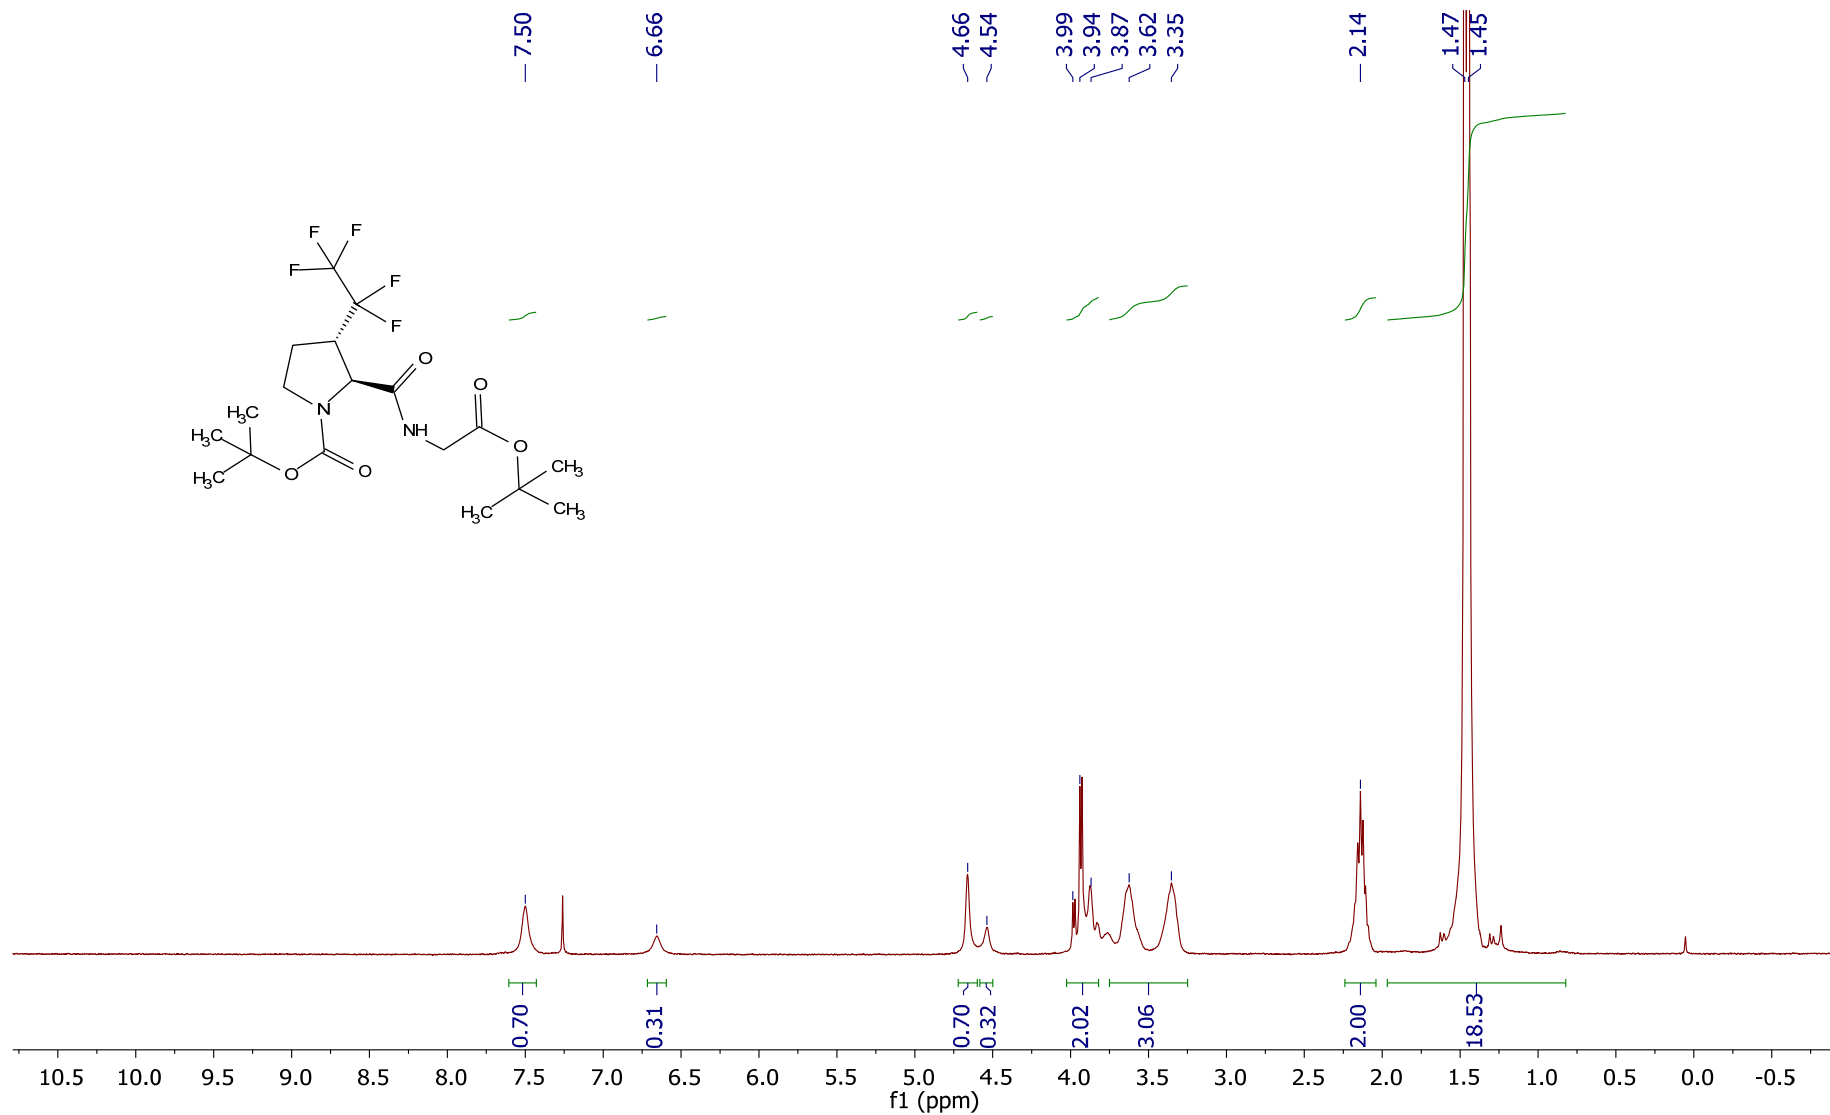

<sup>13</sup>C NMR spectrum of the compound (2*S*,3*S*)-**6b** (in CDCl<sub>3</sub>).

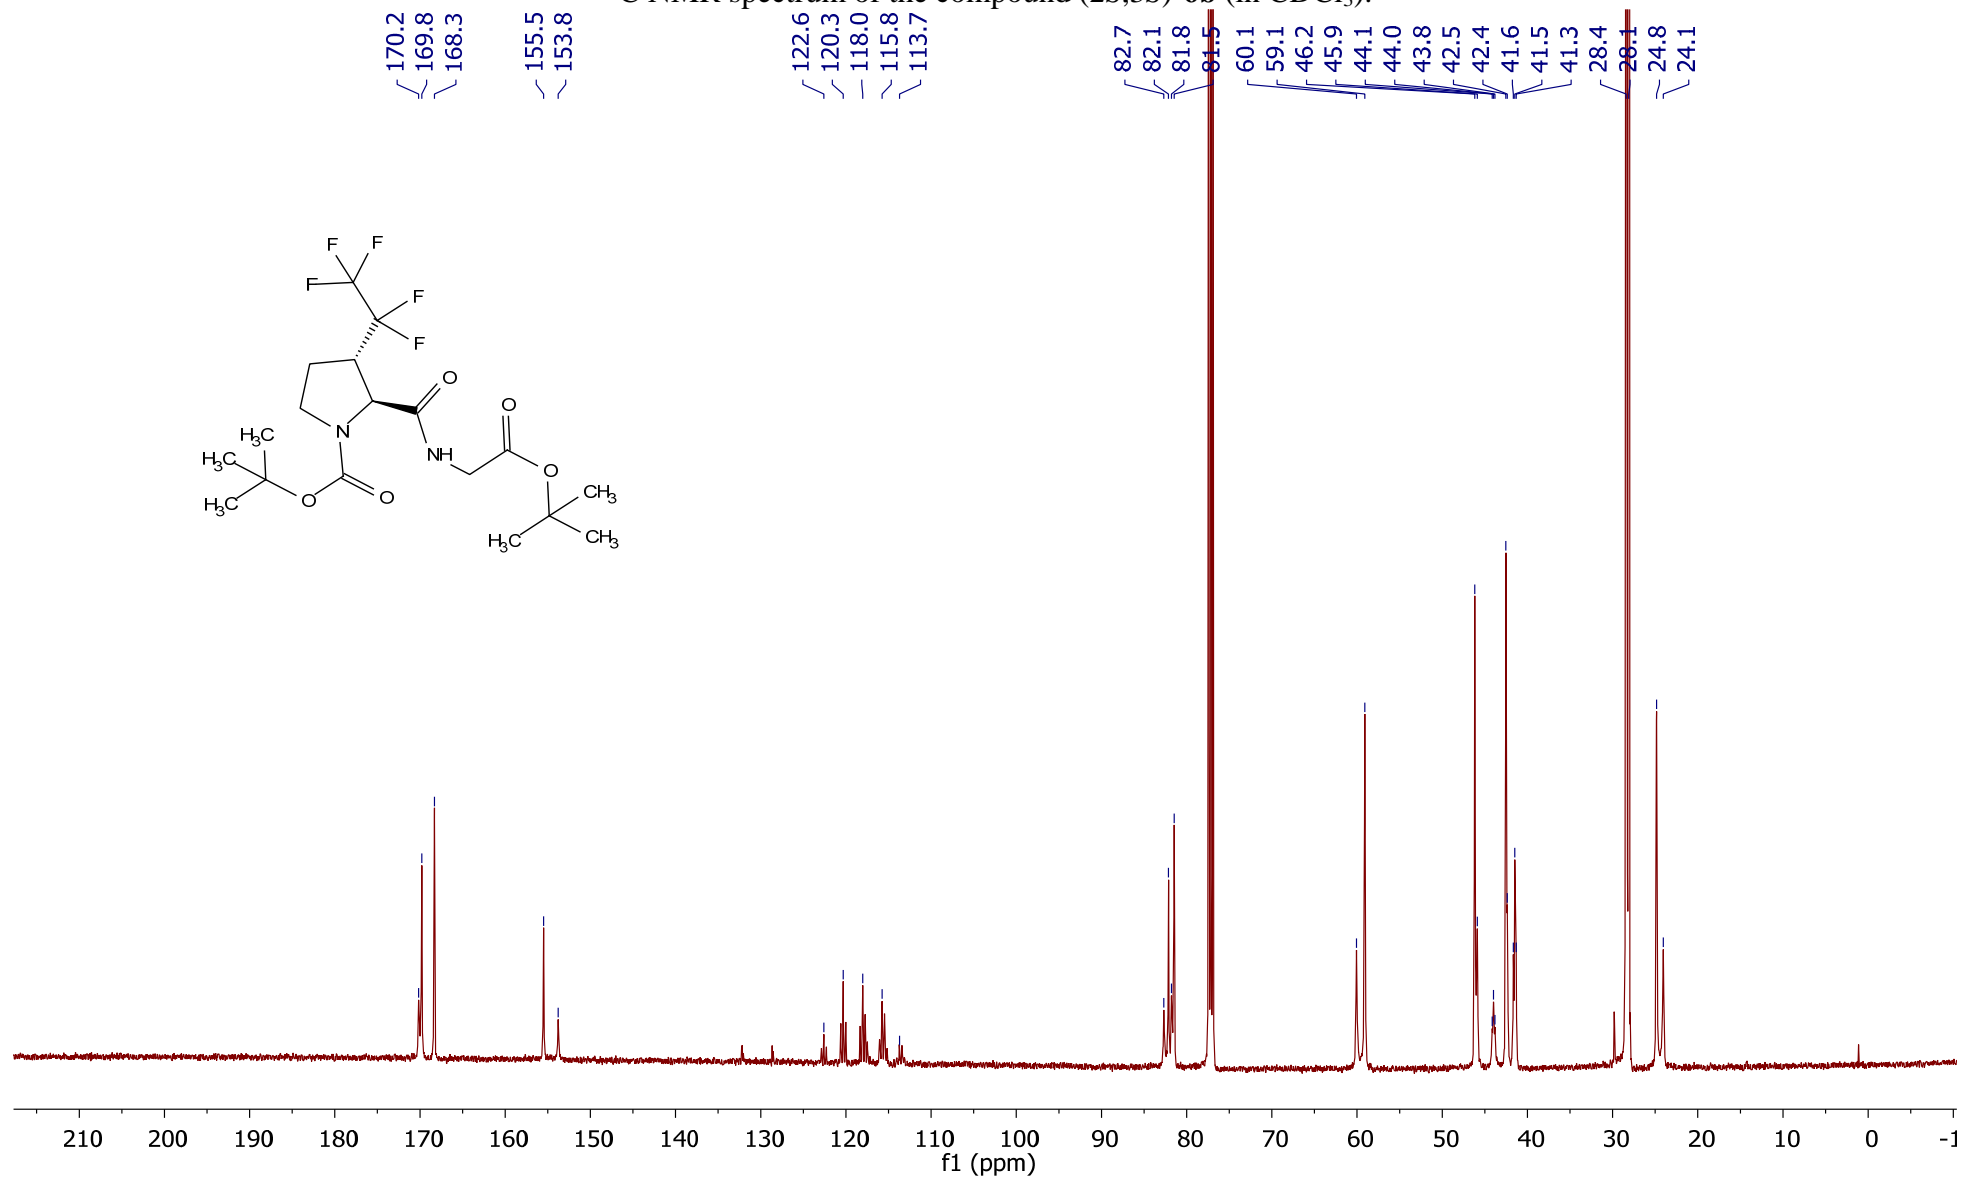

$^{19}\text{F}$  NMR spectrum of the compound (2*S*,3*S*)-**6b** (in  $\text{CDCl}_3$ ).

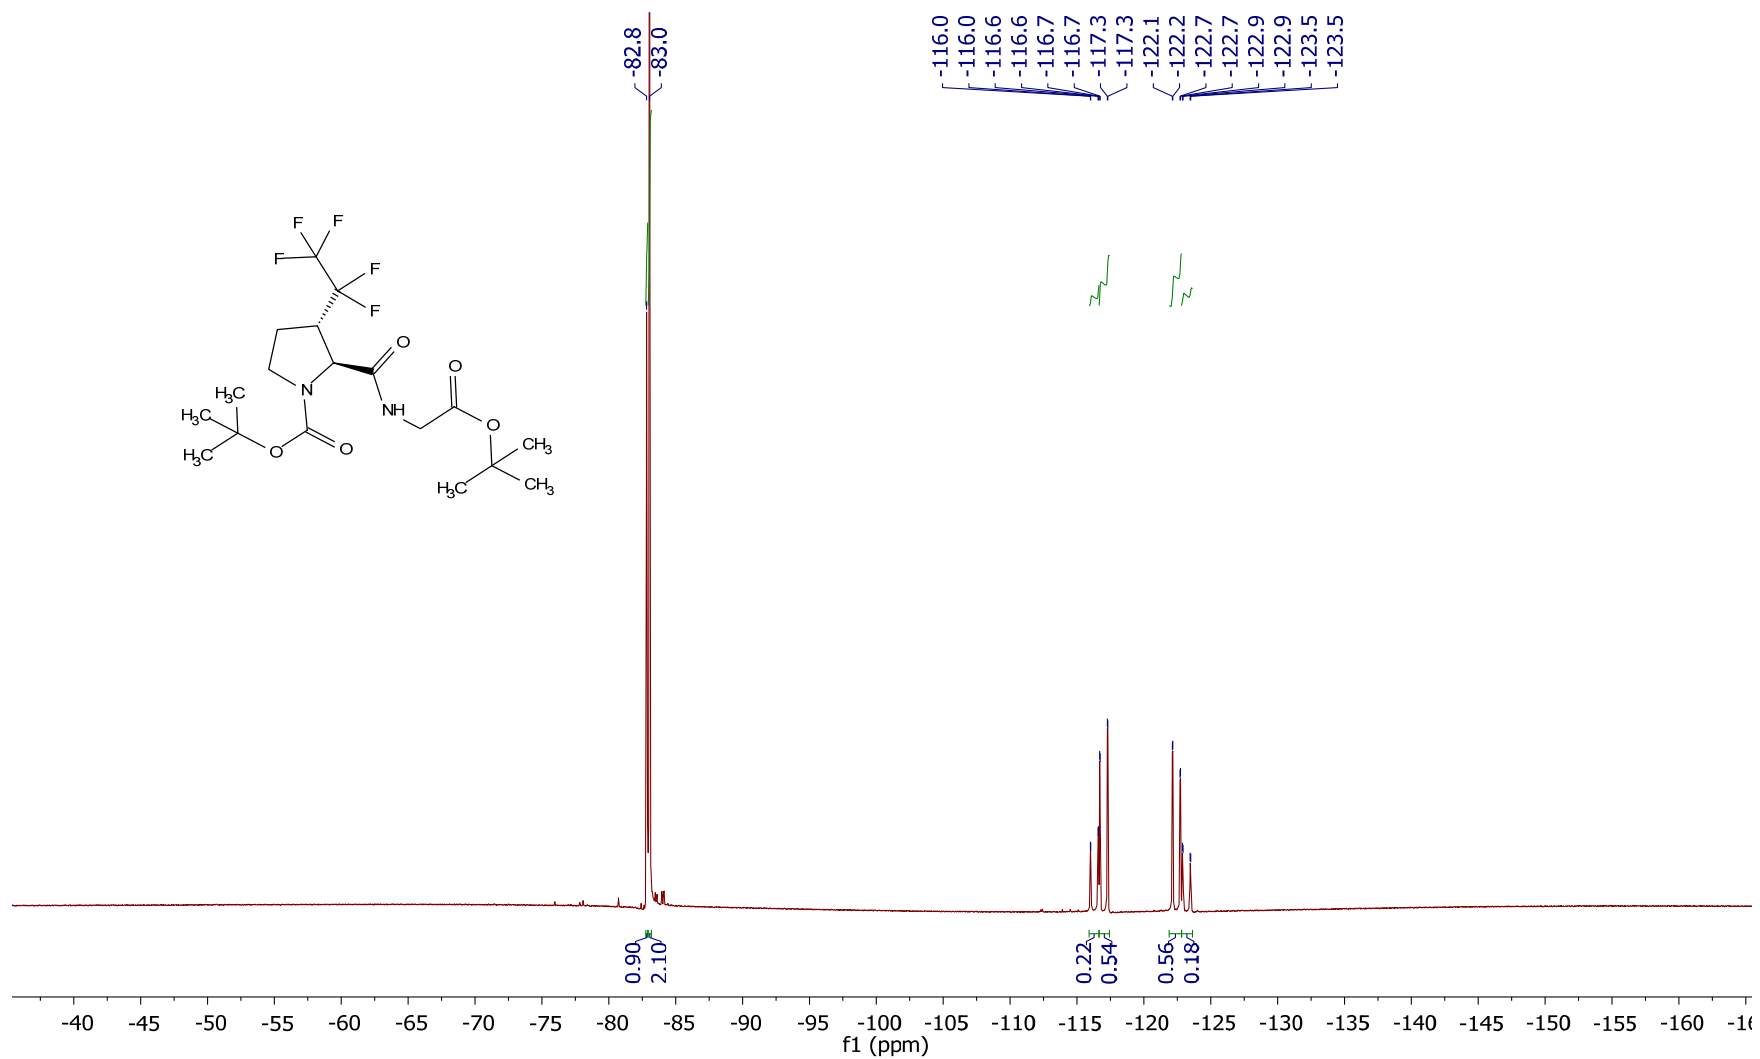

<sup>1</sup>H NMR spectrum of the compound (2*R*,3*R*)-**6b** (in CDCl<sub>3</sub>).

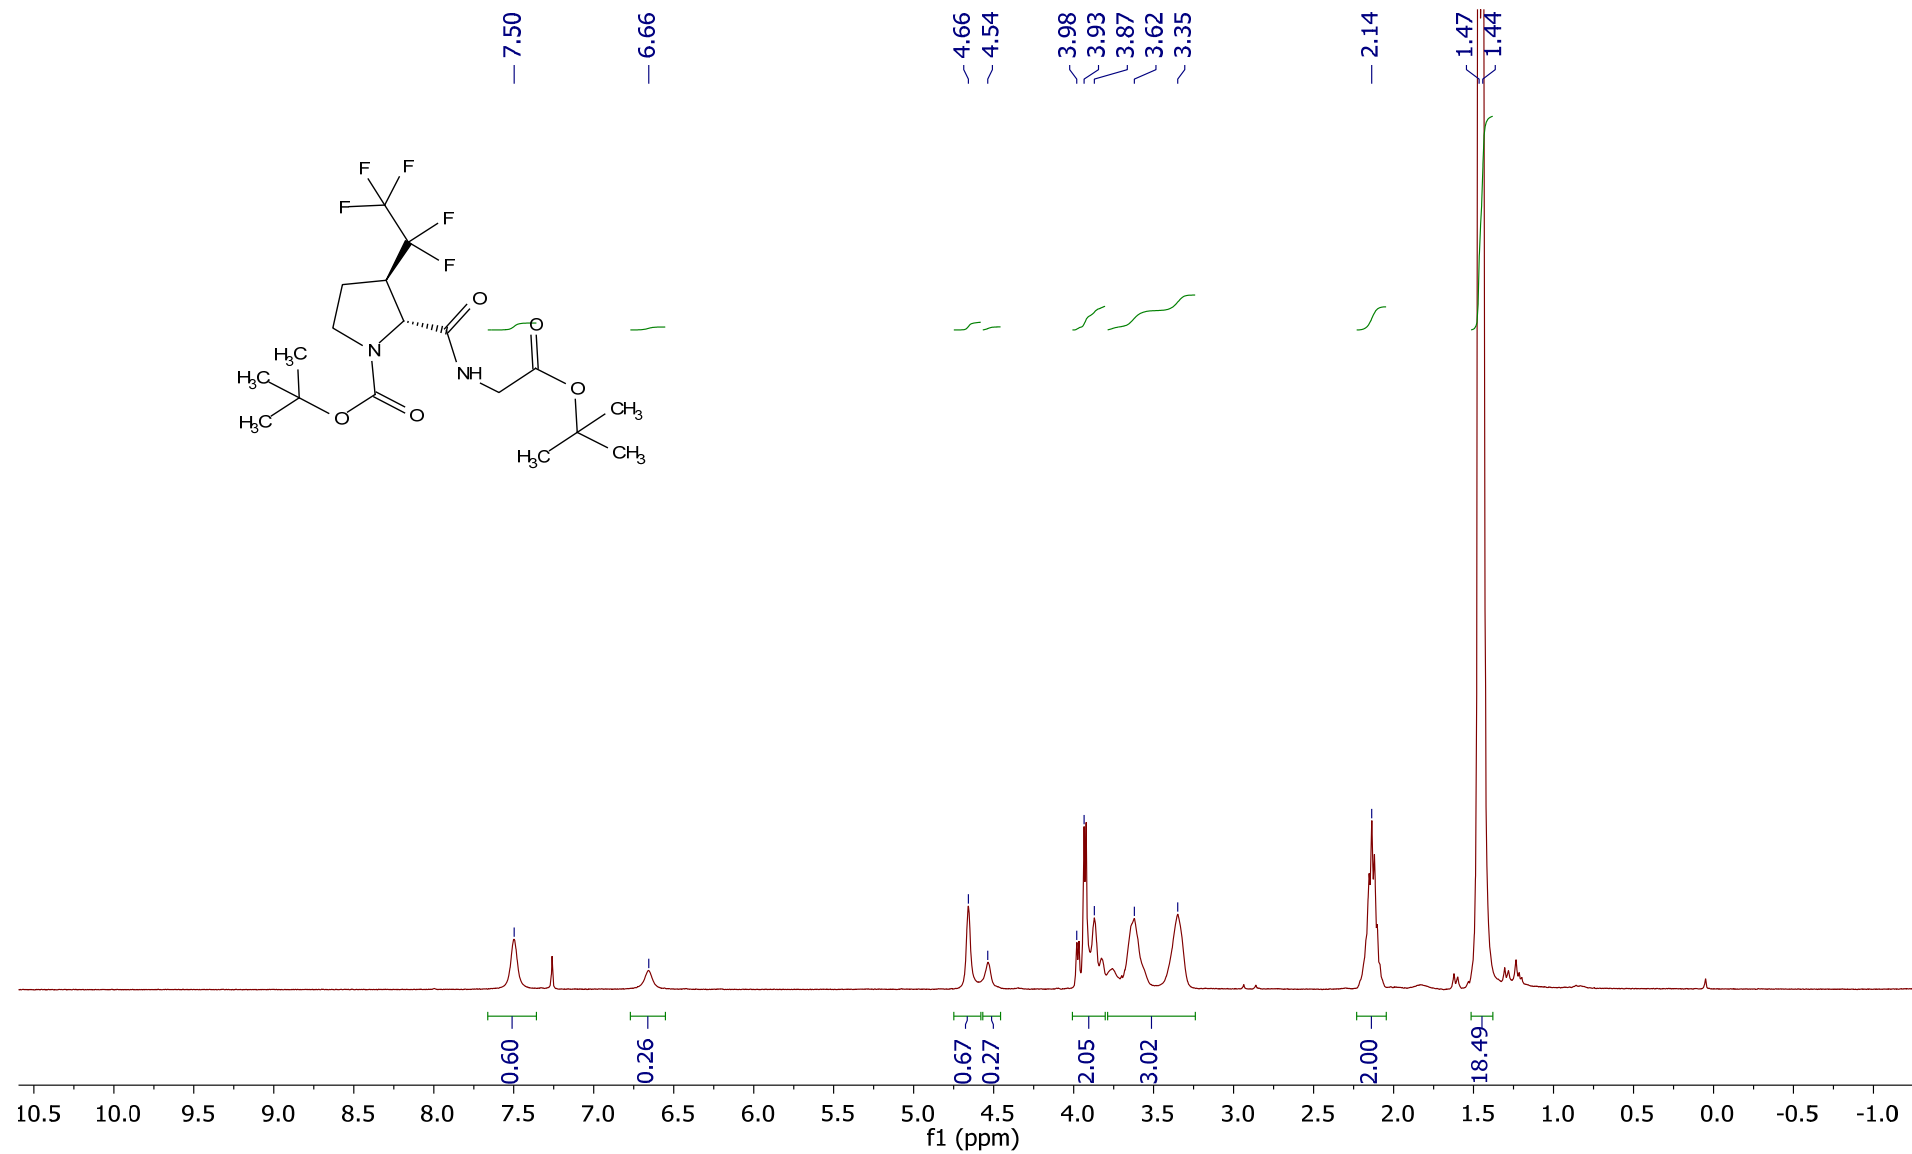

$^{13}\text{C}$  NMR spectrum of the compound (2*R*,3*R*)-**6b** (in  $\text{CDCl}_3$ ).

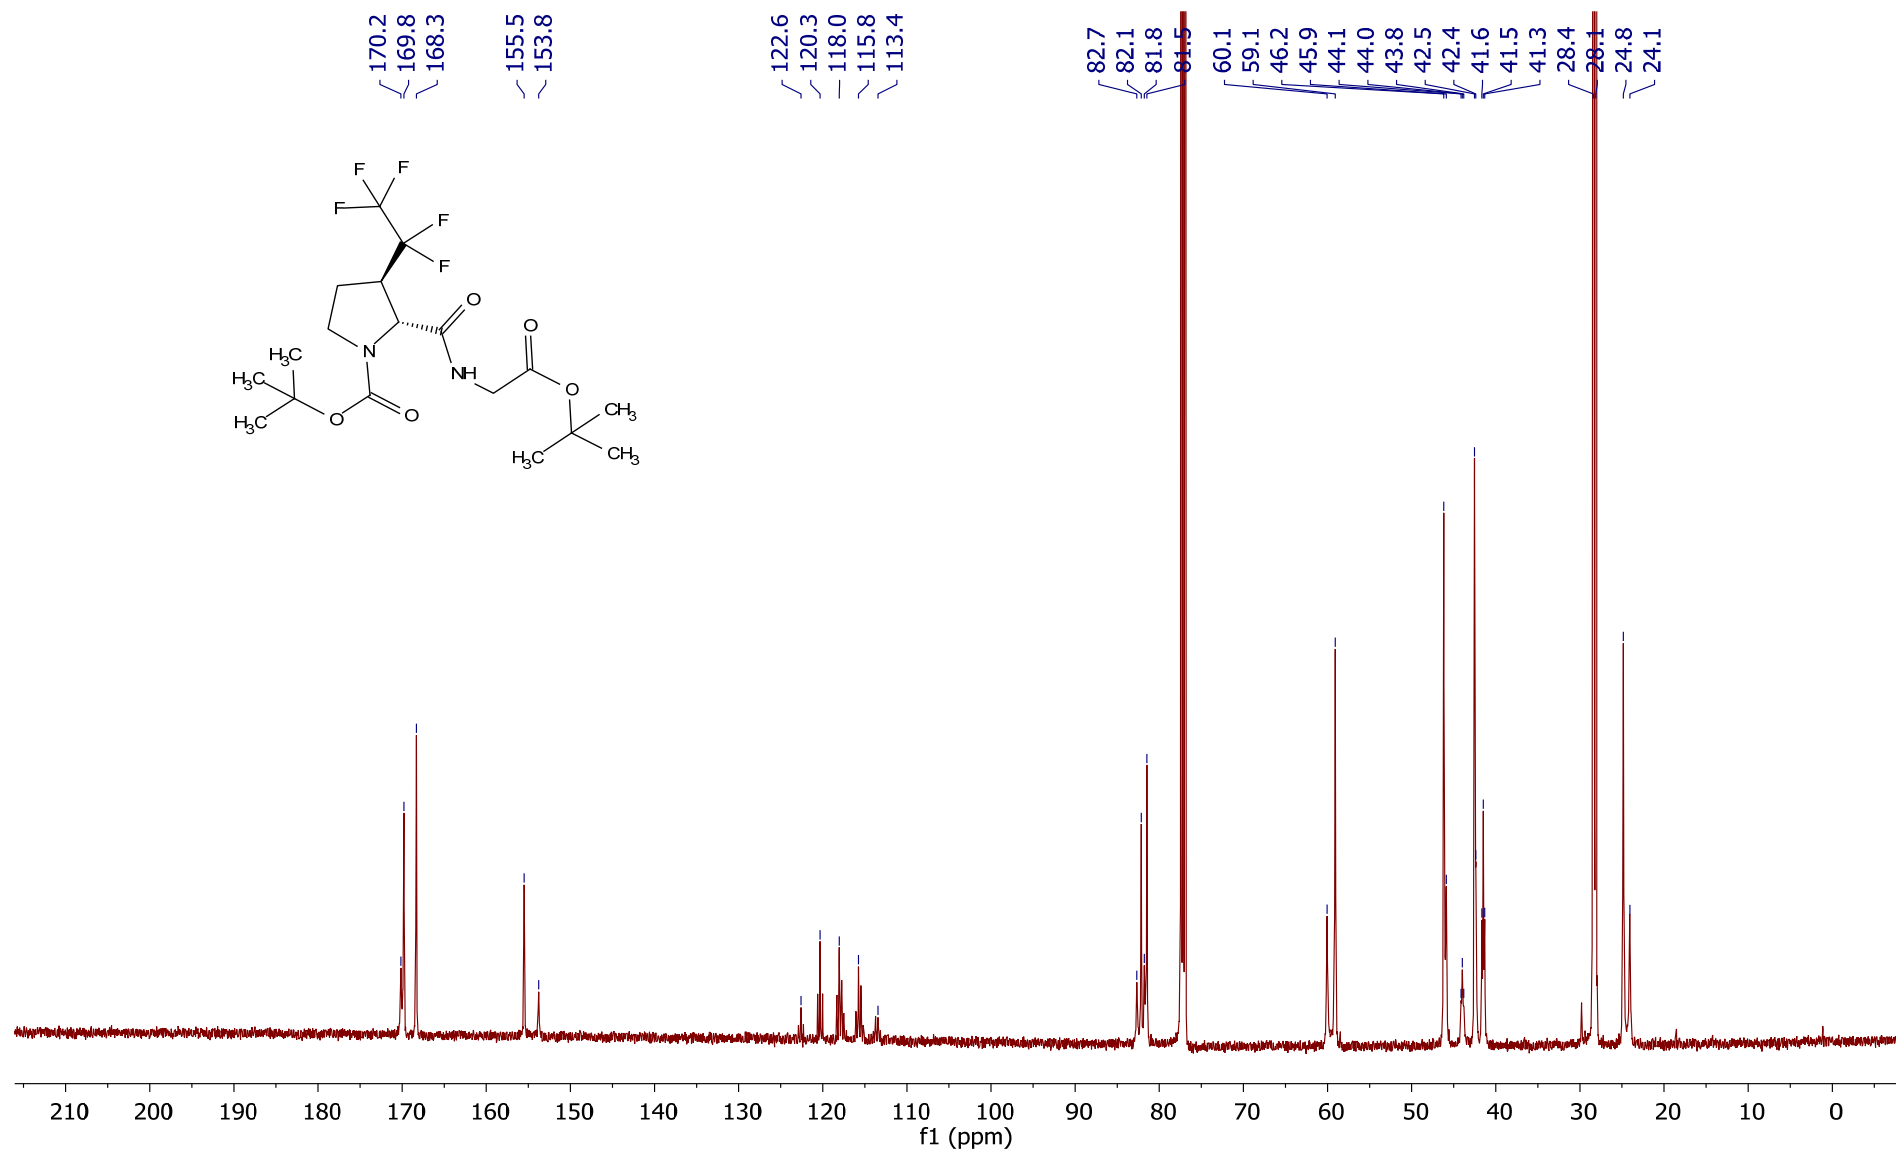

$^{19}\text{F}$  NMR spectrum of the compound (2*R*,3*R*)-**6b** (in  $\text{CDCl}_3$ ).

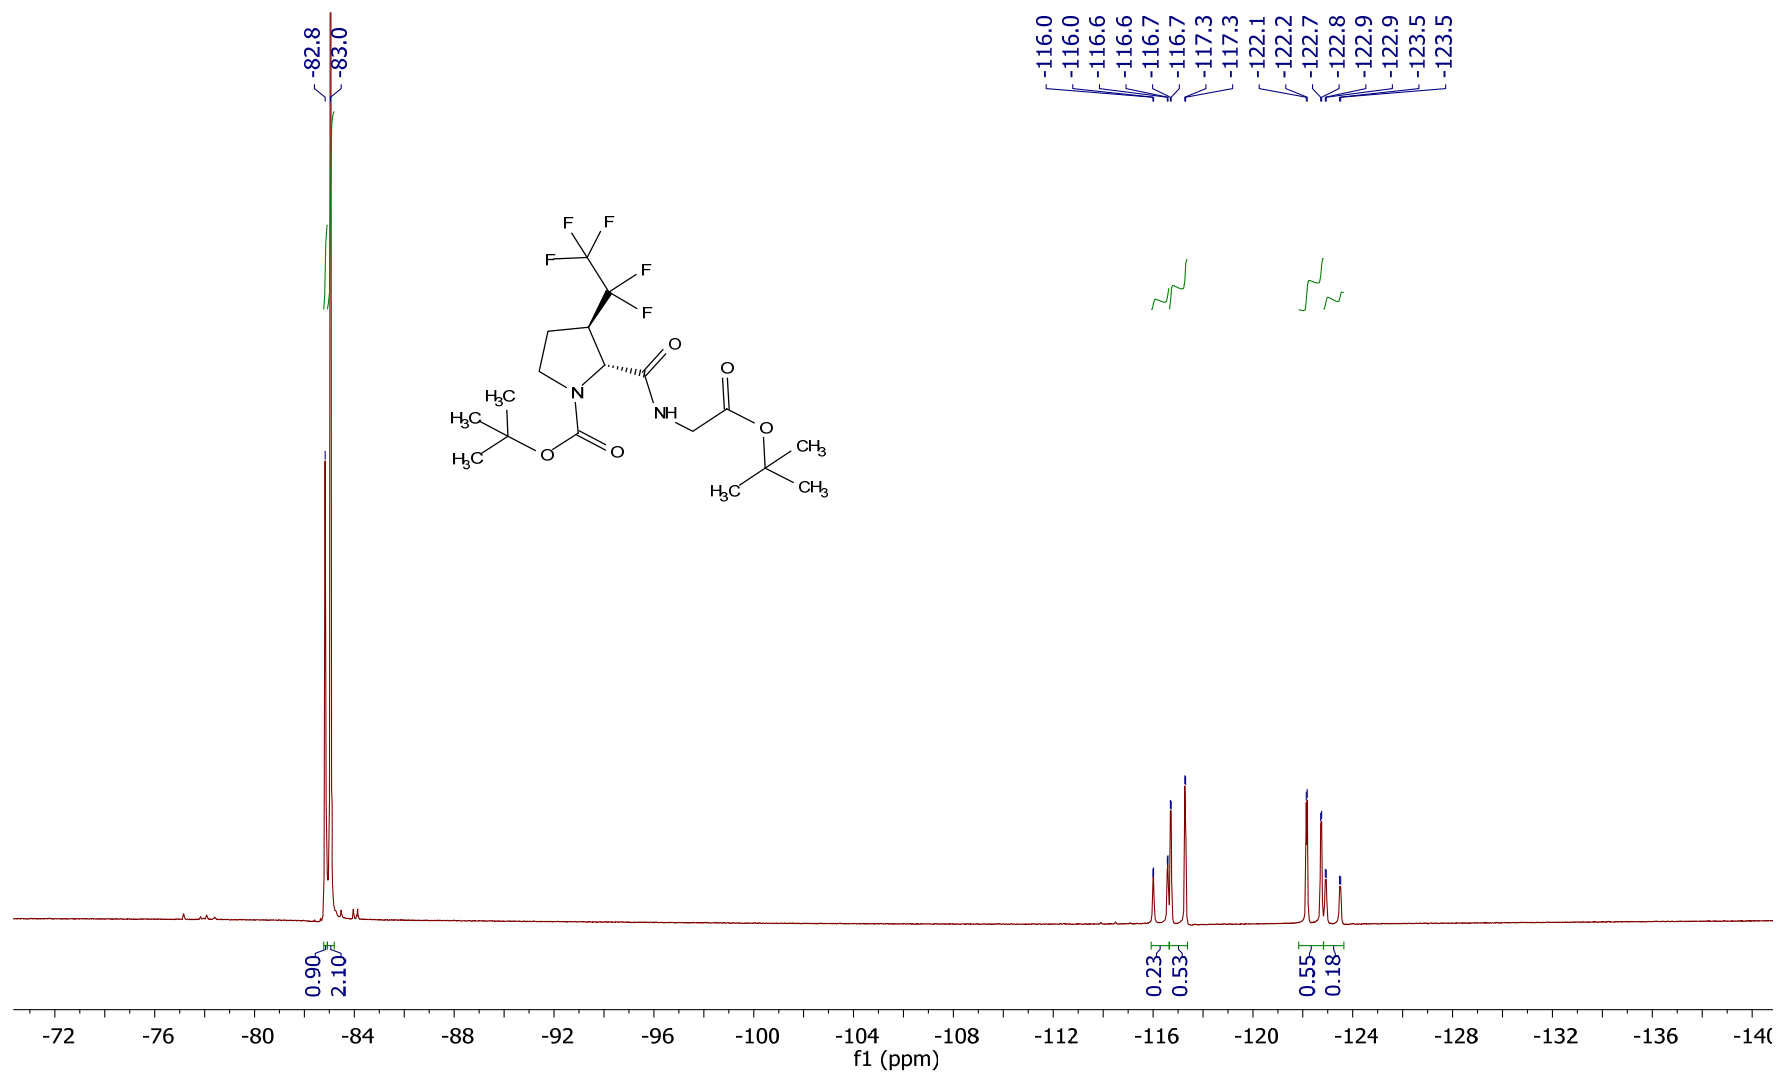

<sup>1</sup>H NMR spectrum of the compound (2*S*,3*R*)-**6a** (in CDCl<sub>3</sub>).

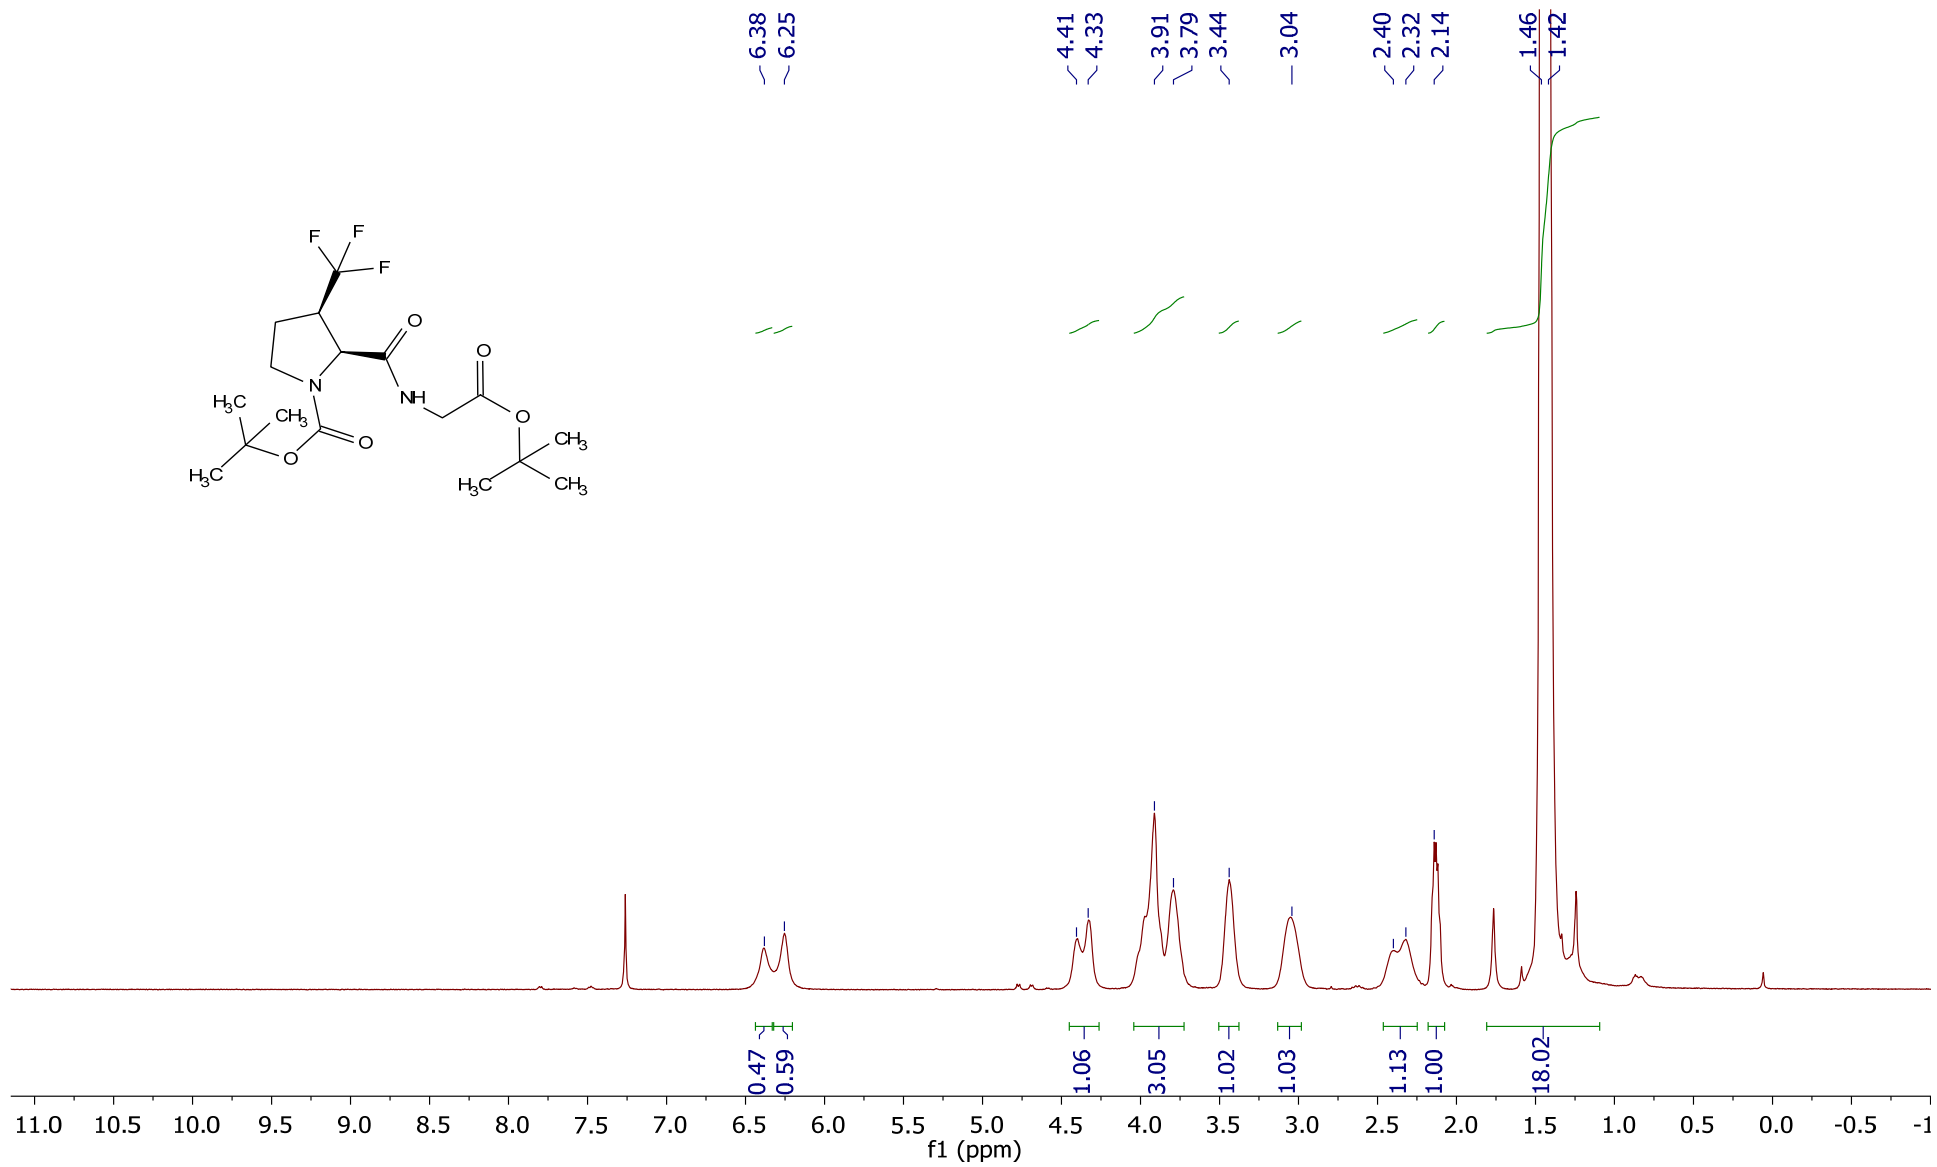



$^{13}\text{C}$  NMR spectrum of the compound (2*S*,3*R*)-**6a** (in  $\text{CDCl}_3$ ).

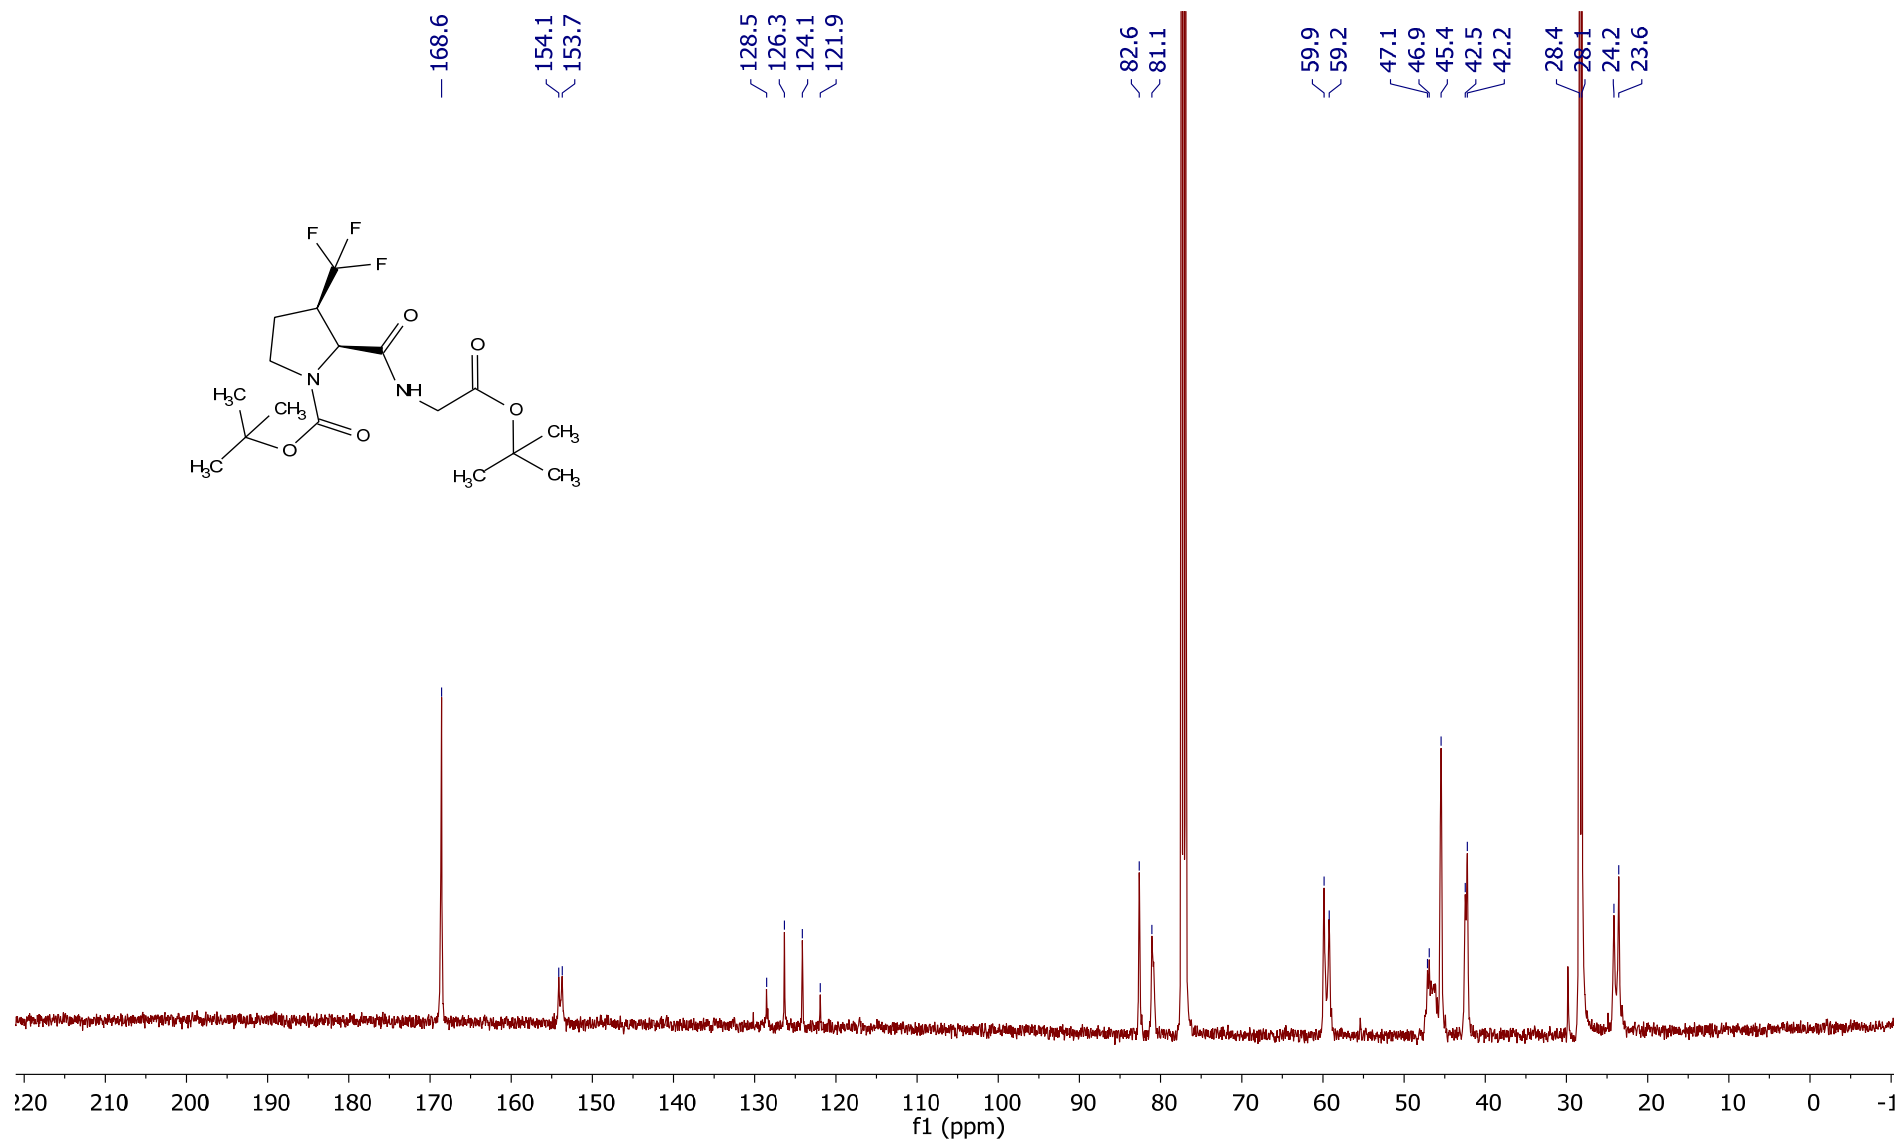

$^{19}\text{F}$  NMR spectrum of the compound (2*S*,3*R*)-**6a** (in  $\text{CDCl}_3$ ).

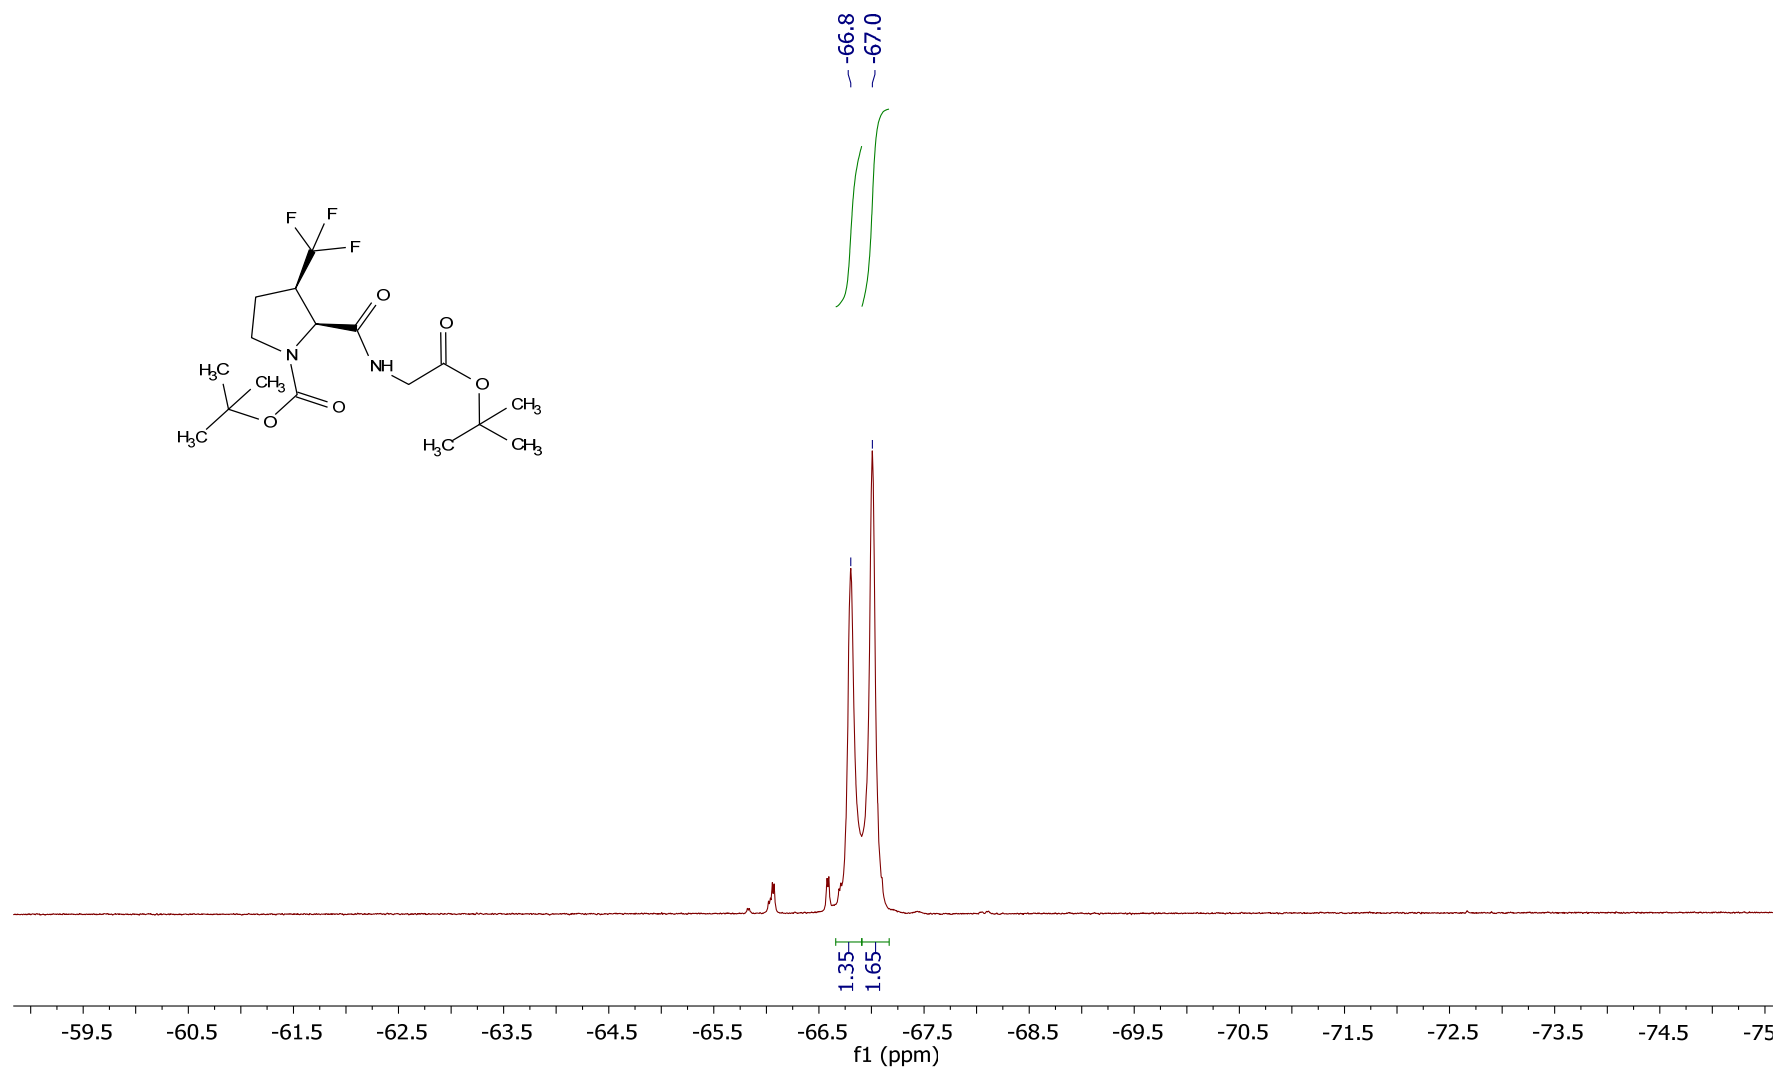

<sup>1</sup>H NMR spectrum of the compound (2*R*,3*S*)-**6a** (in CDCl<sub>3</sub>).

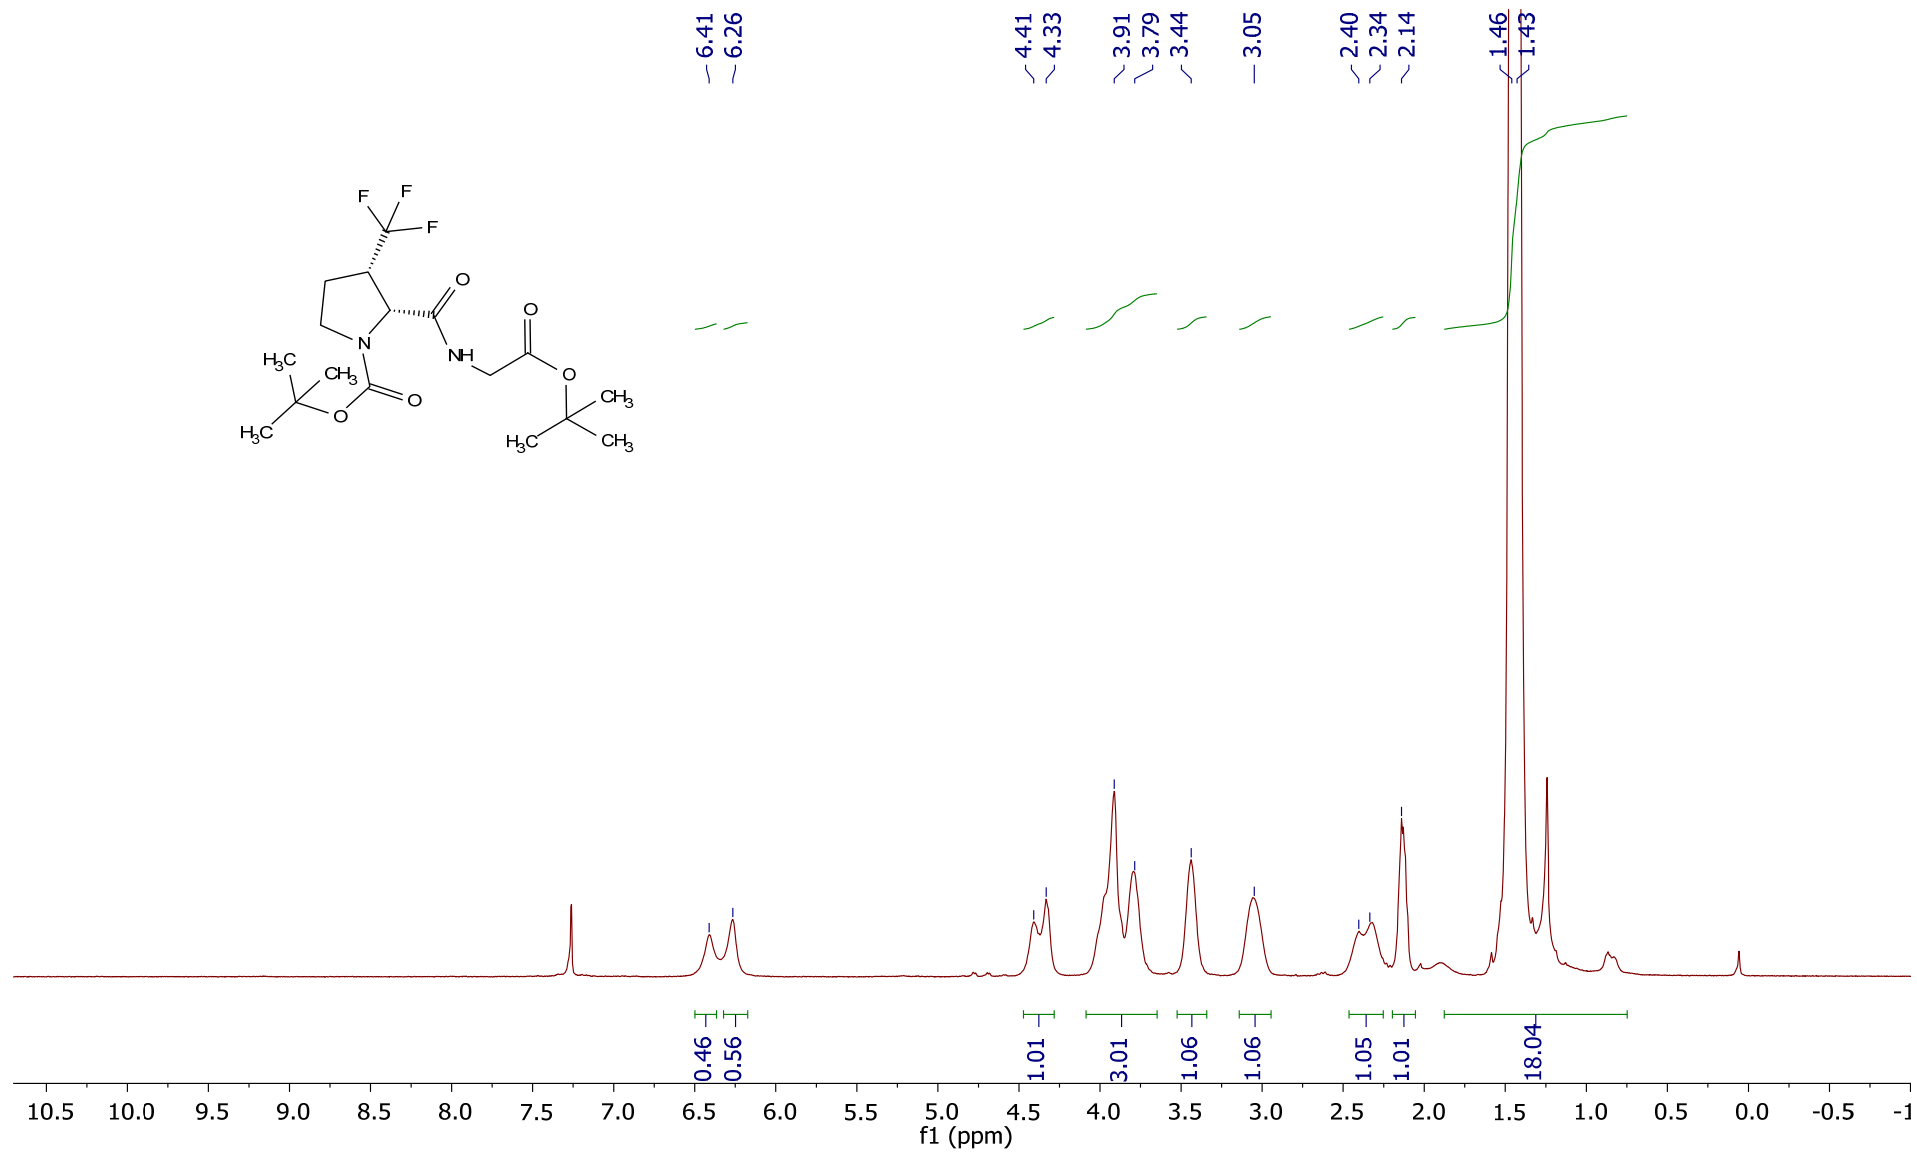

$^{13}\text{C}$  NMR spectrum of the compound (2*R*,3*S*)-**6a** (in  $\text{CDCl}_3$ ).

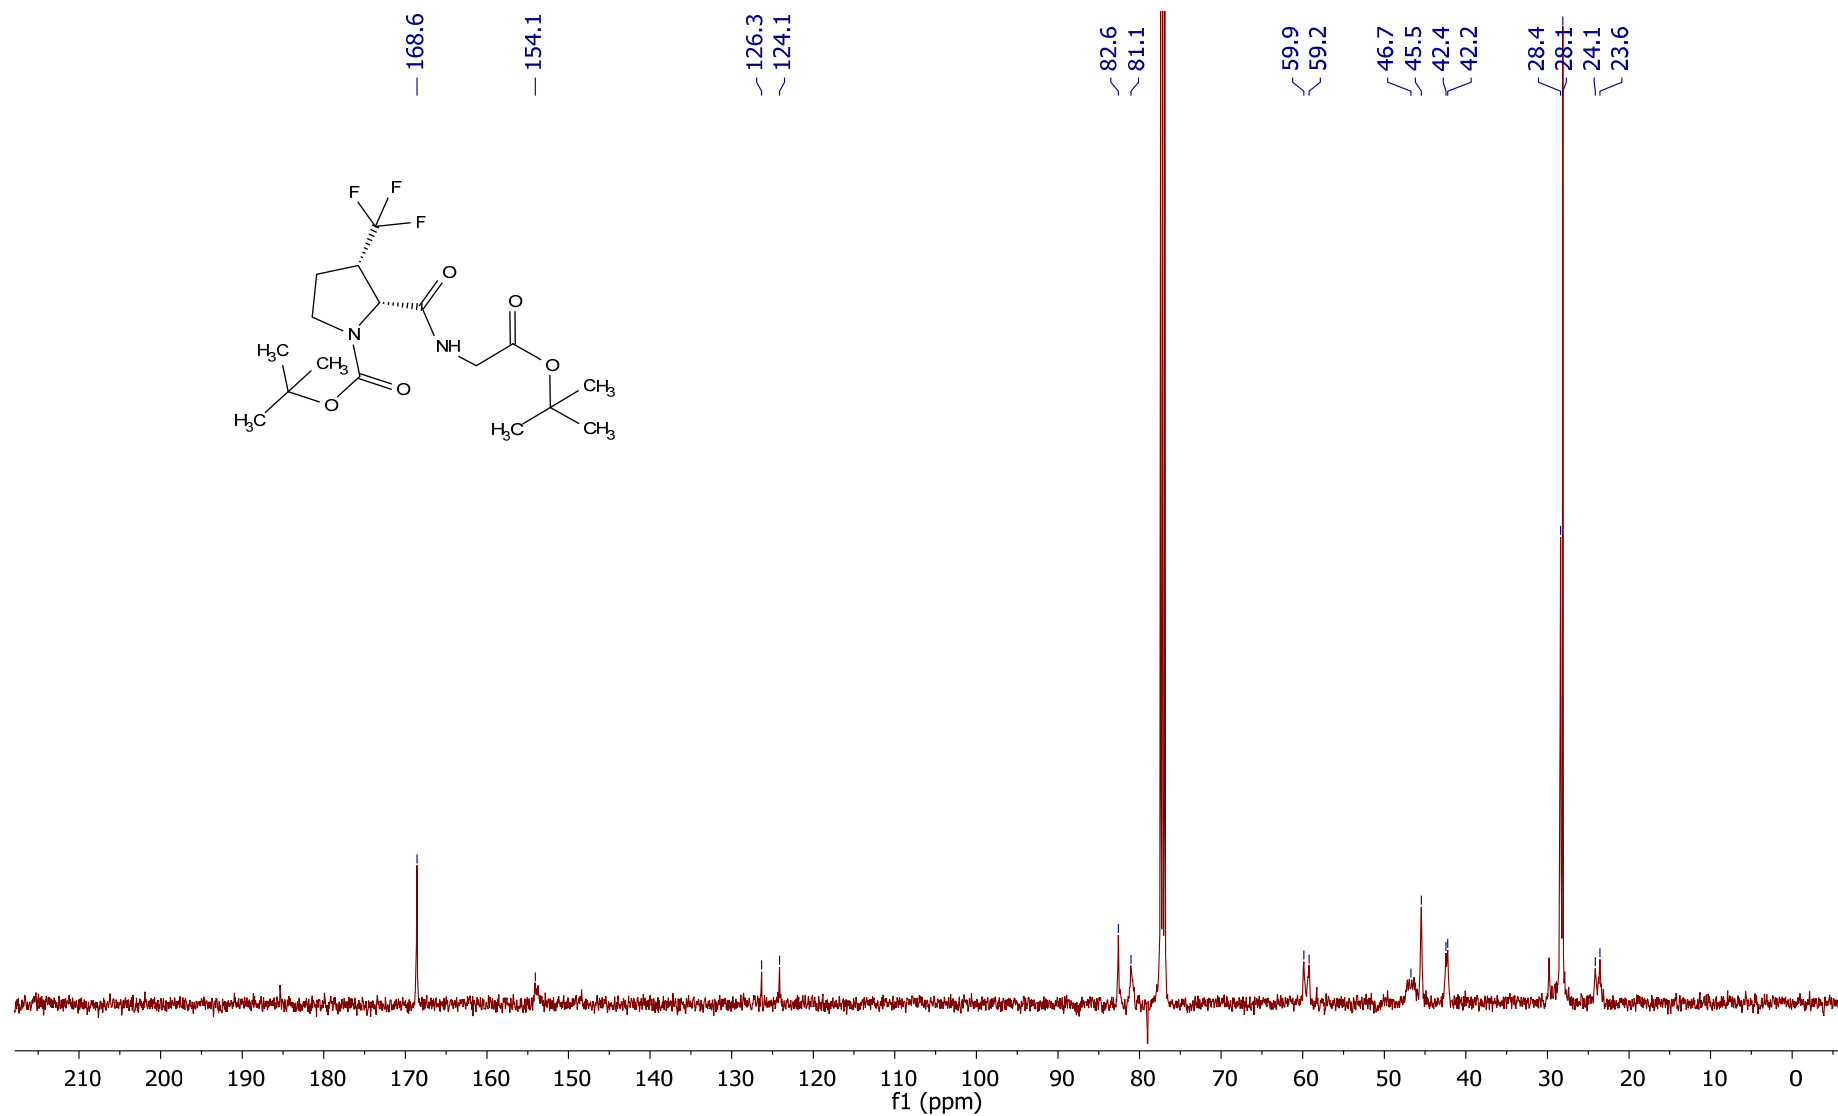

$^{19}\text{F}$  NMR spectrum of the compound (2*R*,3*S*)-**6a** (in  $\text{CDCl}_3$ ).

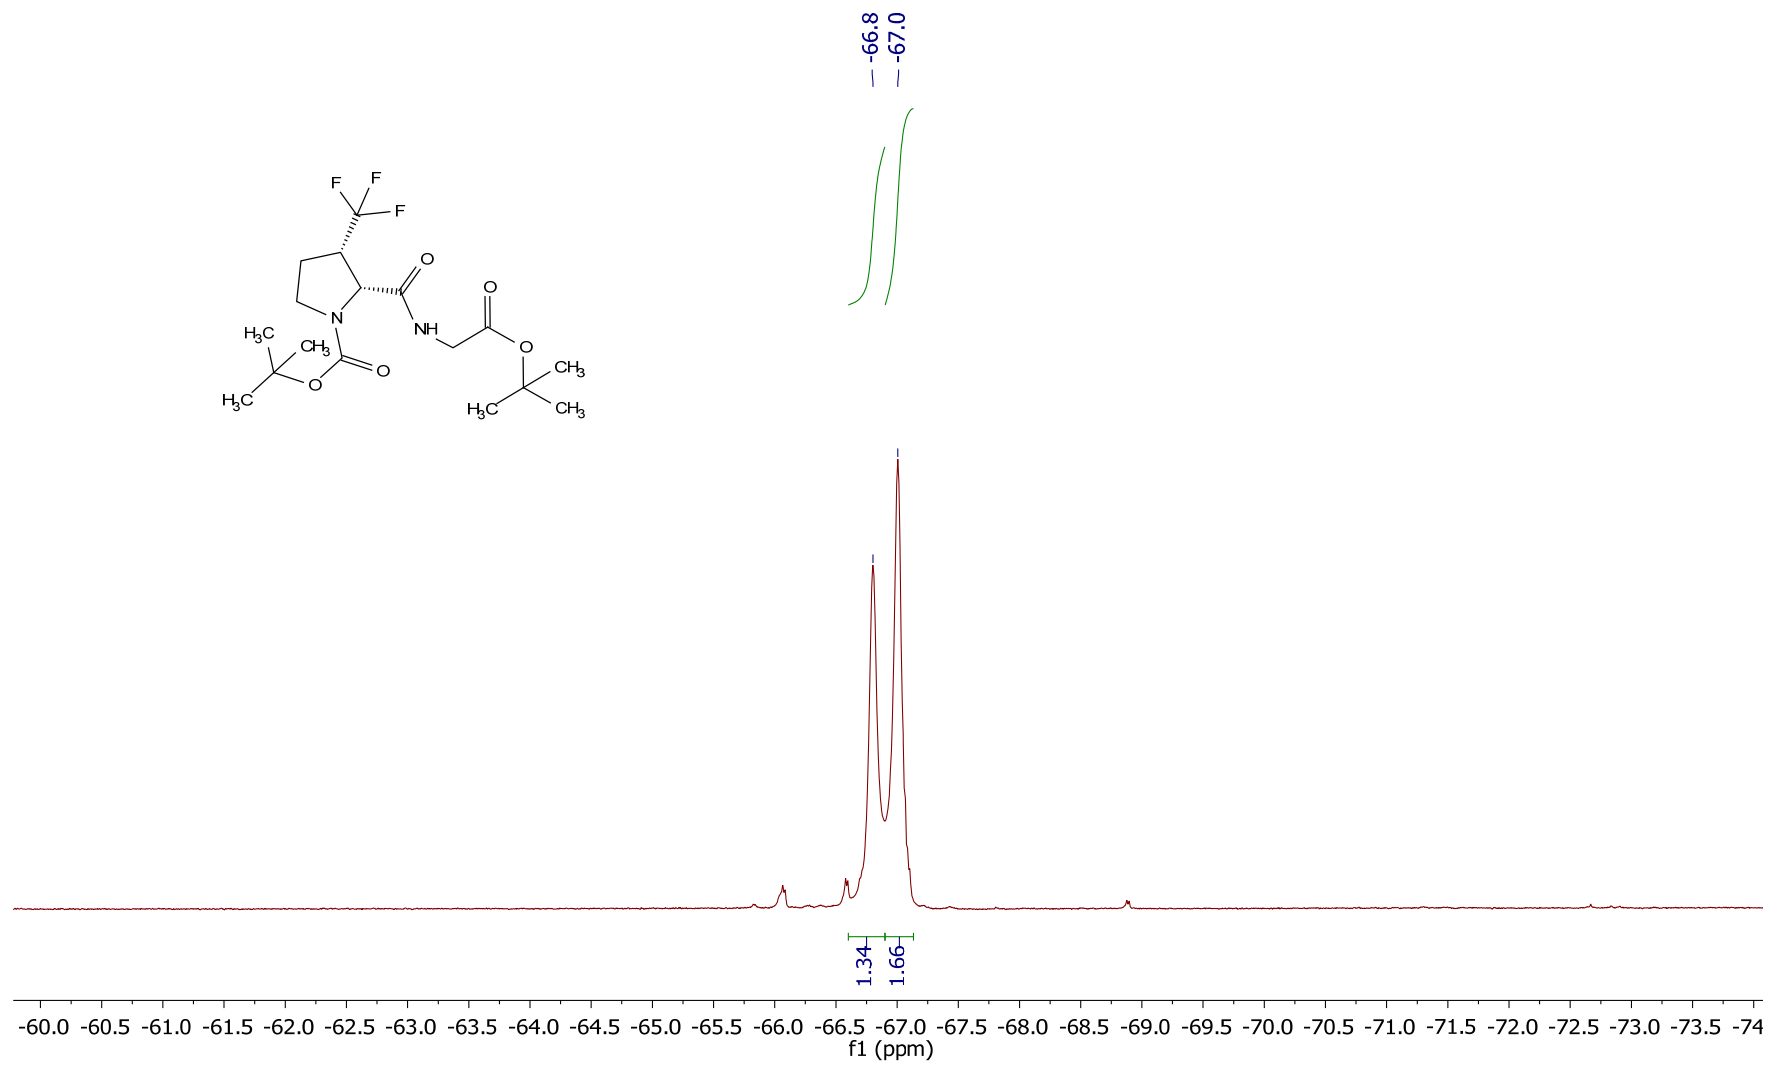

$^1\text{H}$  NMR spectrum of the compound (2*S*,3*R*)-**6b** (in  $\text{CDCl}_3$ ).

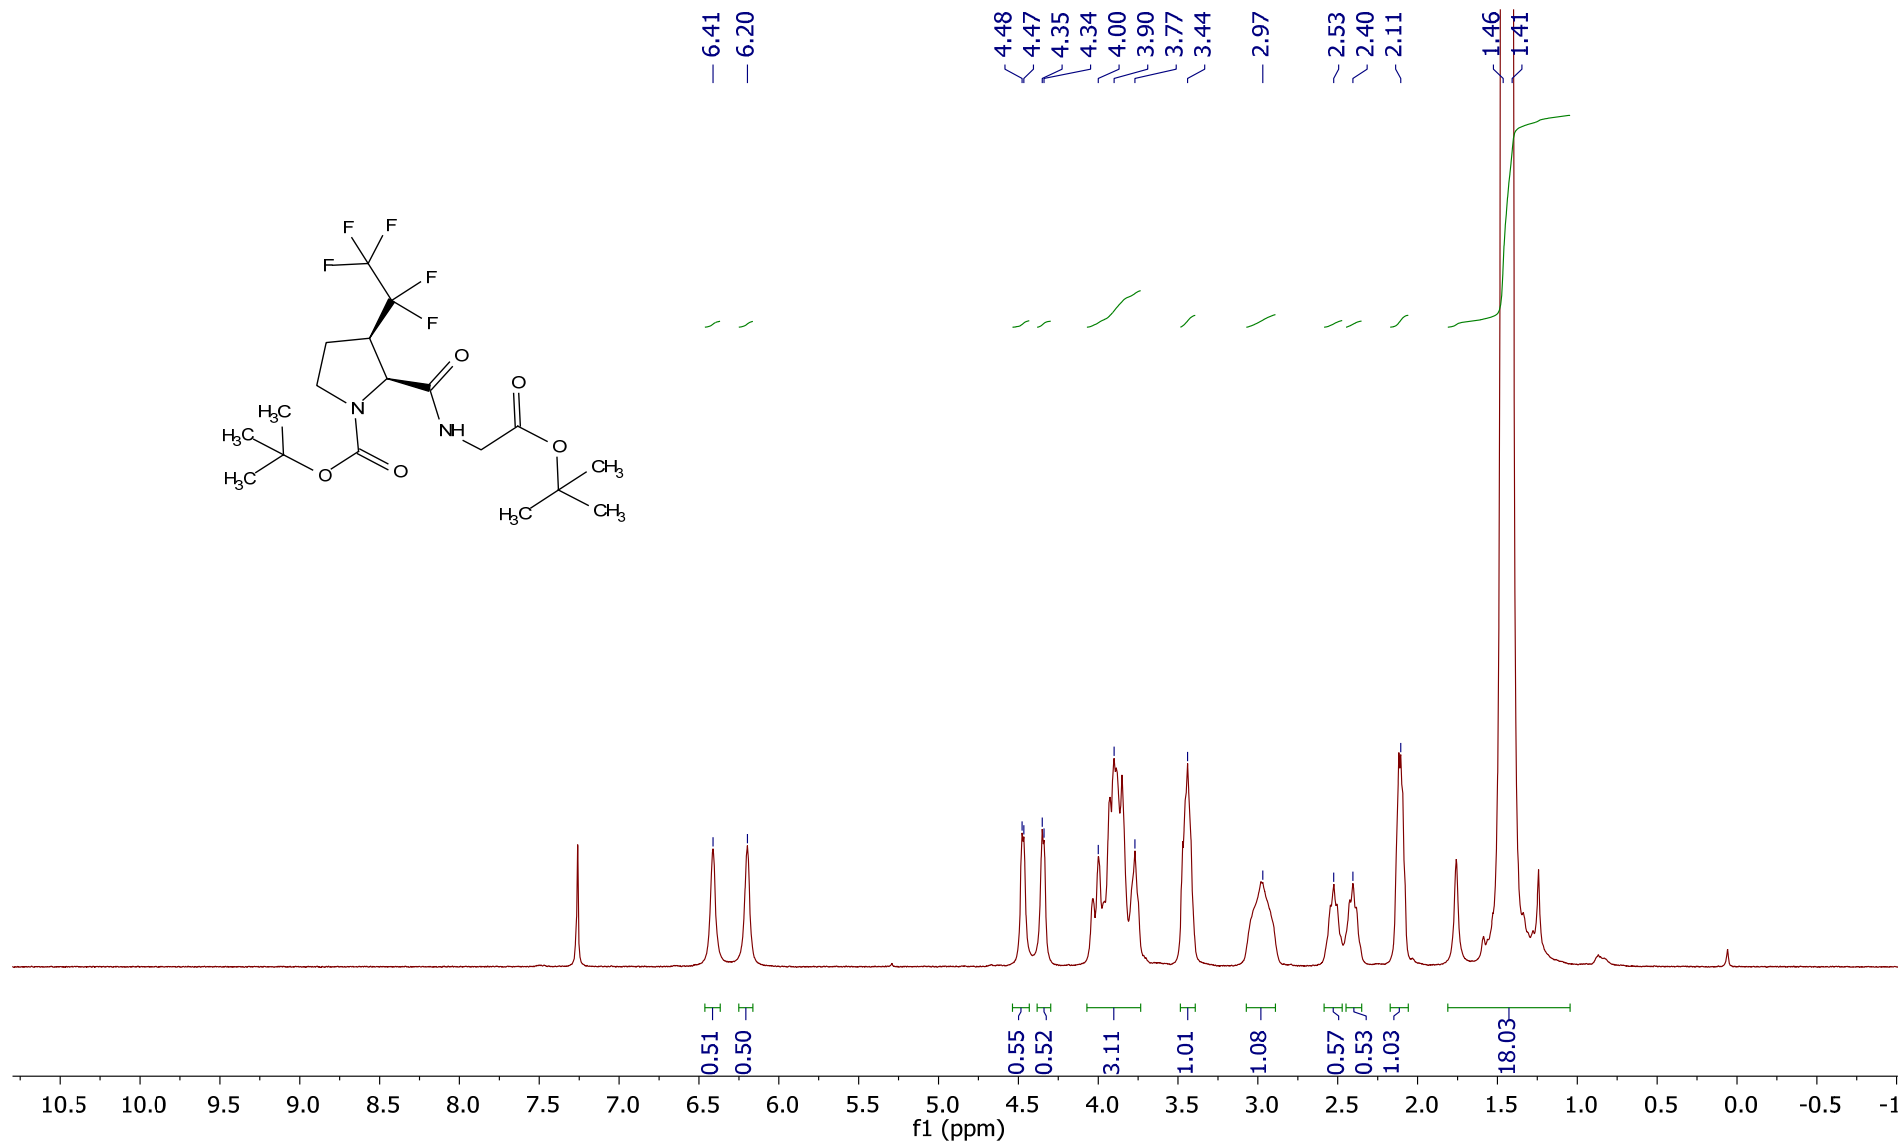

$^{13}\text{C}$  NMR spectrum of the compound (2*S*,3*R*)-**6b** (in  $\text{CDCl}_3$ ).

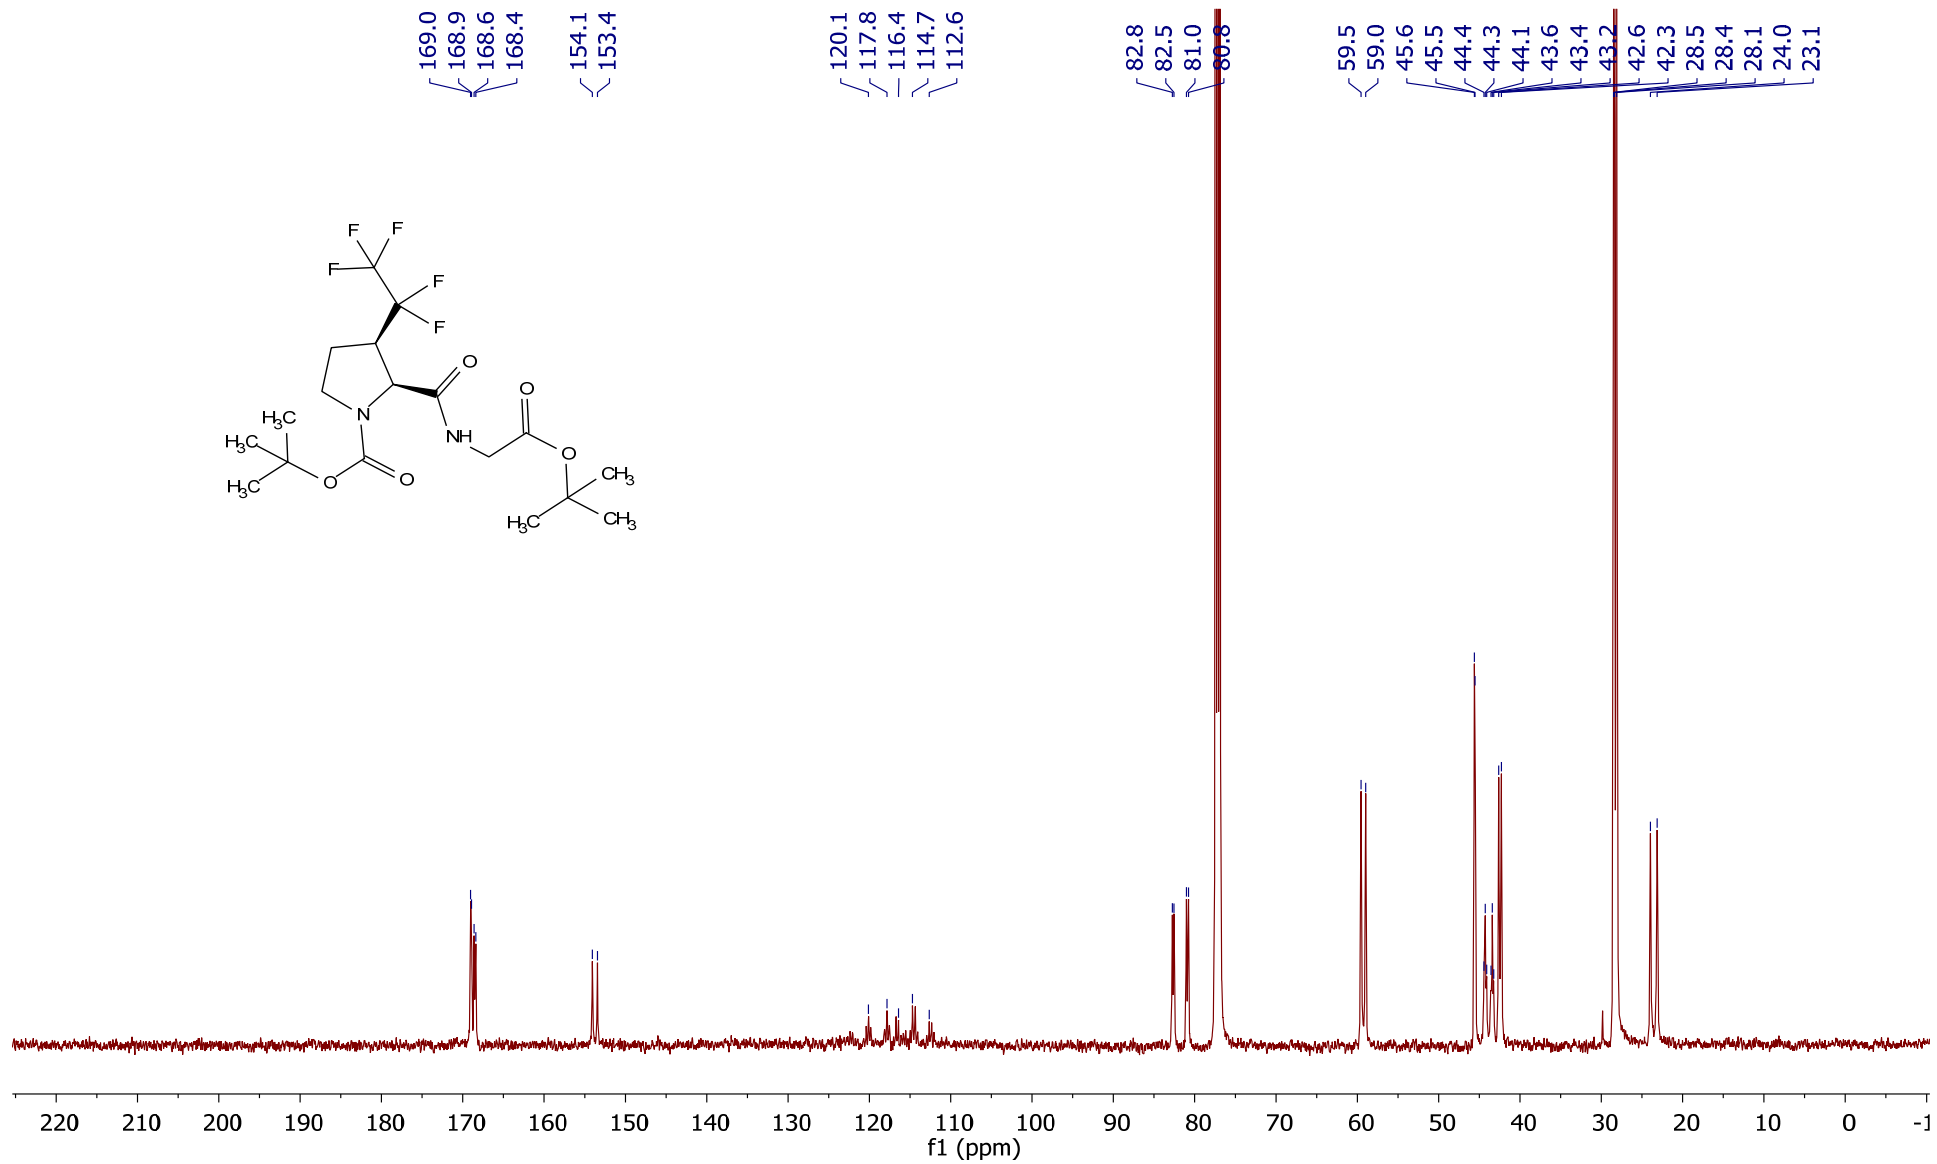



$^{19}\text{F}$  NMR spectrum of the compound (2*S*,3*R*)-**6b** (in  $\text{CDCl}_3$ ).

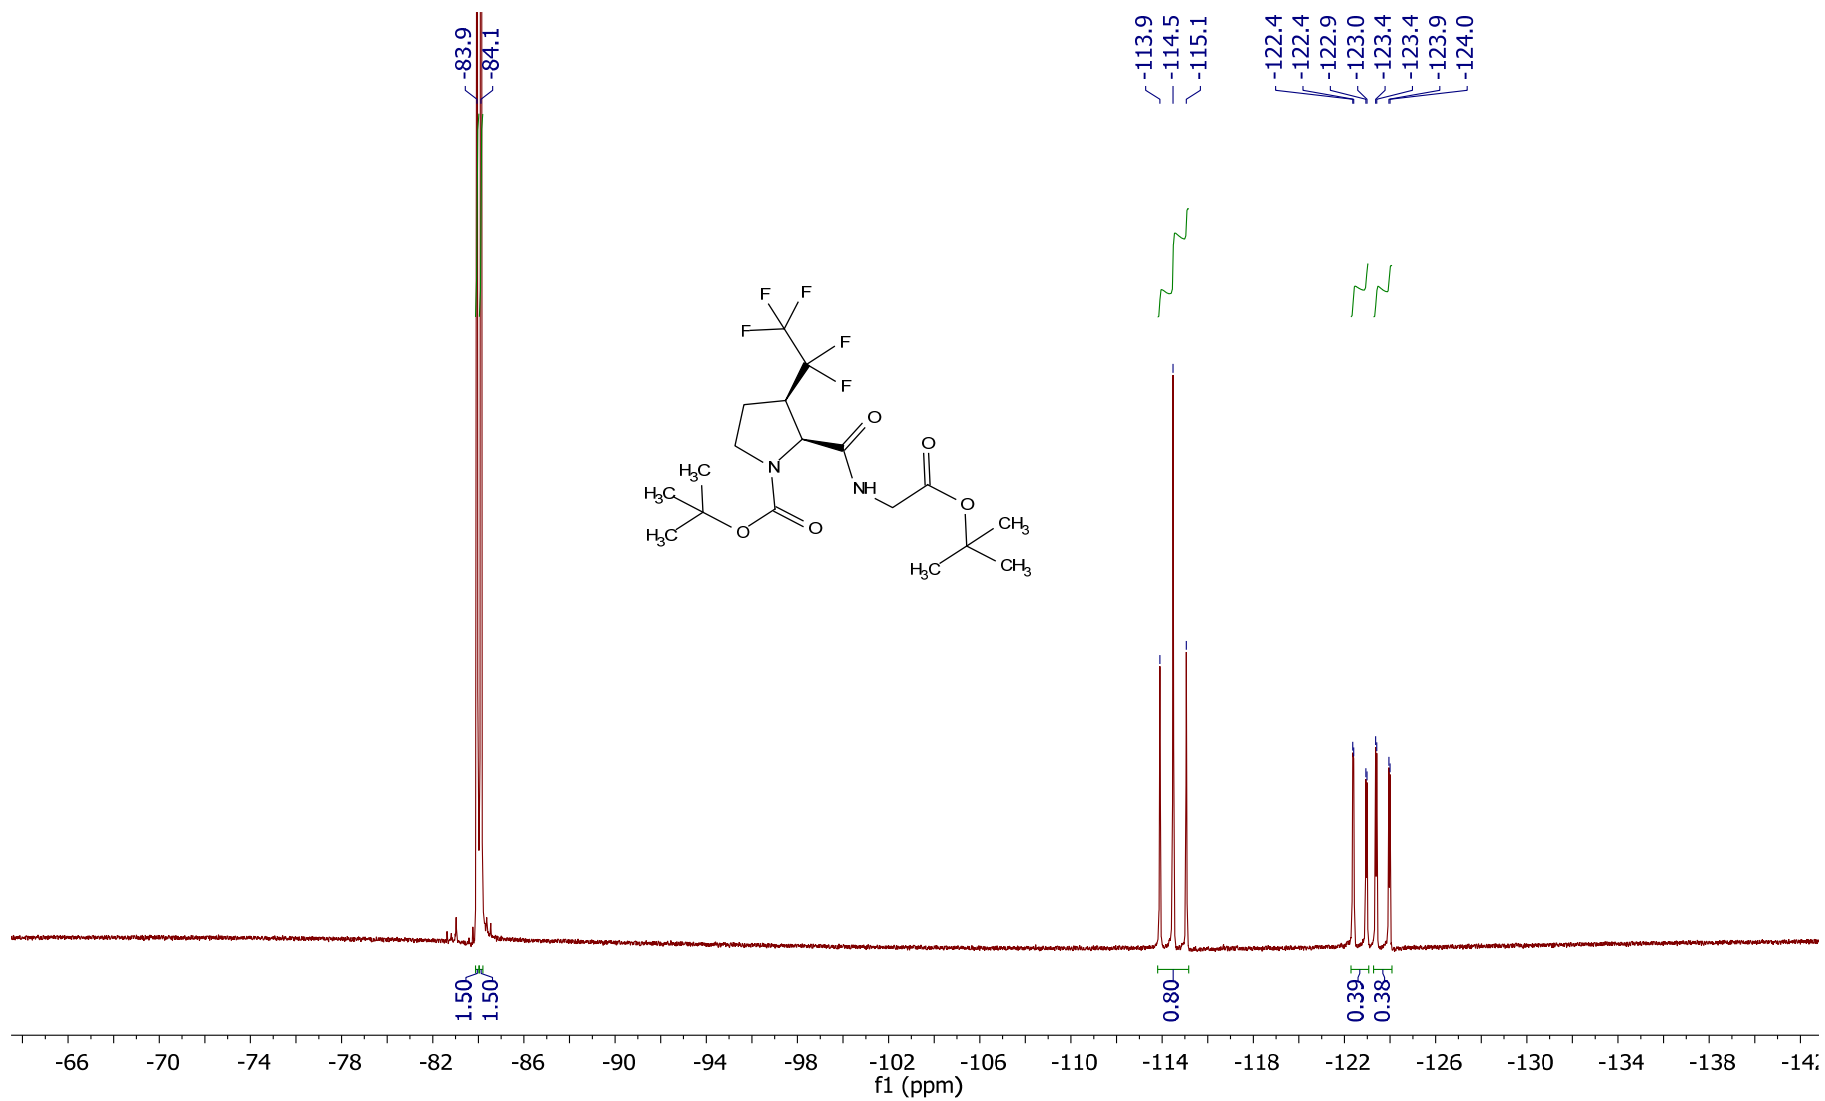

<sup>1</sup>H NMR spectrum of the compound (2*R*,3*S*)-**6b** (in CDCl<sub>3</sub>).

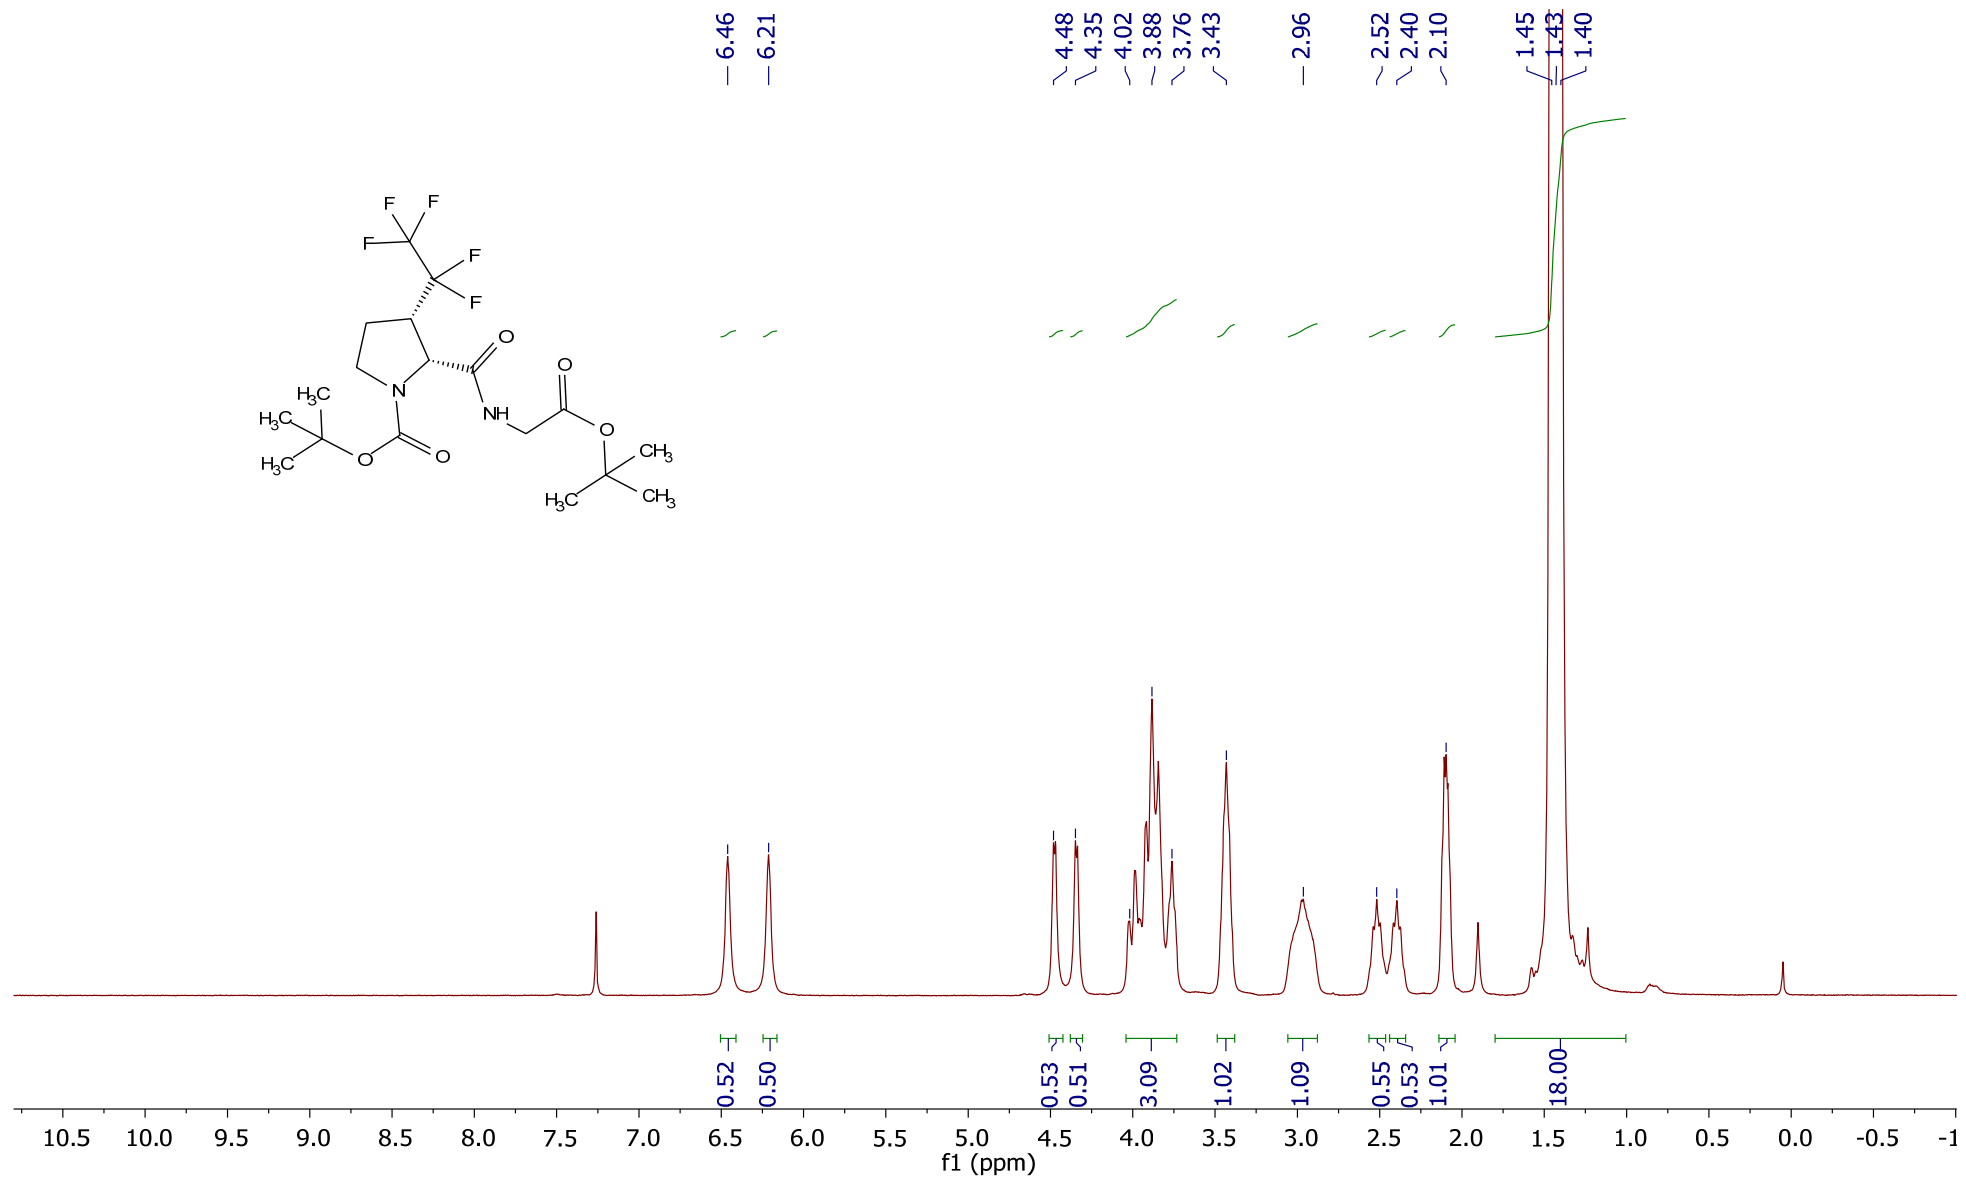

$^{13}\text{C}$  NMR spectrum of the compound (2*R*,3*S*)-**6b** (in  $\text{CDCl}_3$ ).

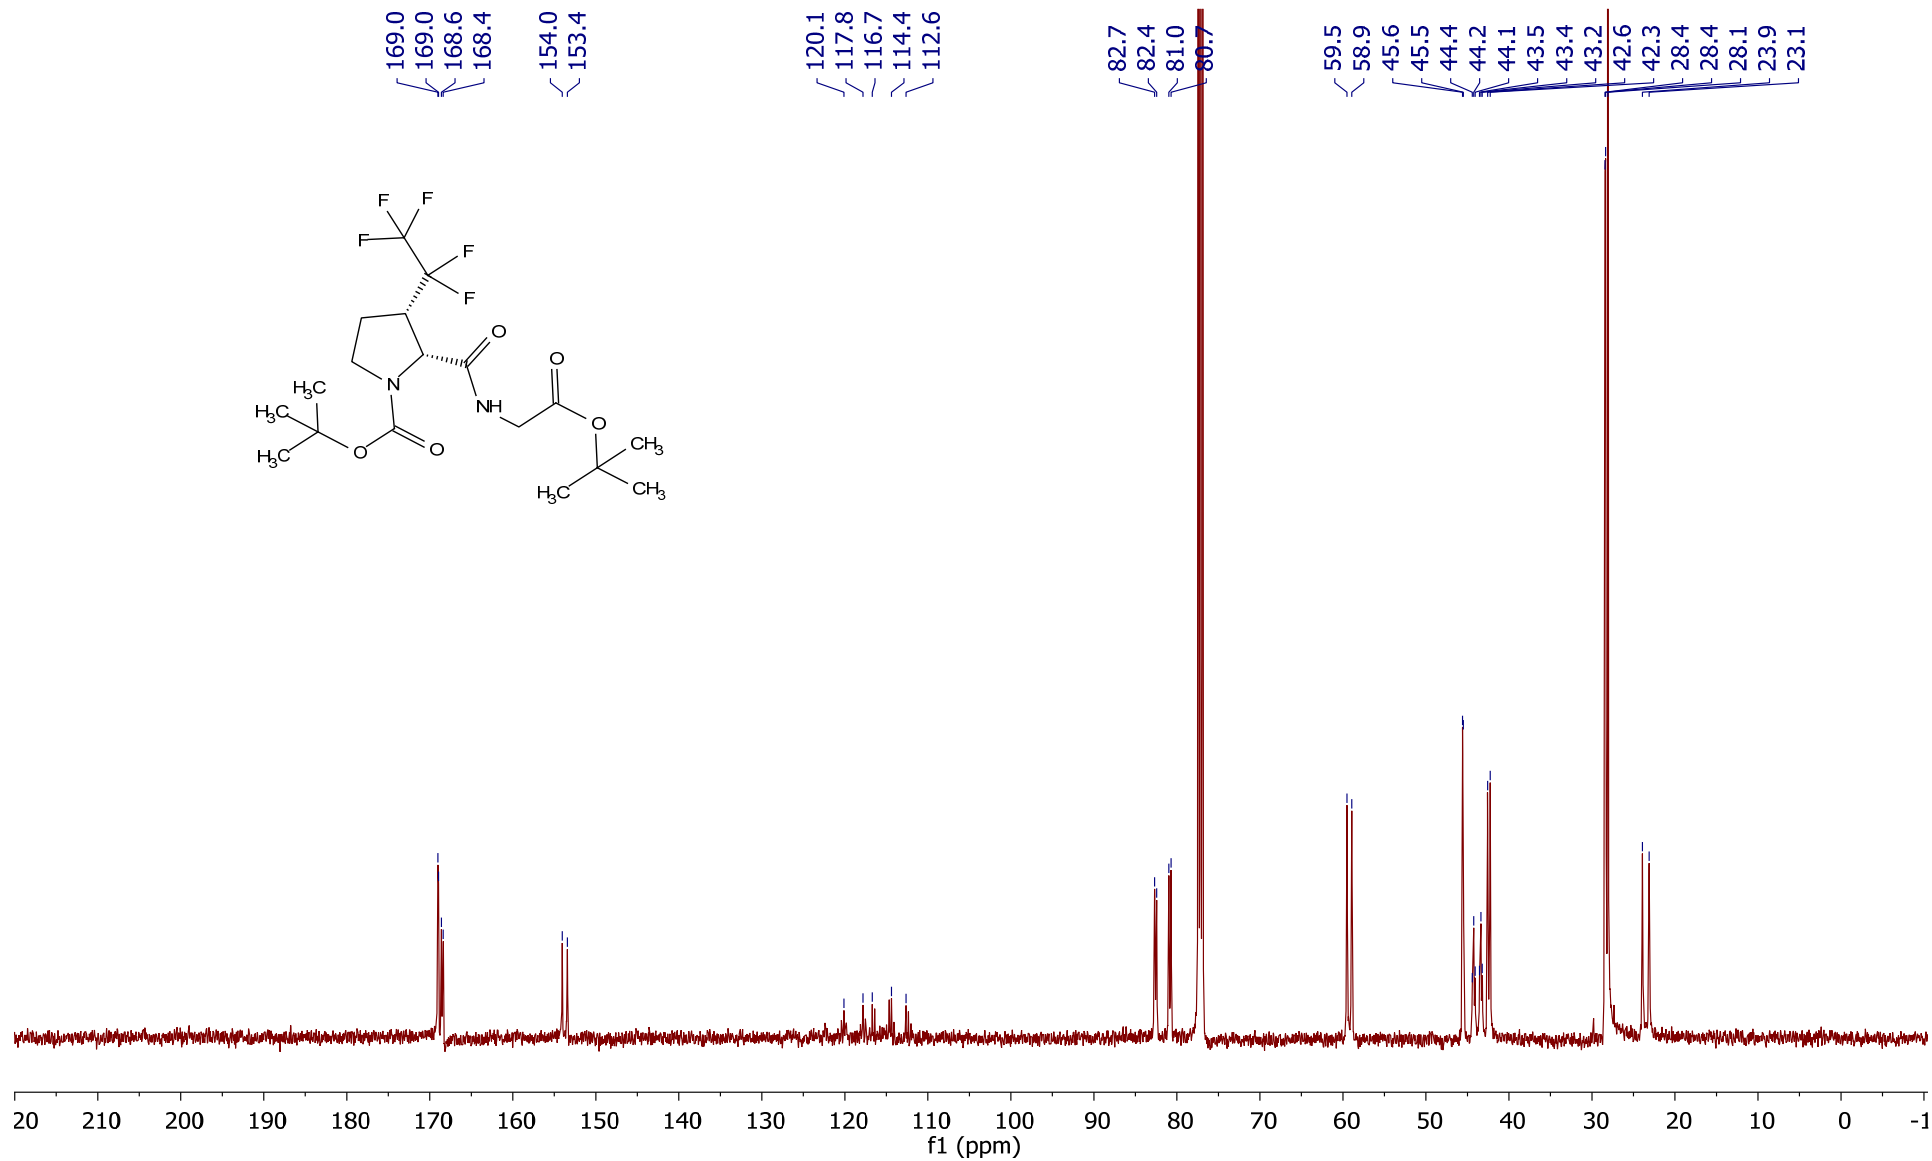

$^{19}\text{F}$  NMR spectrum of the compound (2*R*,3*S*)-**6b** (in  $\text{CDCl}_3$ ).

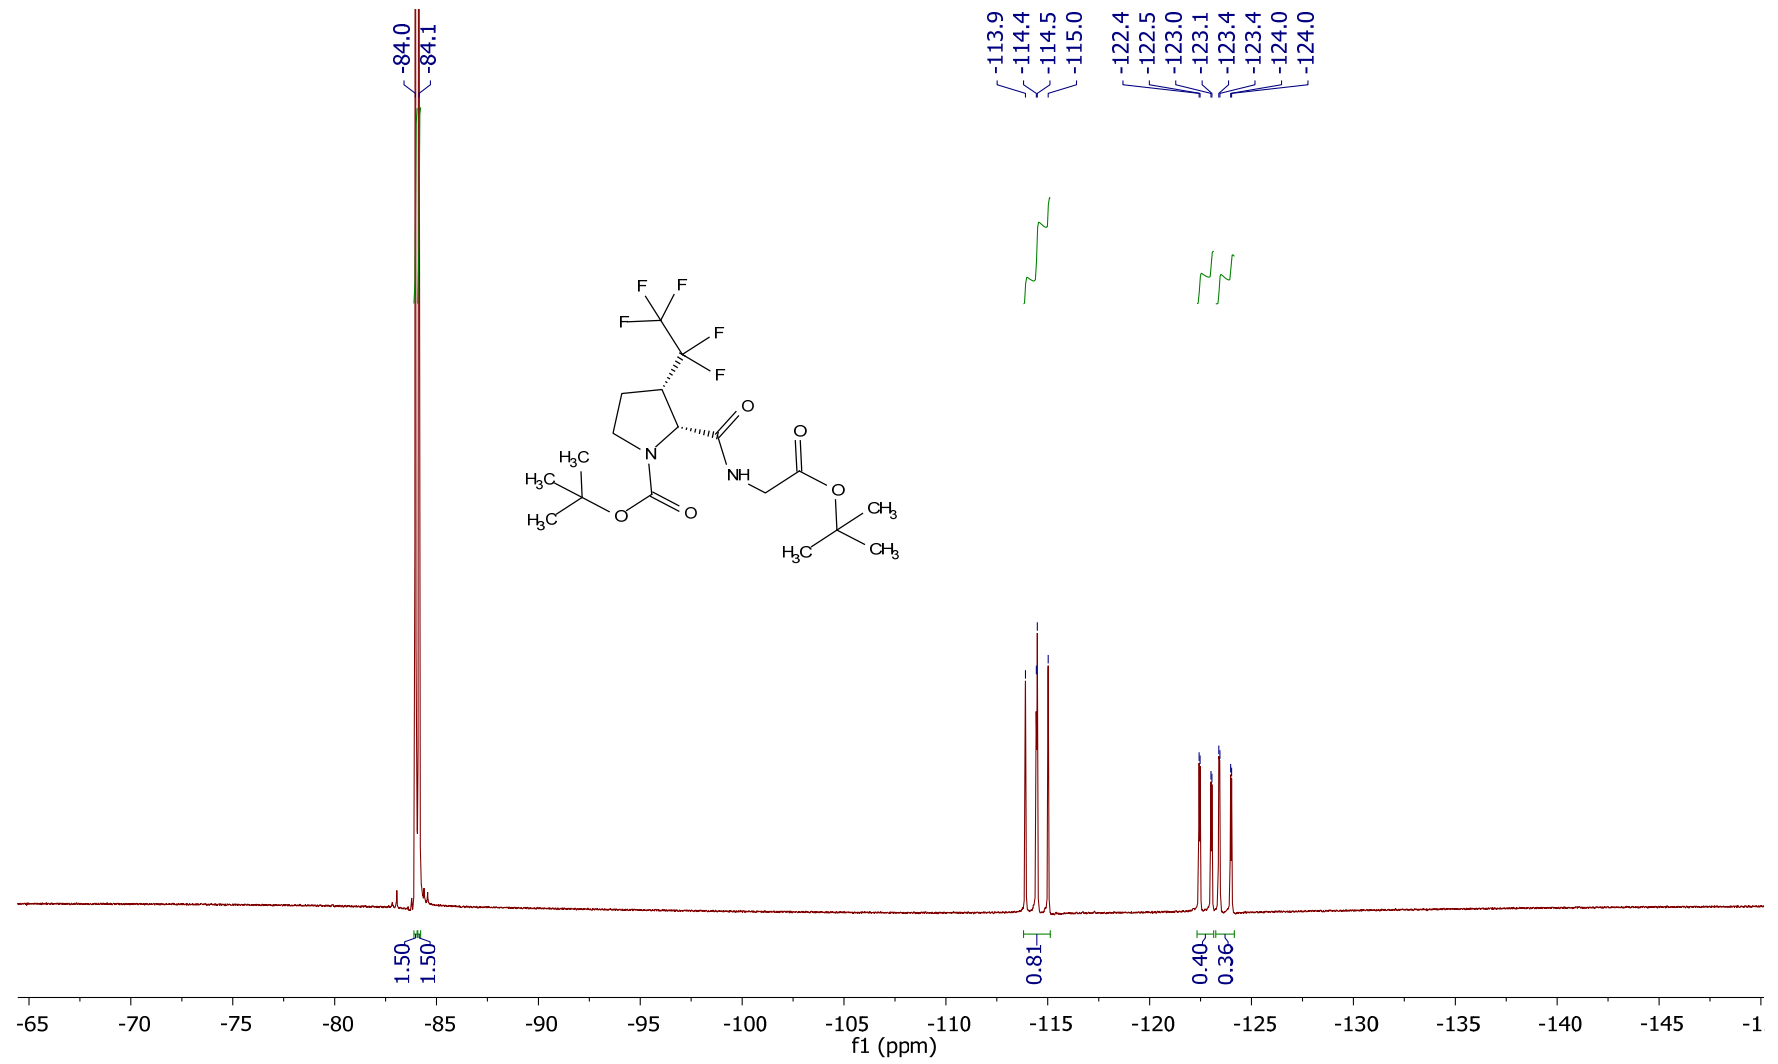

$^1\text{H}$  NMR spectrum of the compound (2*S*,3*S*)-**2a** (in  $\text{D}_2\text{O}$ ).

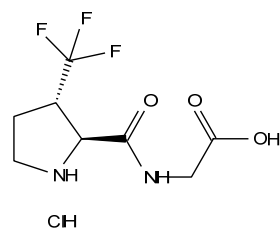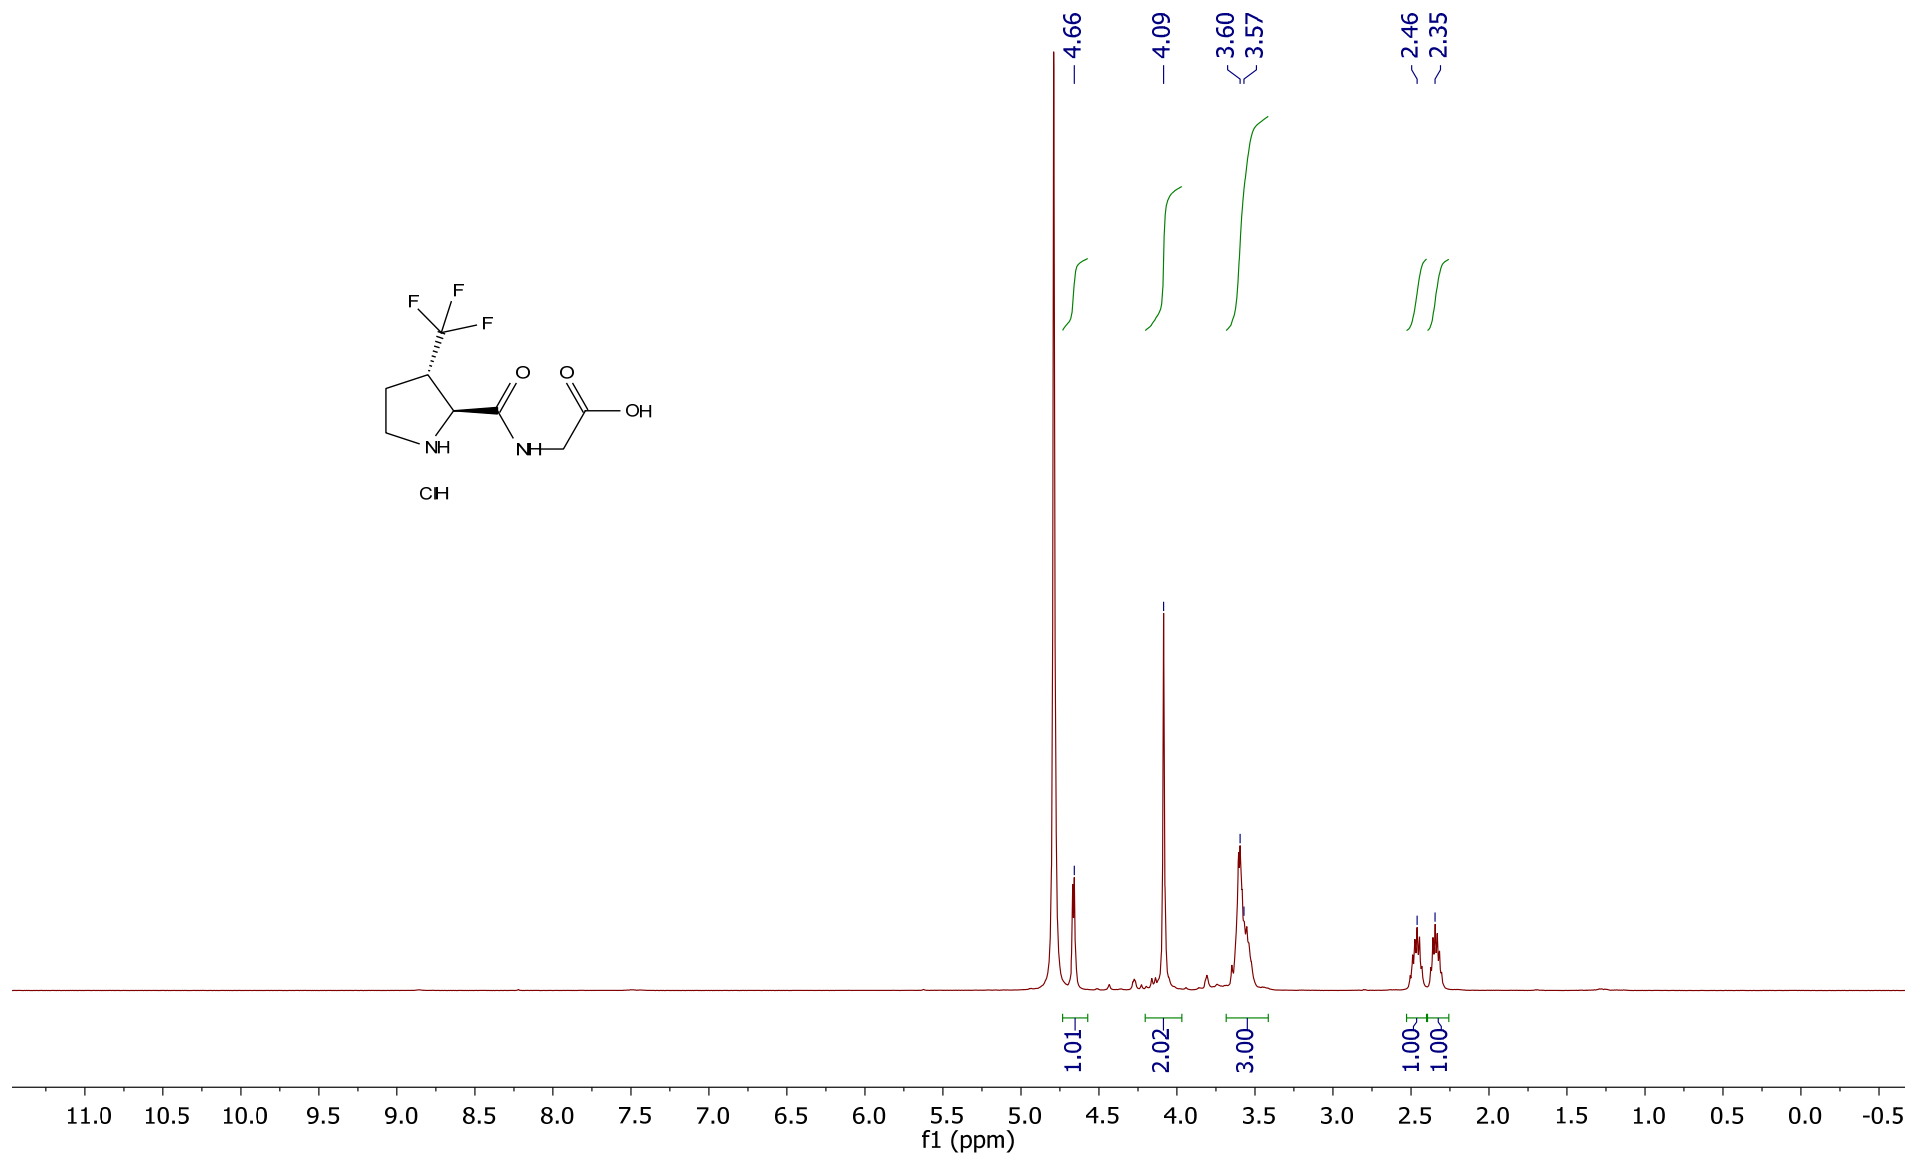

$^{13}\text{C}$  NMR spectrum of the compound (2*S*,3*S*)-**2a** (in  $\text{D}_2\text{O}$ ).

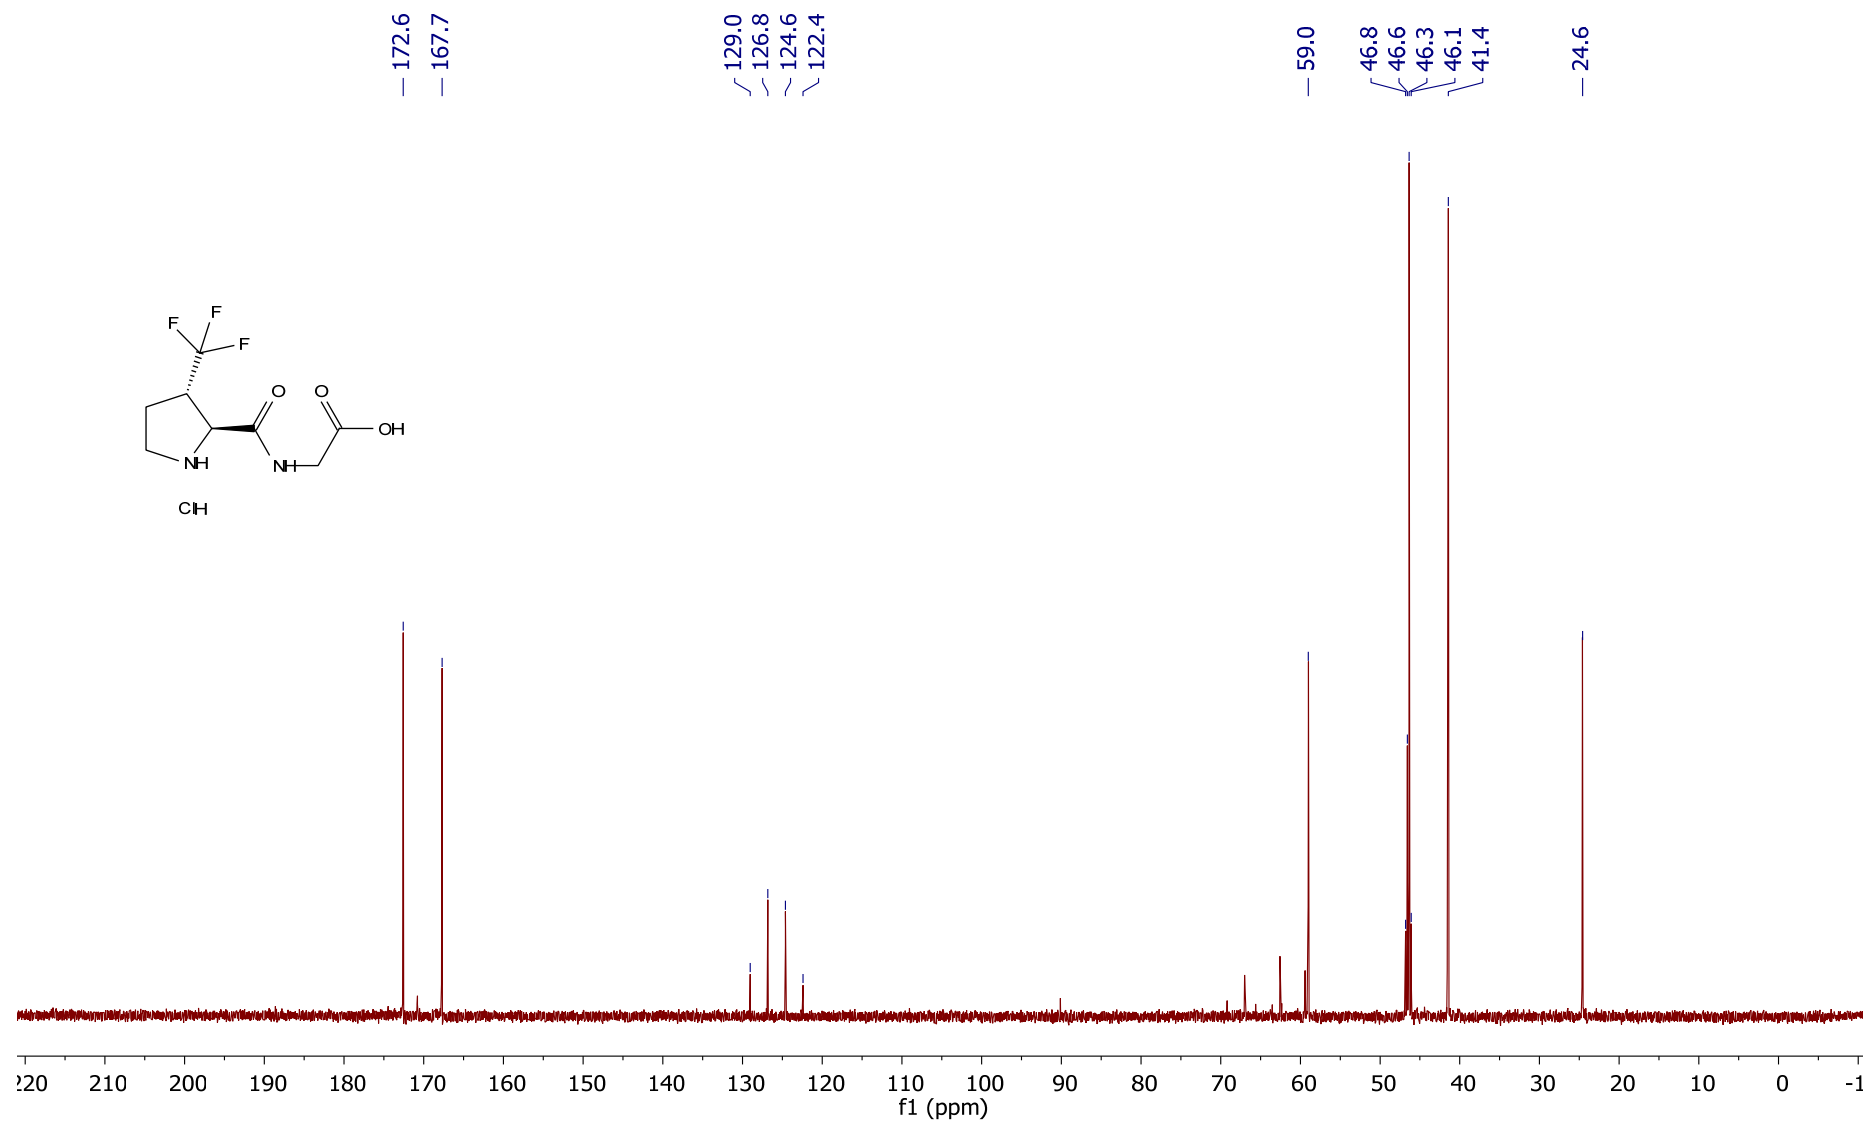

$^{19}\text{F}$  NMR spectrum of the compound (2*S*,3*S*)-**2a** (in  $\text{D}_2\text{O}$ ).

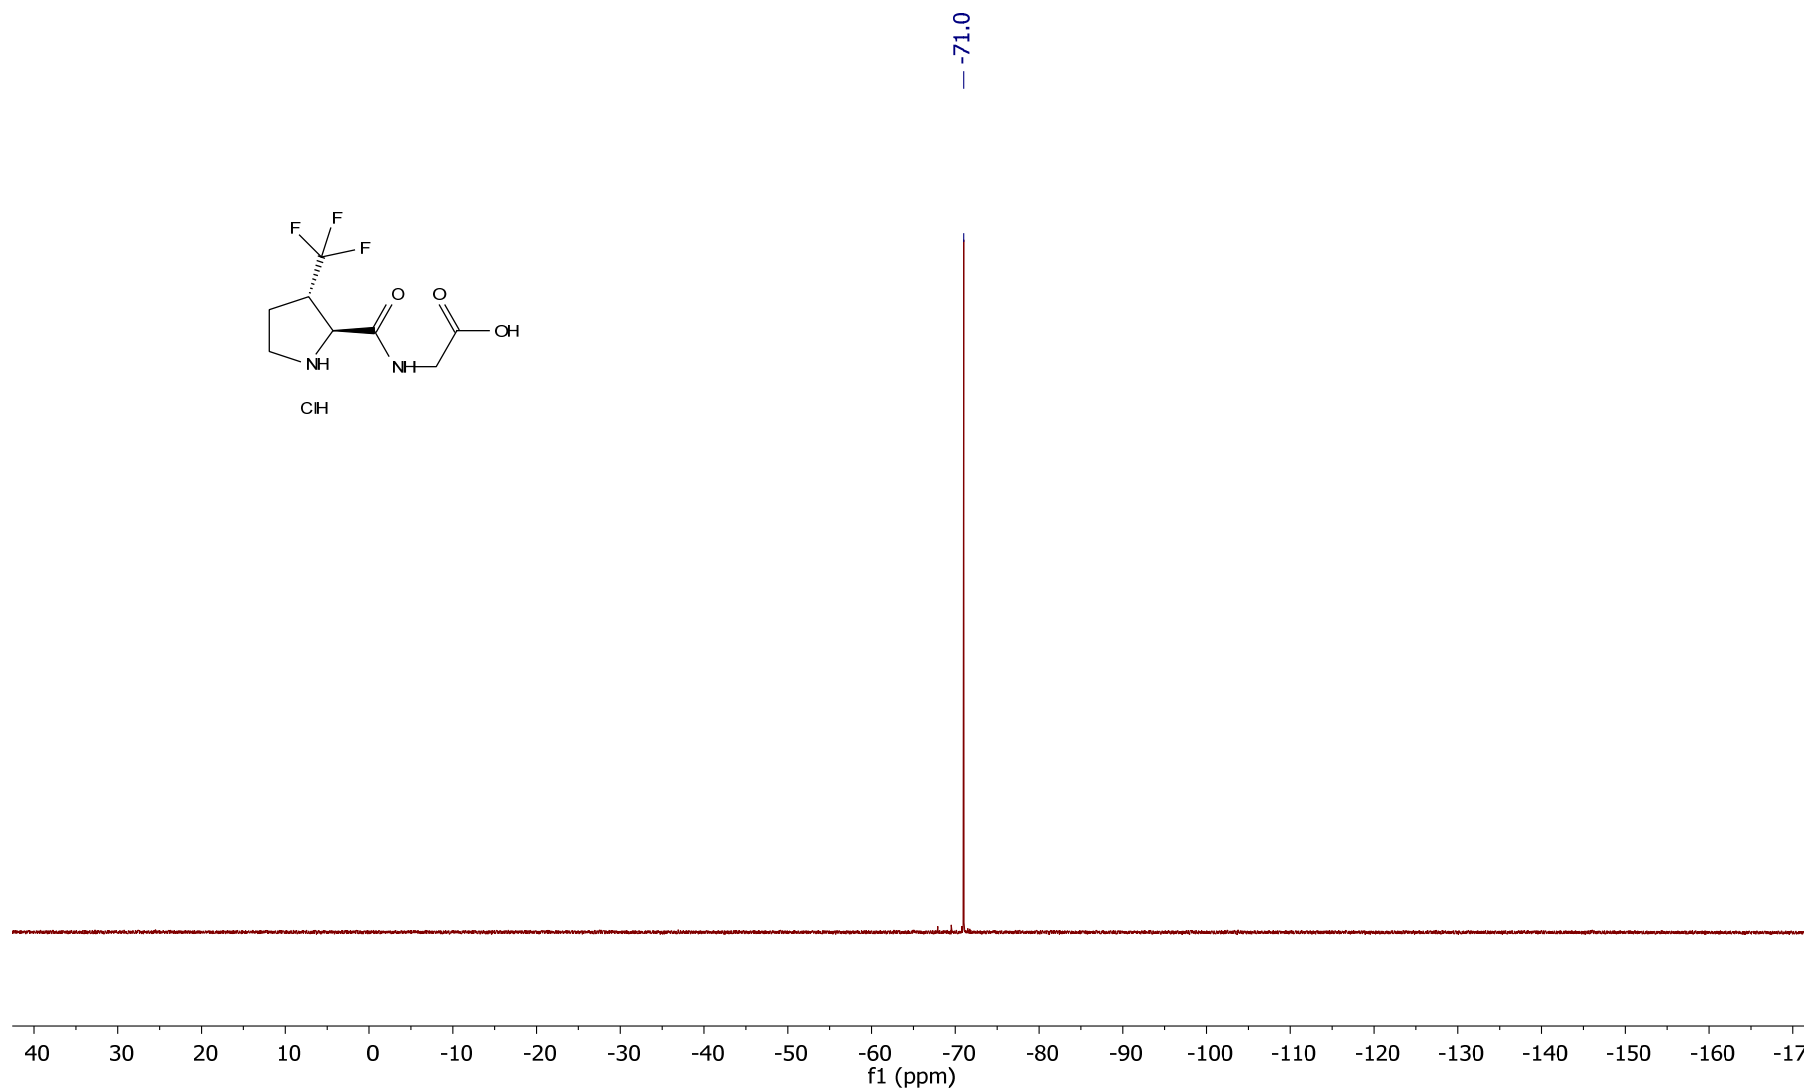



<sup>1</sup>H NMR spectrum of the compound (2*R*,3*R*)-**2a** (in D<sub>2</sub>O).

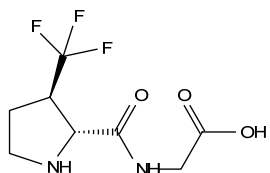

CH

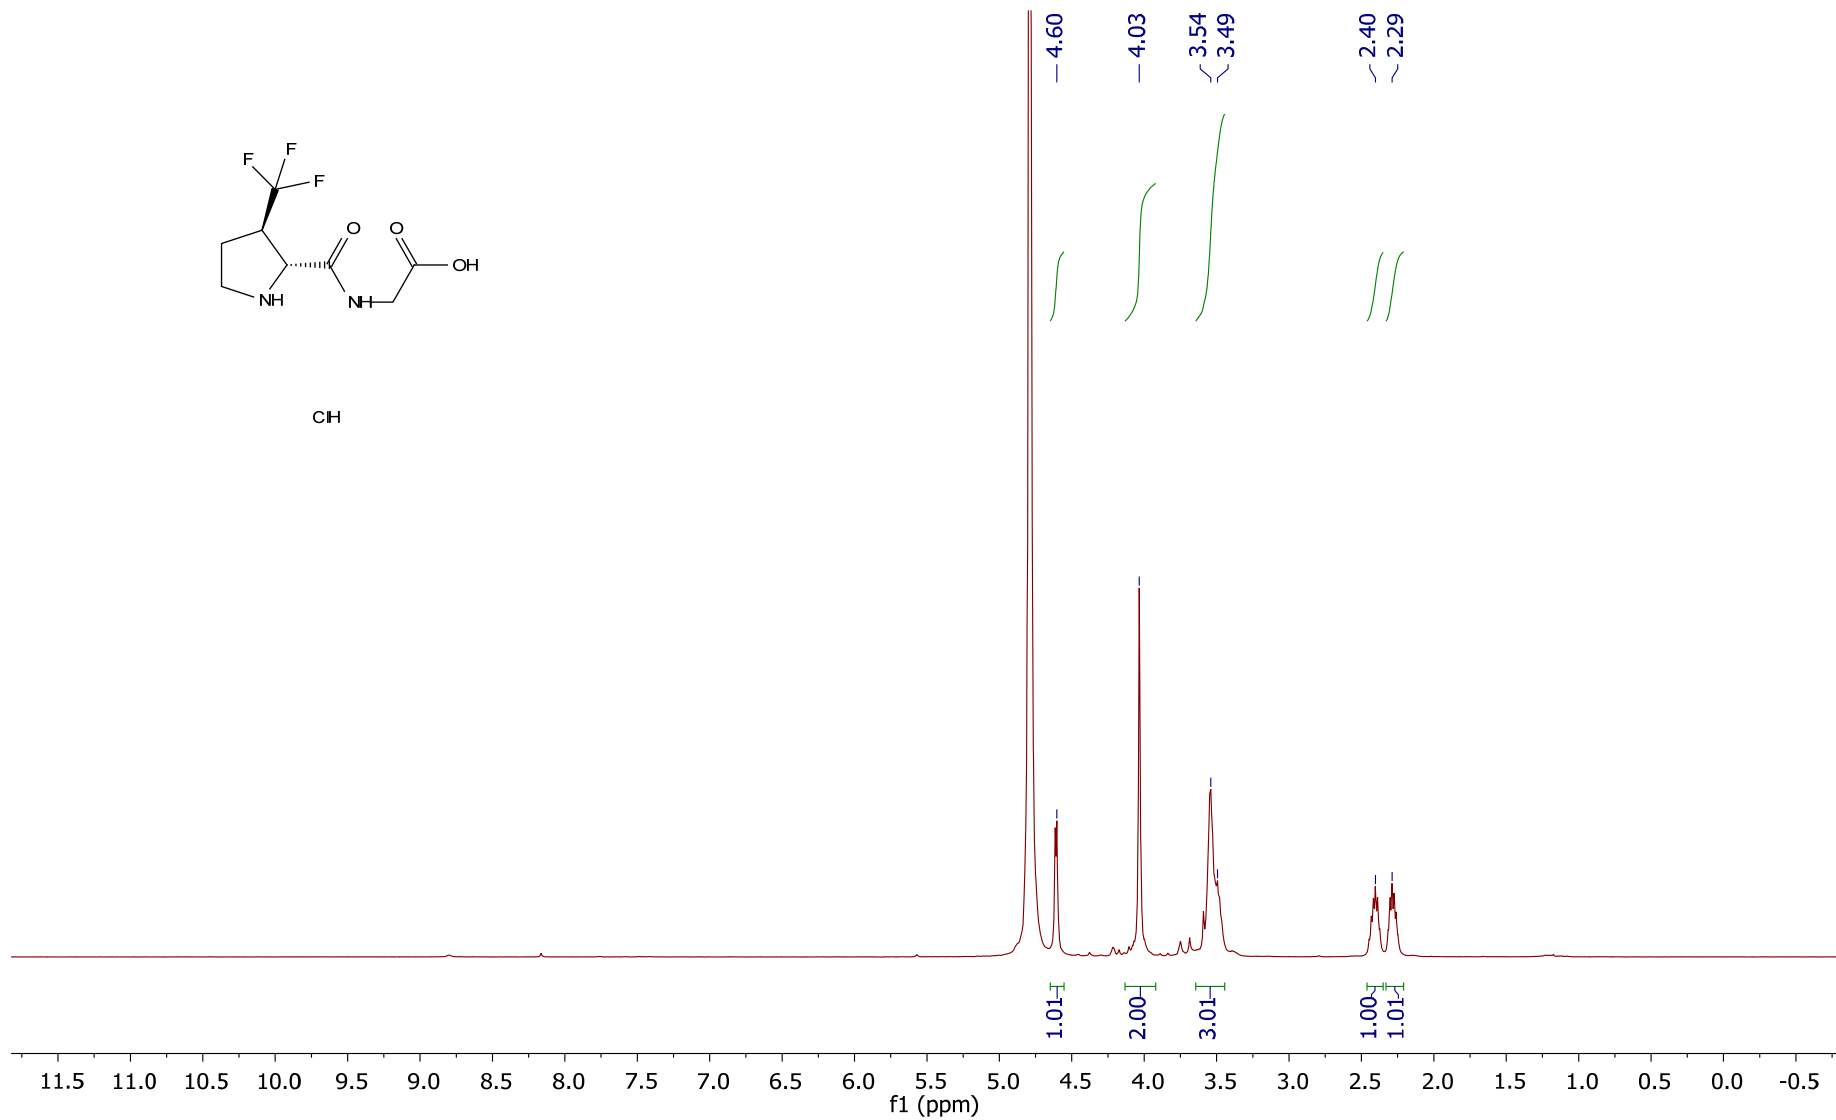

$^{13}\text{C}$  NMR spectrum of the compound (2*R*,3*R*)-**2a** (in  $\text{D}_2\text{O}$ ).

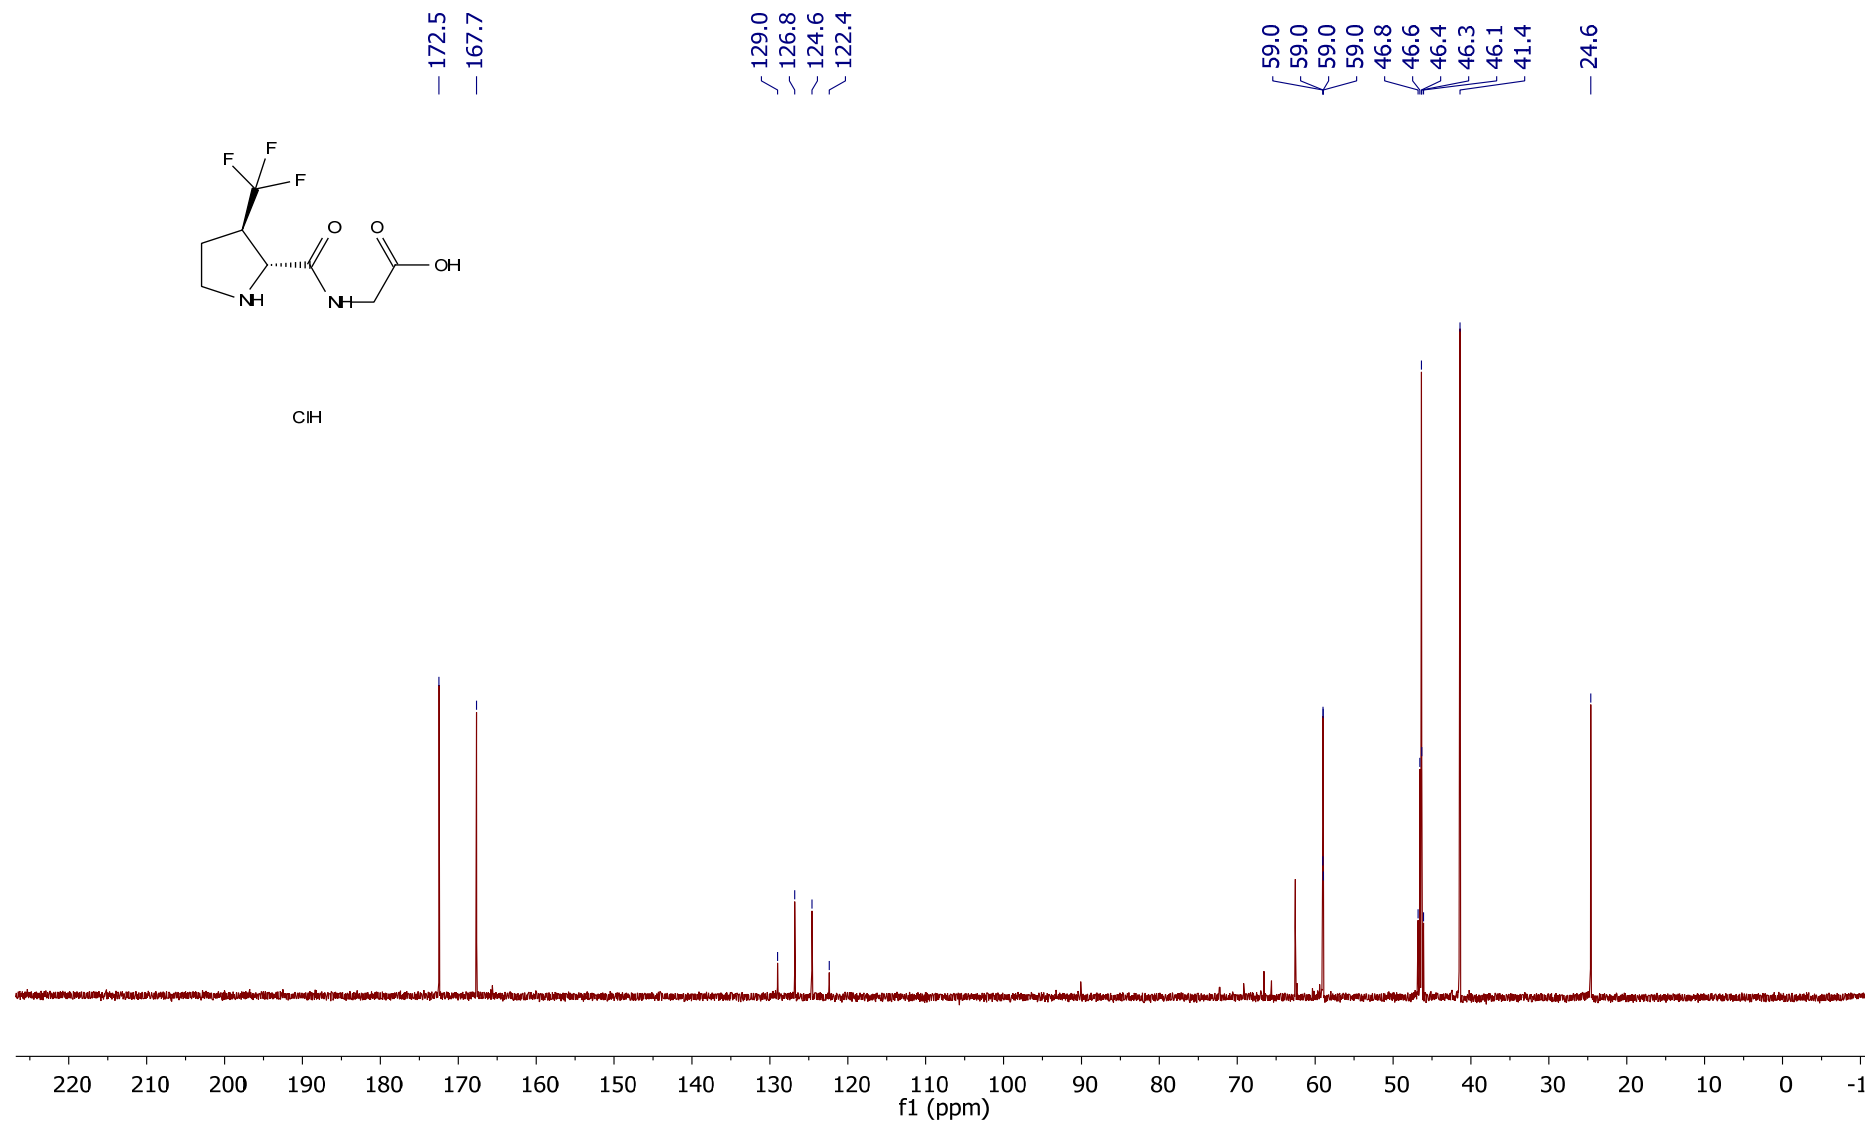

$^{19}\text{F}$  NMR spectrum of the compound (2*R*,3*R*)-**2a** (in  $\text{D}_2\text{O}$ ).

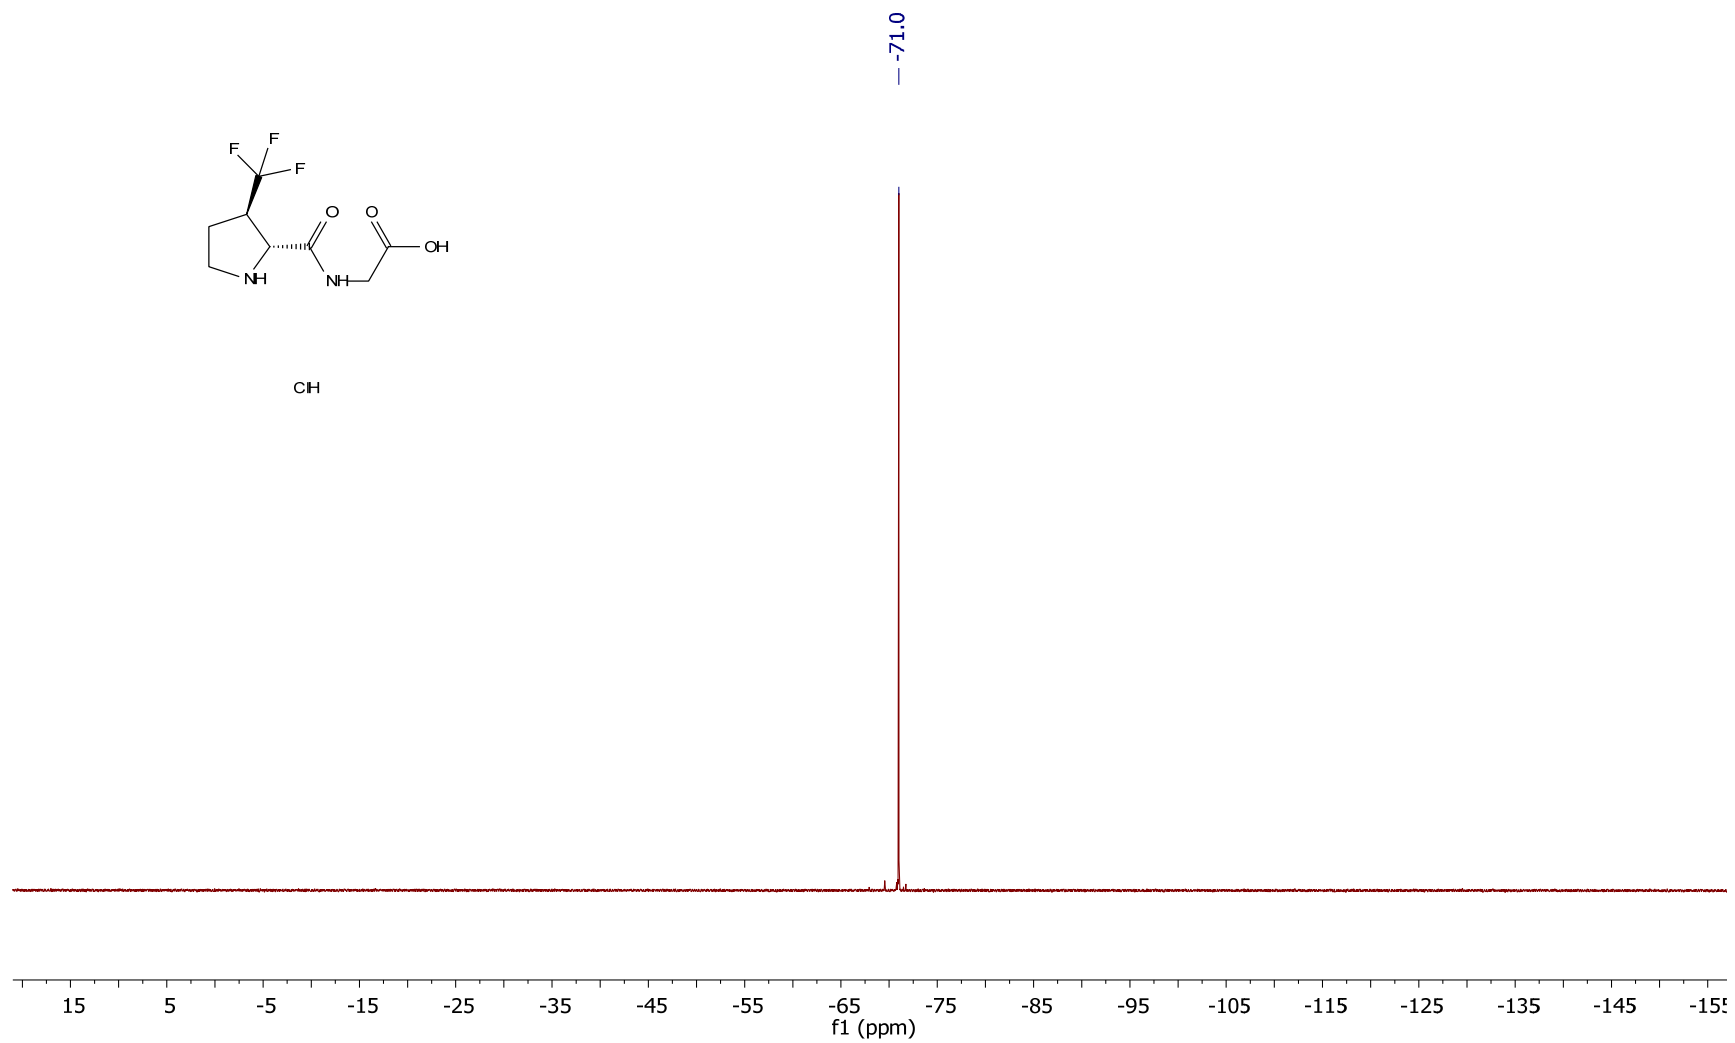

$^1\text{H}$  NMR spectrum of the compound (2*S*,3*S*)-**2b** (in  $\text{D}_2\text{O}$ ).

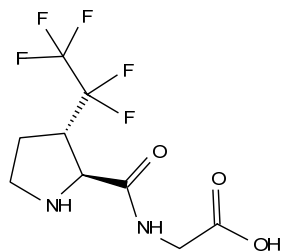

CH

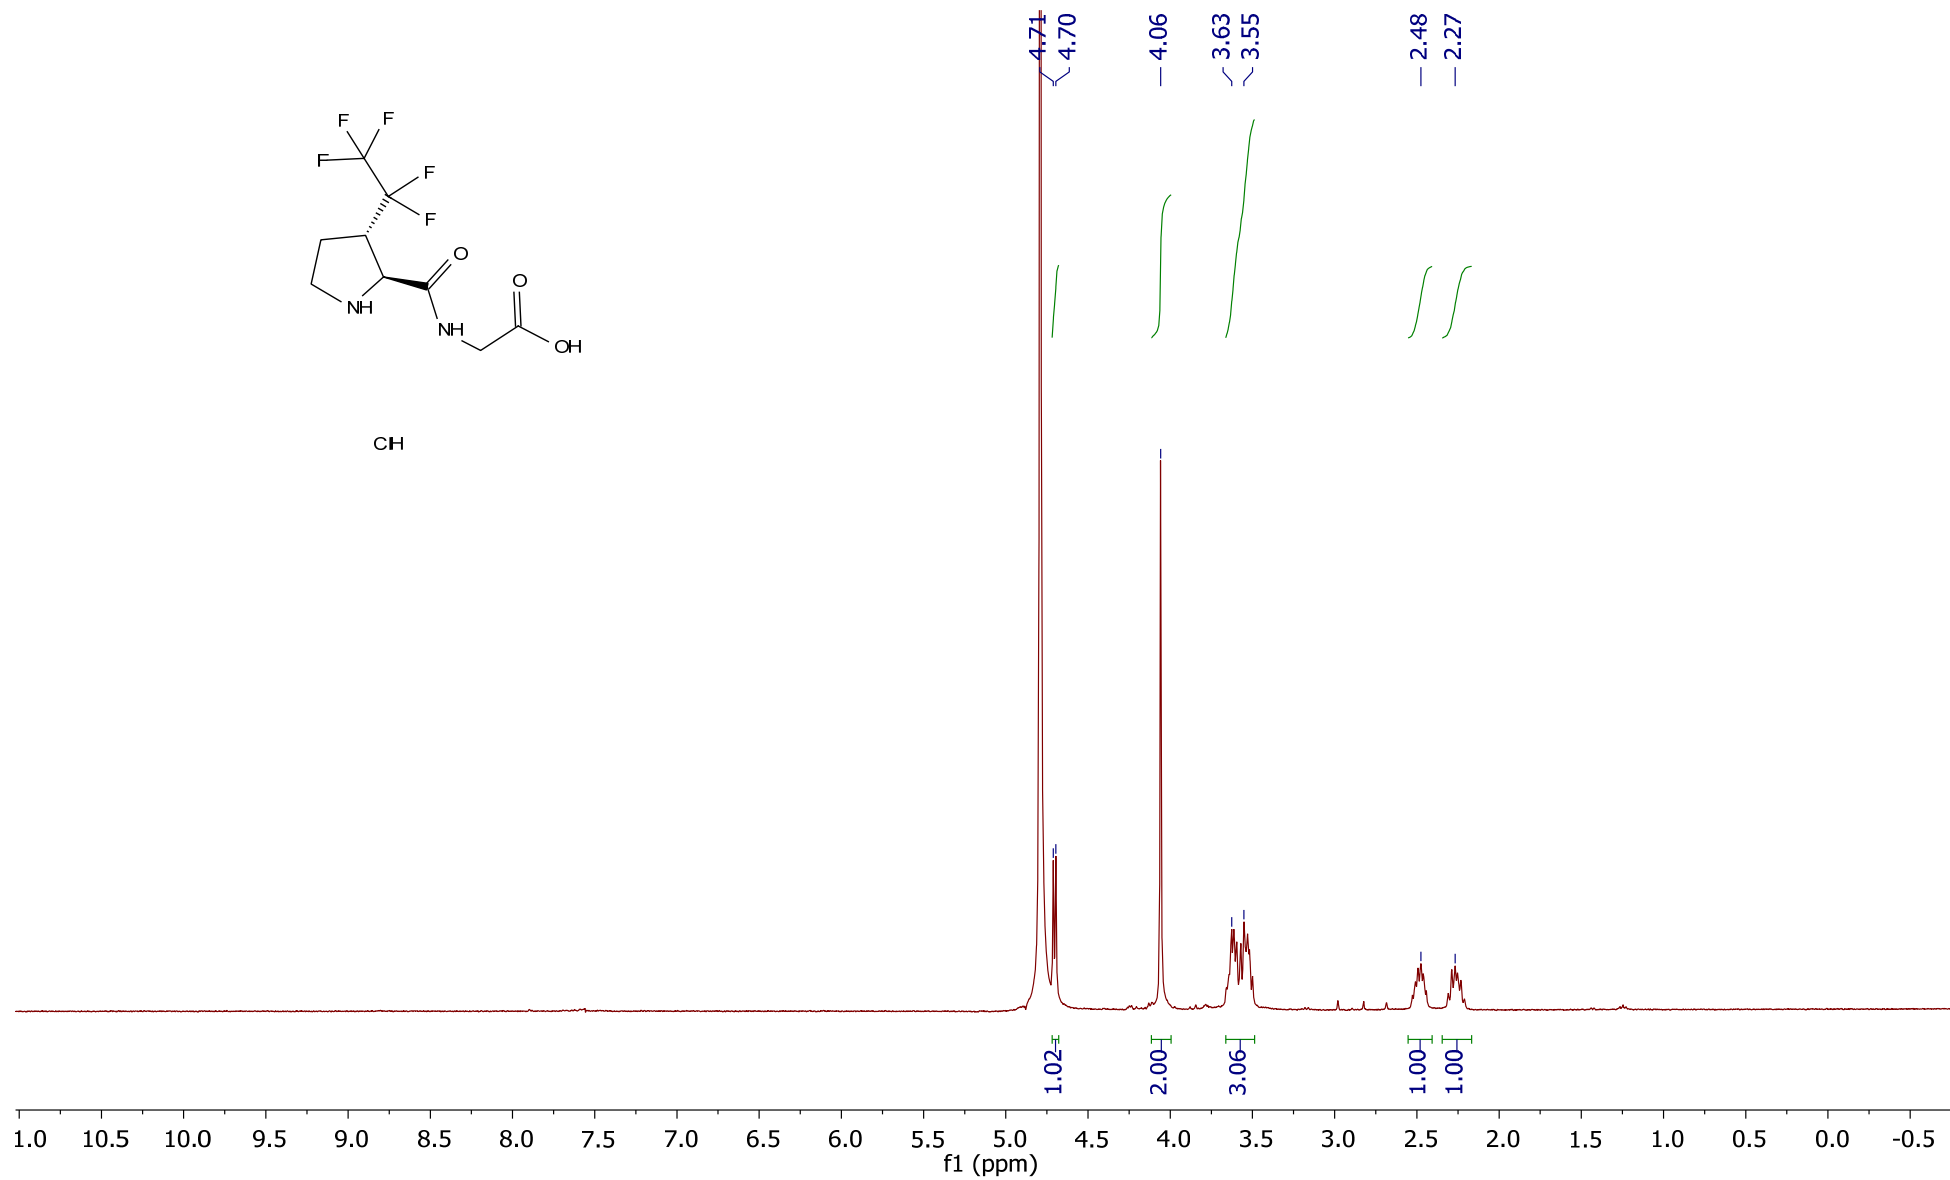

$^{13}\text{C}$  NMR spectrum of the compound (2*S*,3*S*)-**2b** (in  $\text{D}_2\text{O}$ ).

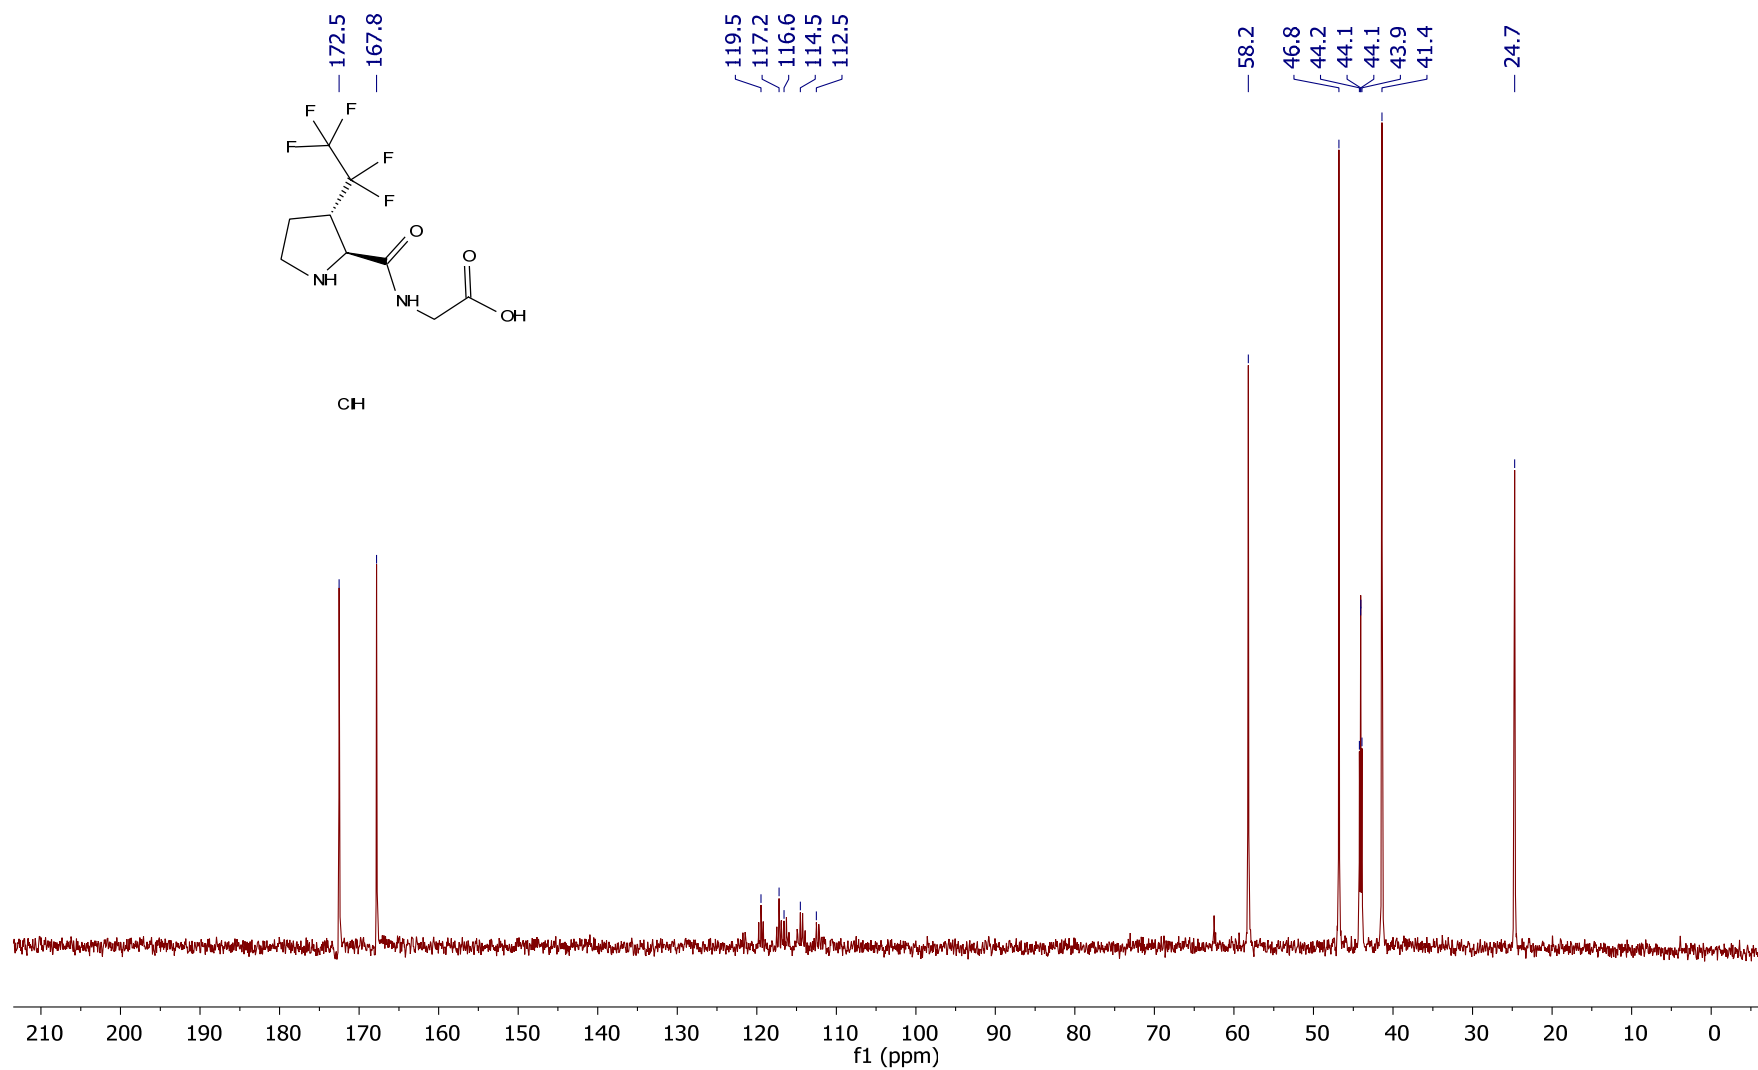

$^{19}\text{F}$  NMR spectrum of the compound (2*S*,3*S*)-**2b** (in  $\text{D}_2\text{O}$ ).

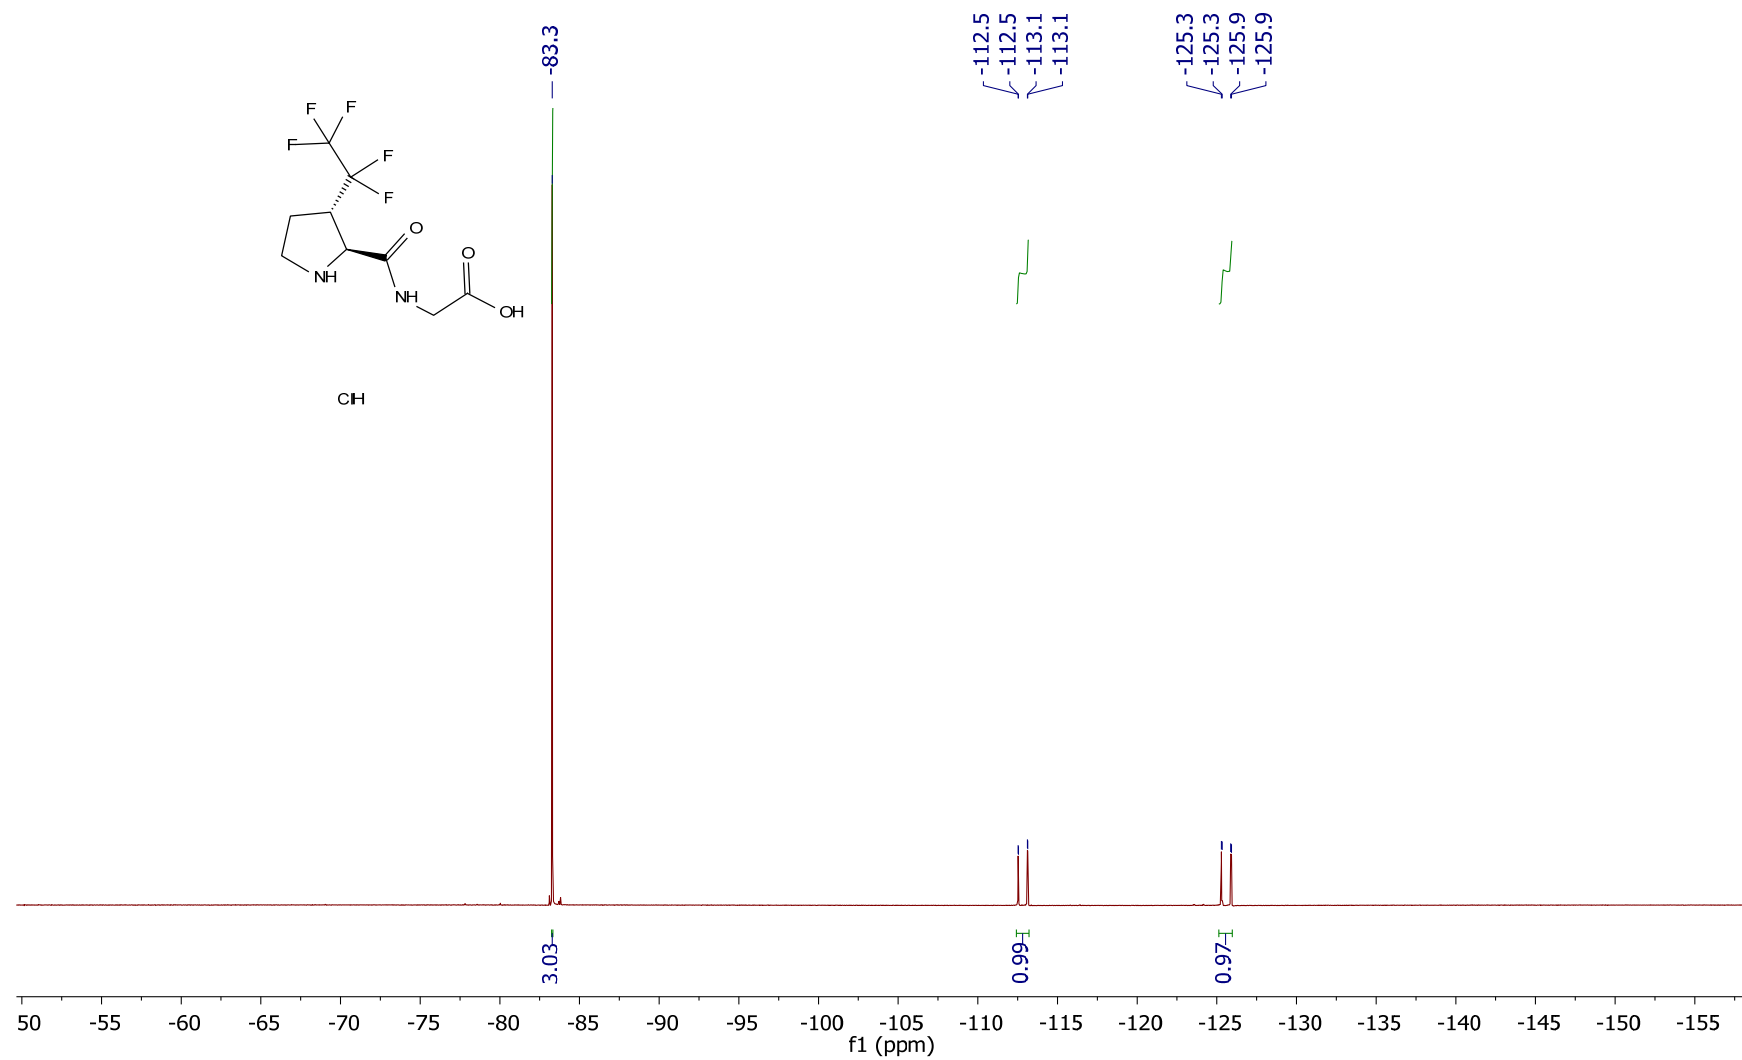

$^1\text{H}$  NMR spectrum of the compound (2*R*,3*R*)-**2b** (in  $\text{D}_2\text{O}$ ).

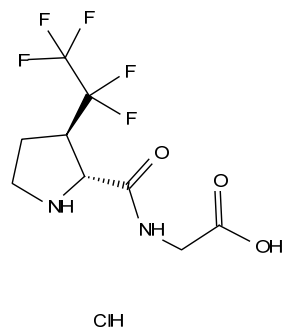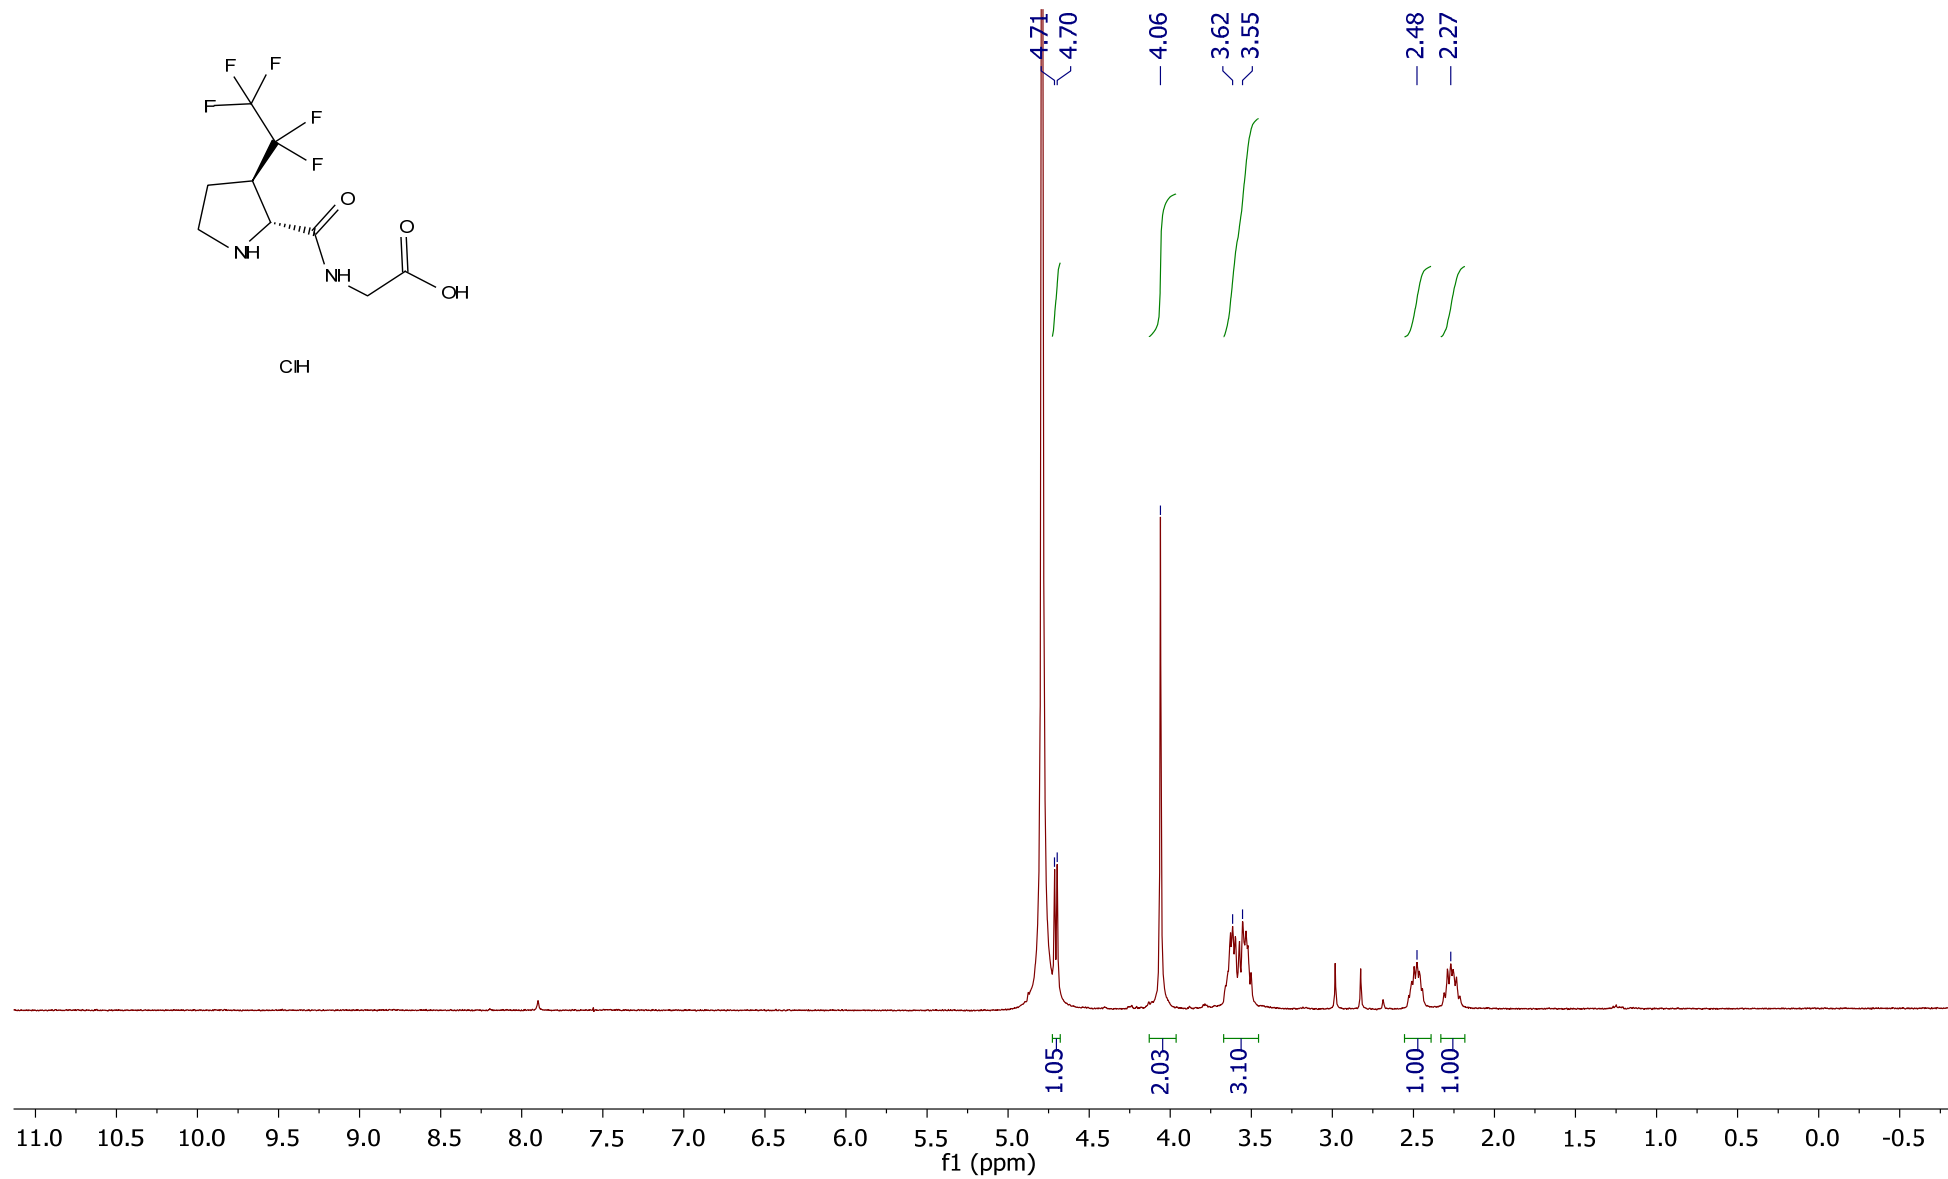

<sup>13</sup>C NMR spectrum of the compound (2*R*,3*R*)-**2b** (in D<sub>2</sub>O).

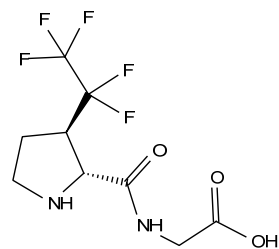

CH

— 172.5

— 167.8

— 119.5

— 117.2

— 112.2

— 58.2

— 46.8

— 44.2

— 44.1

— 43.9

— 41.4

— 24.7

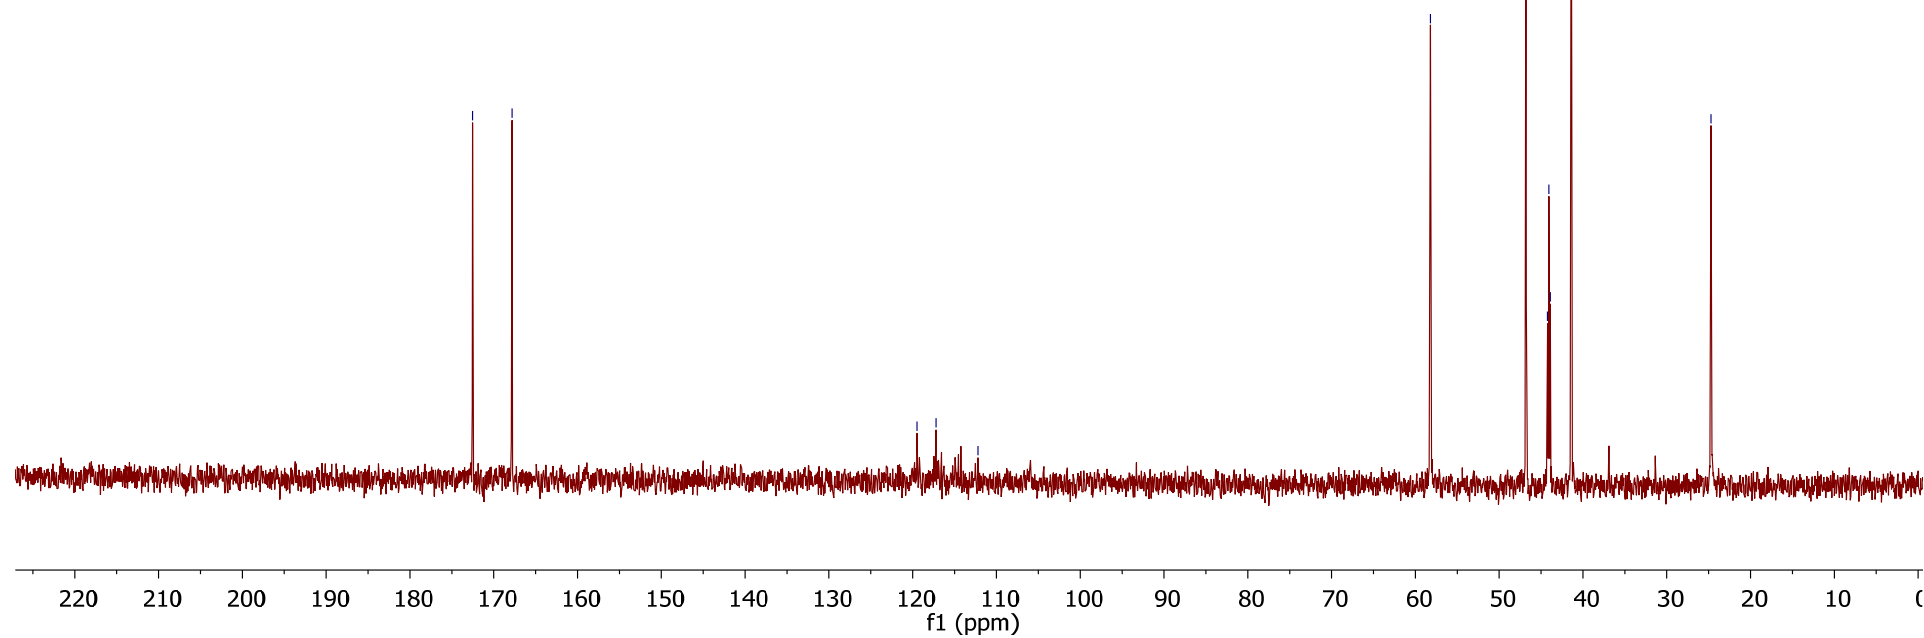



$^{19}\text{F}$  NMR spectrum of the compound (2*R*,3*R*)-**2b** (in  $\text{D}_2\text{O}$ ).

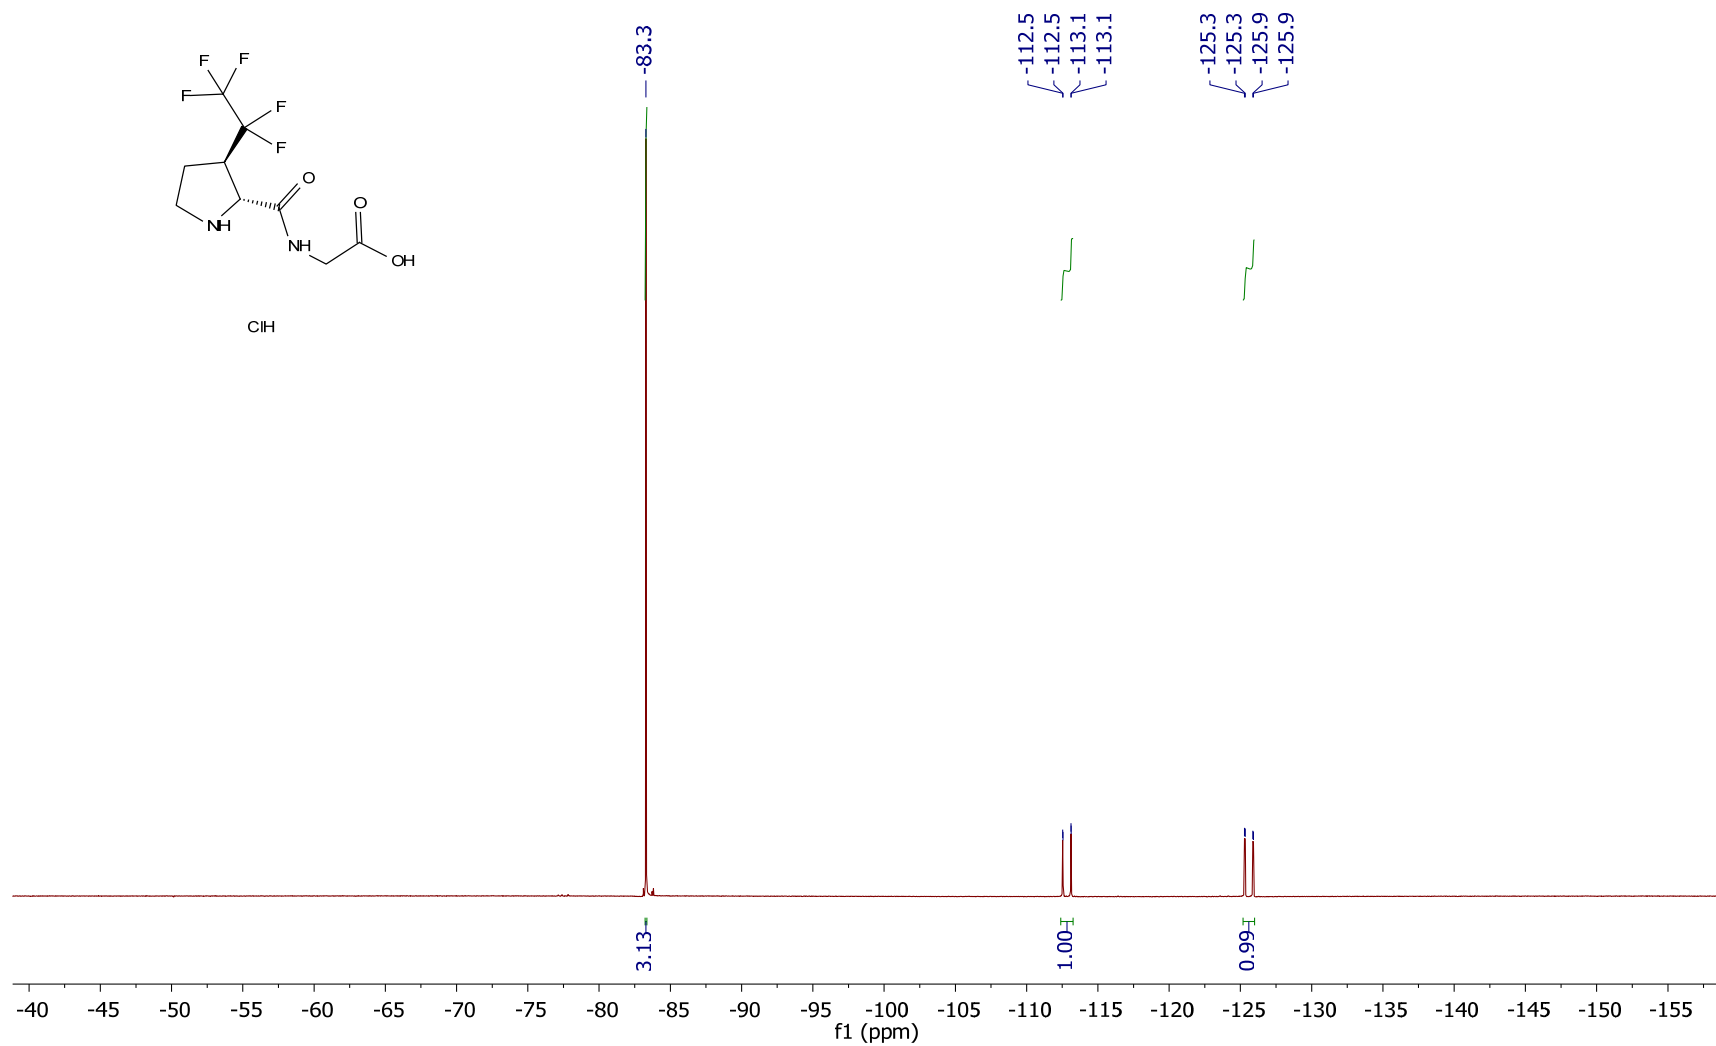

$^1\text{H}$  NMR spectrum of the compound (2*S*,3*R*)-**2a** (in  $\text{D}_2\text{O}$ ).

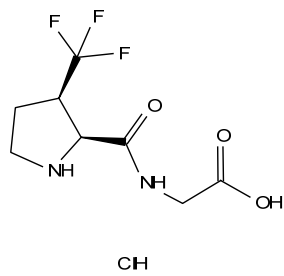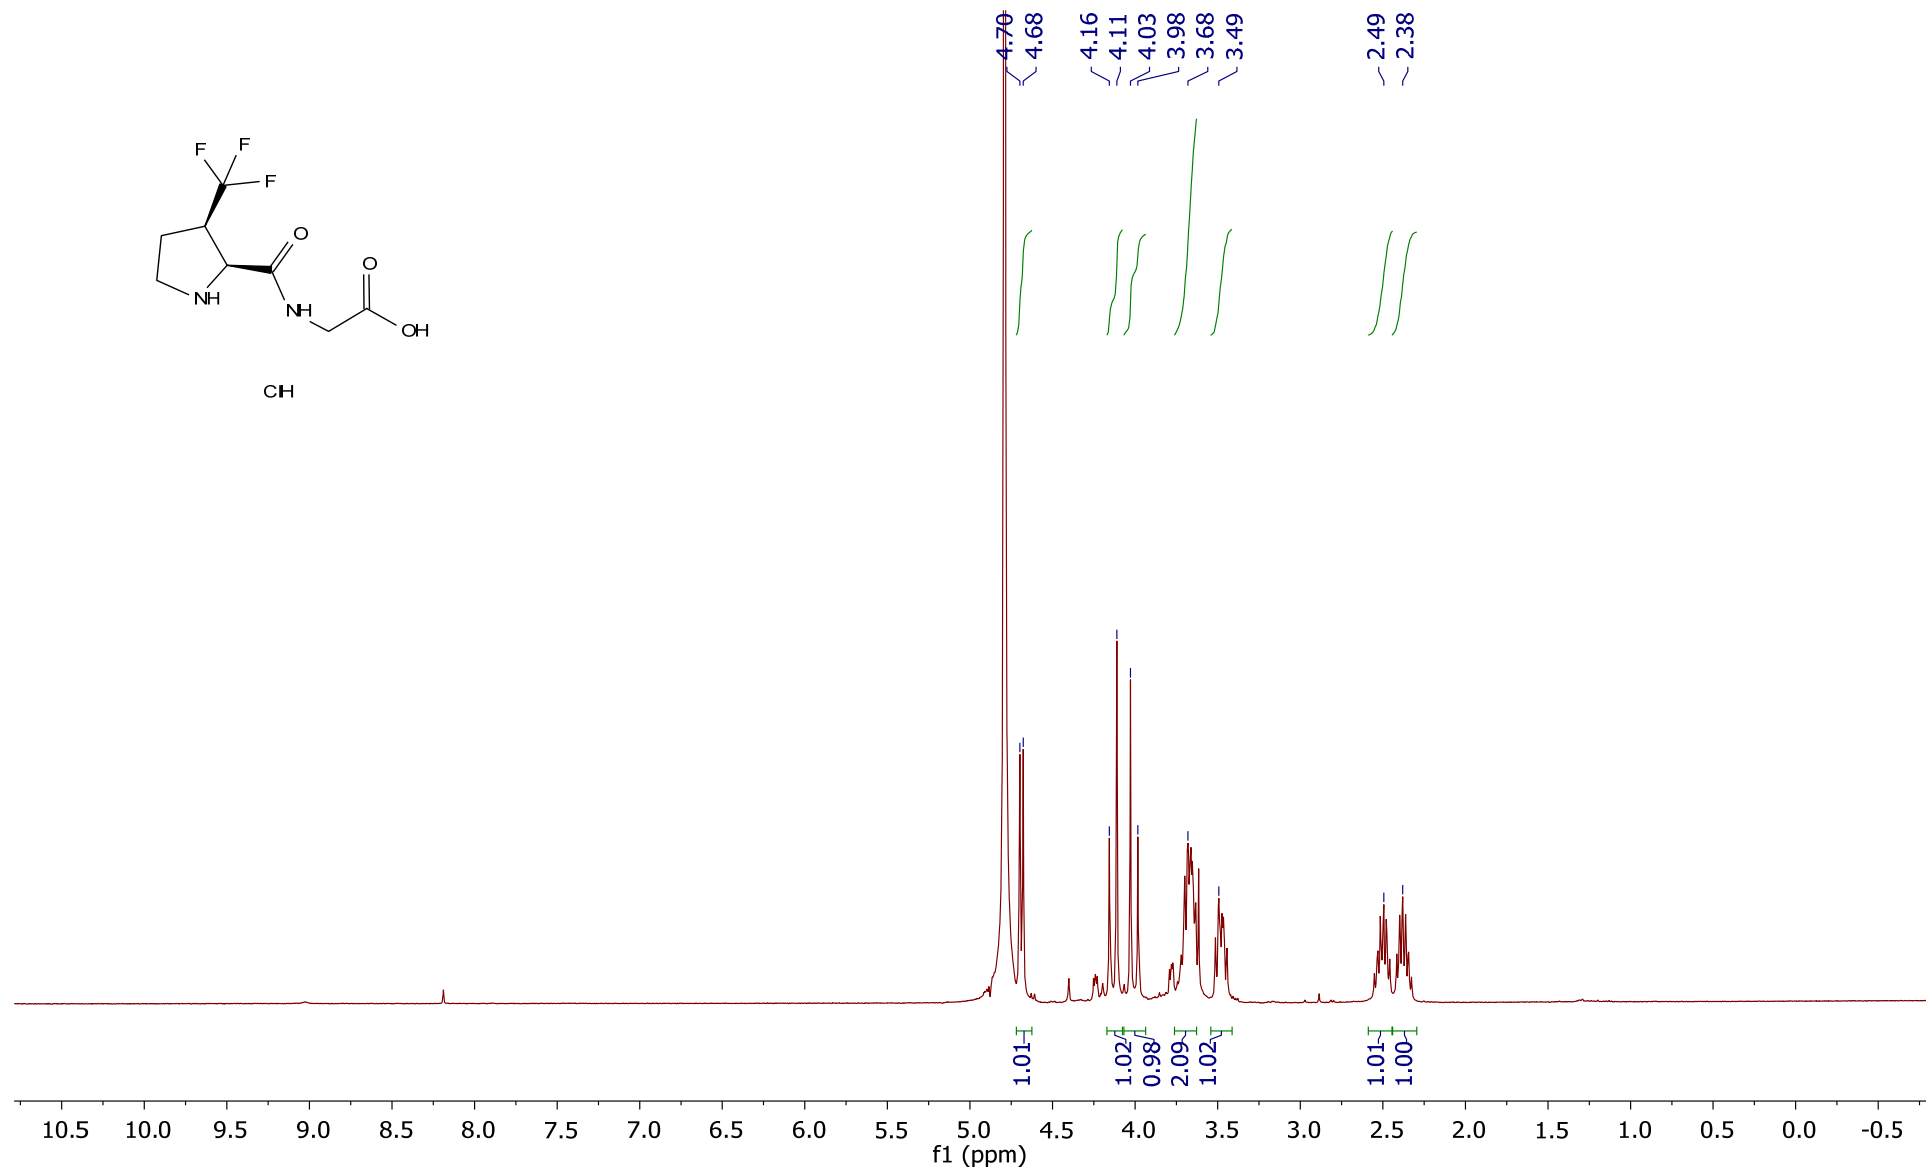

$^{13}\text{C}$  NMR spectrum of the compound (2*S*,3*R*)-**2a** (in  $\text{D}_2\text{O}$ ).

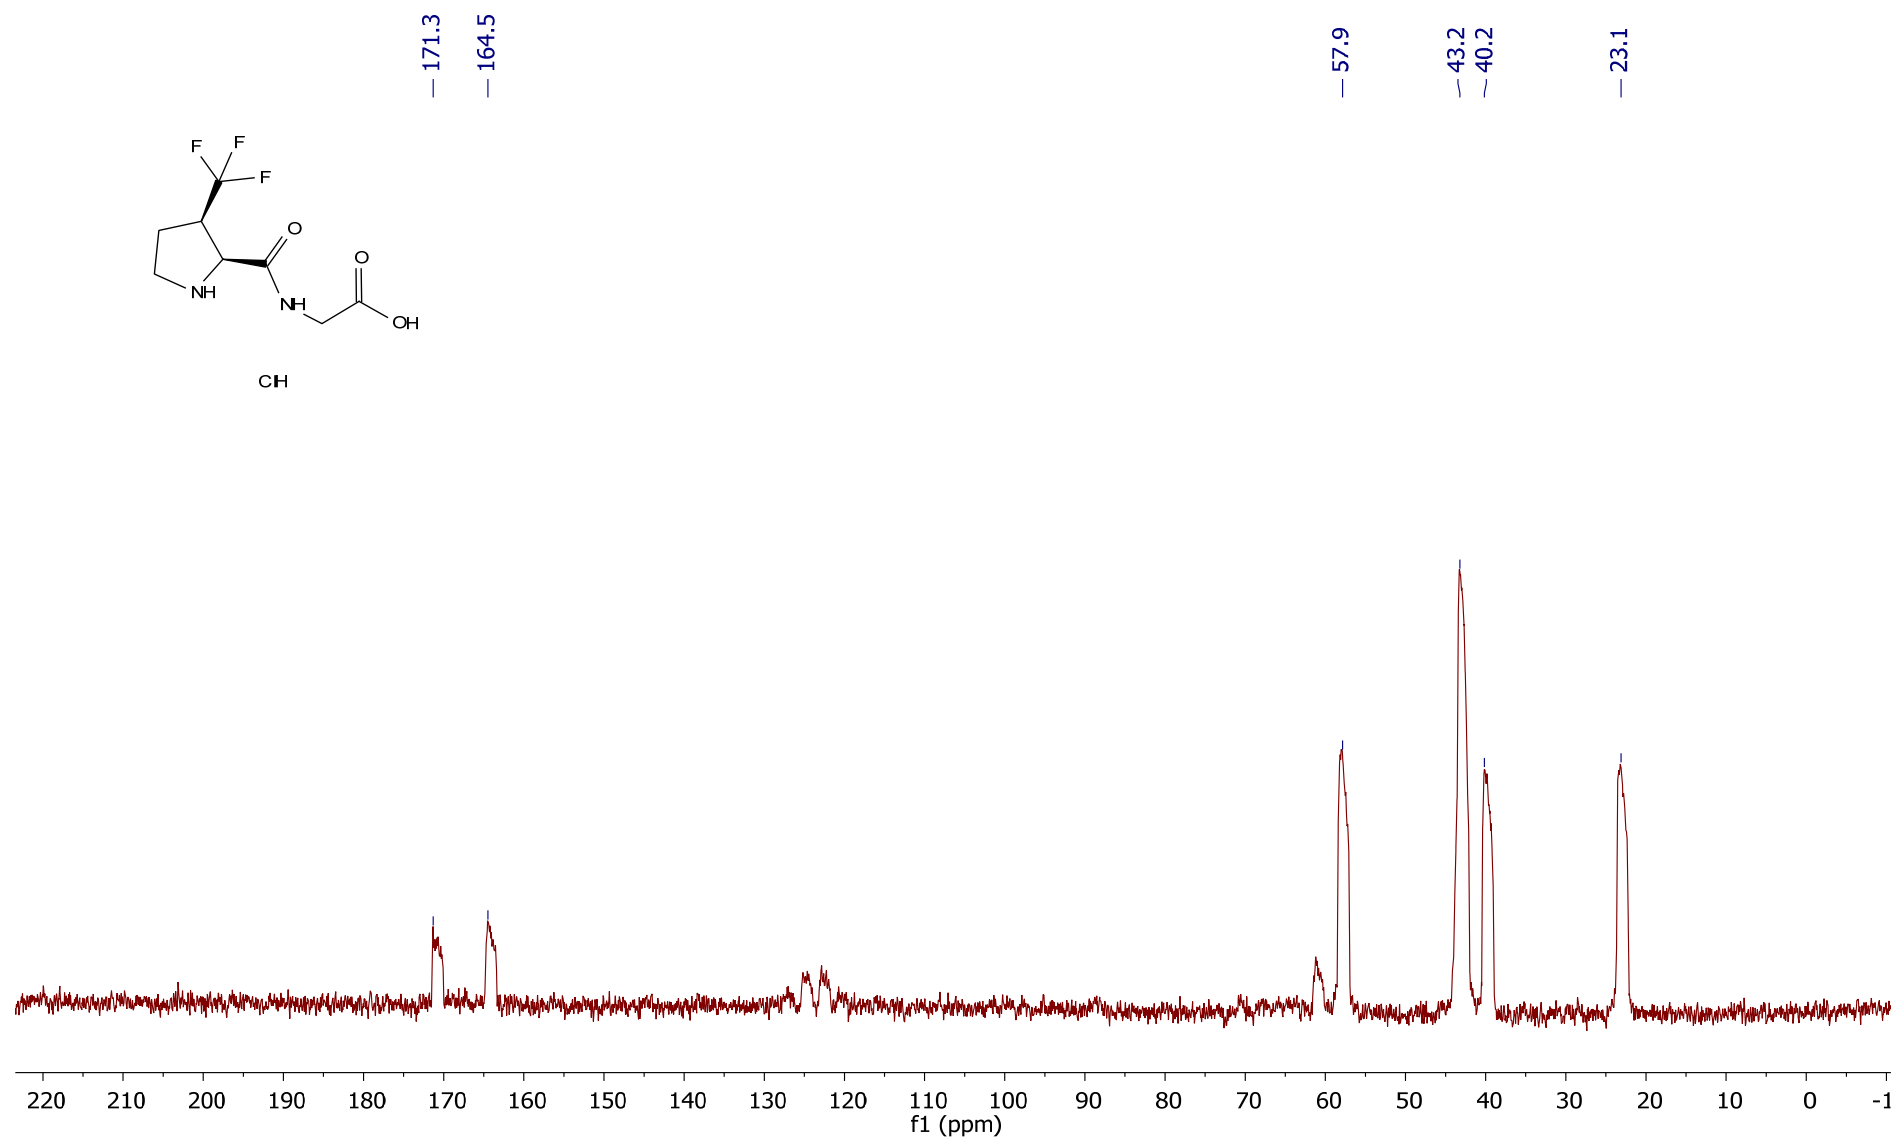

$^{19}\text{F}$  NMR spectrum of the compound (2*S*,3*R*)-**2a** (in  $\text{D}_2\text{O}$ ).

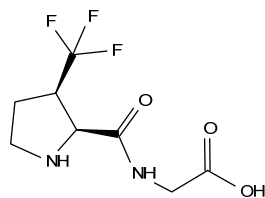

CH

-67.5  
-67.5

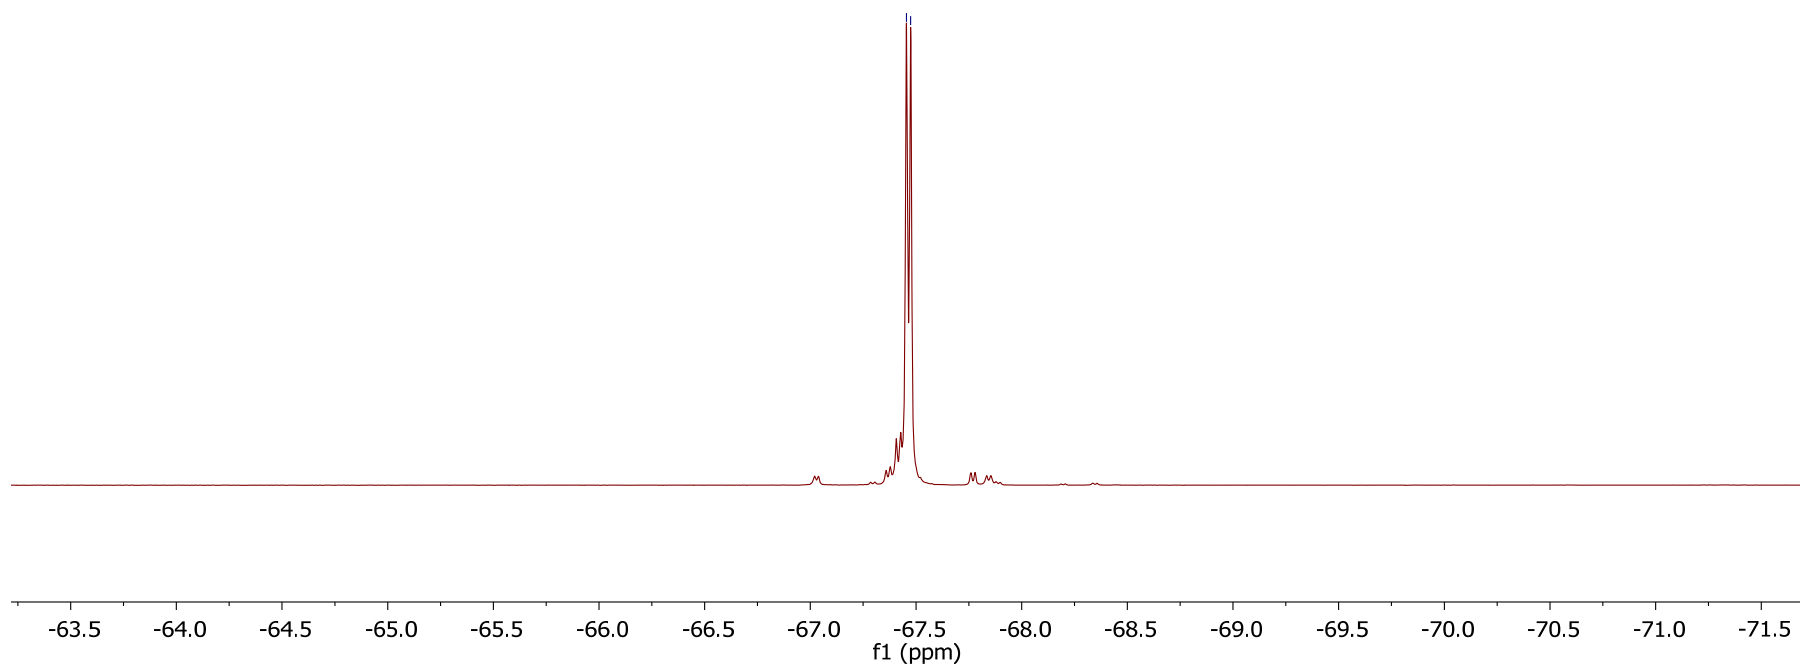

$^1\text{H}$  NMR spectrum of the compound (2*R*,3*S*)-**2a** (in  $\text{D}_2\text{O}$ ).

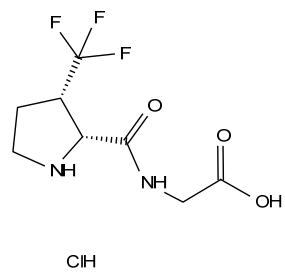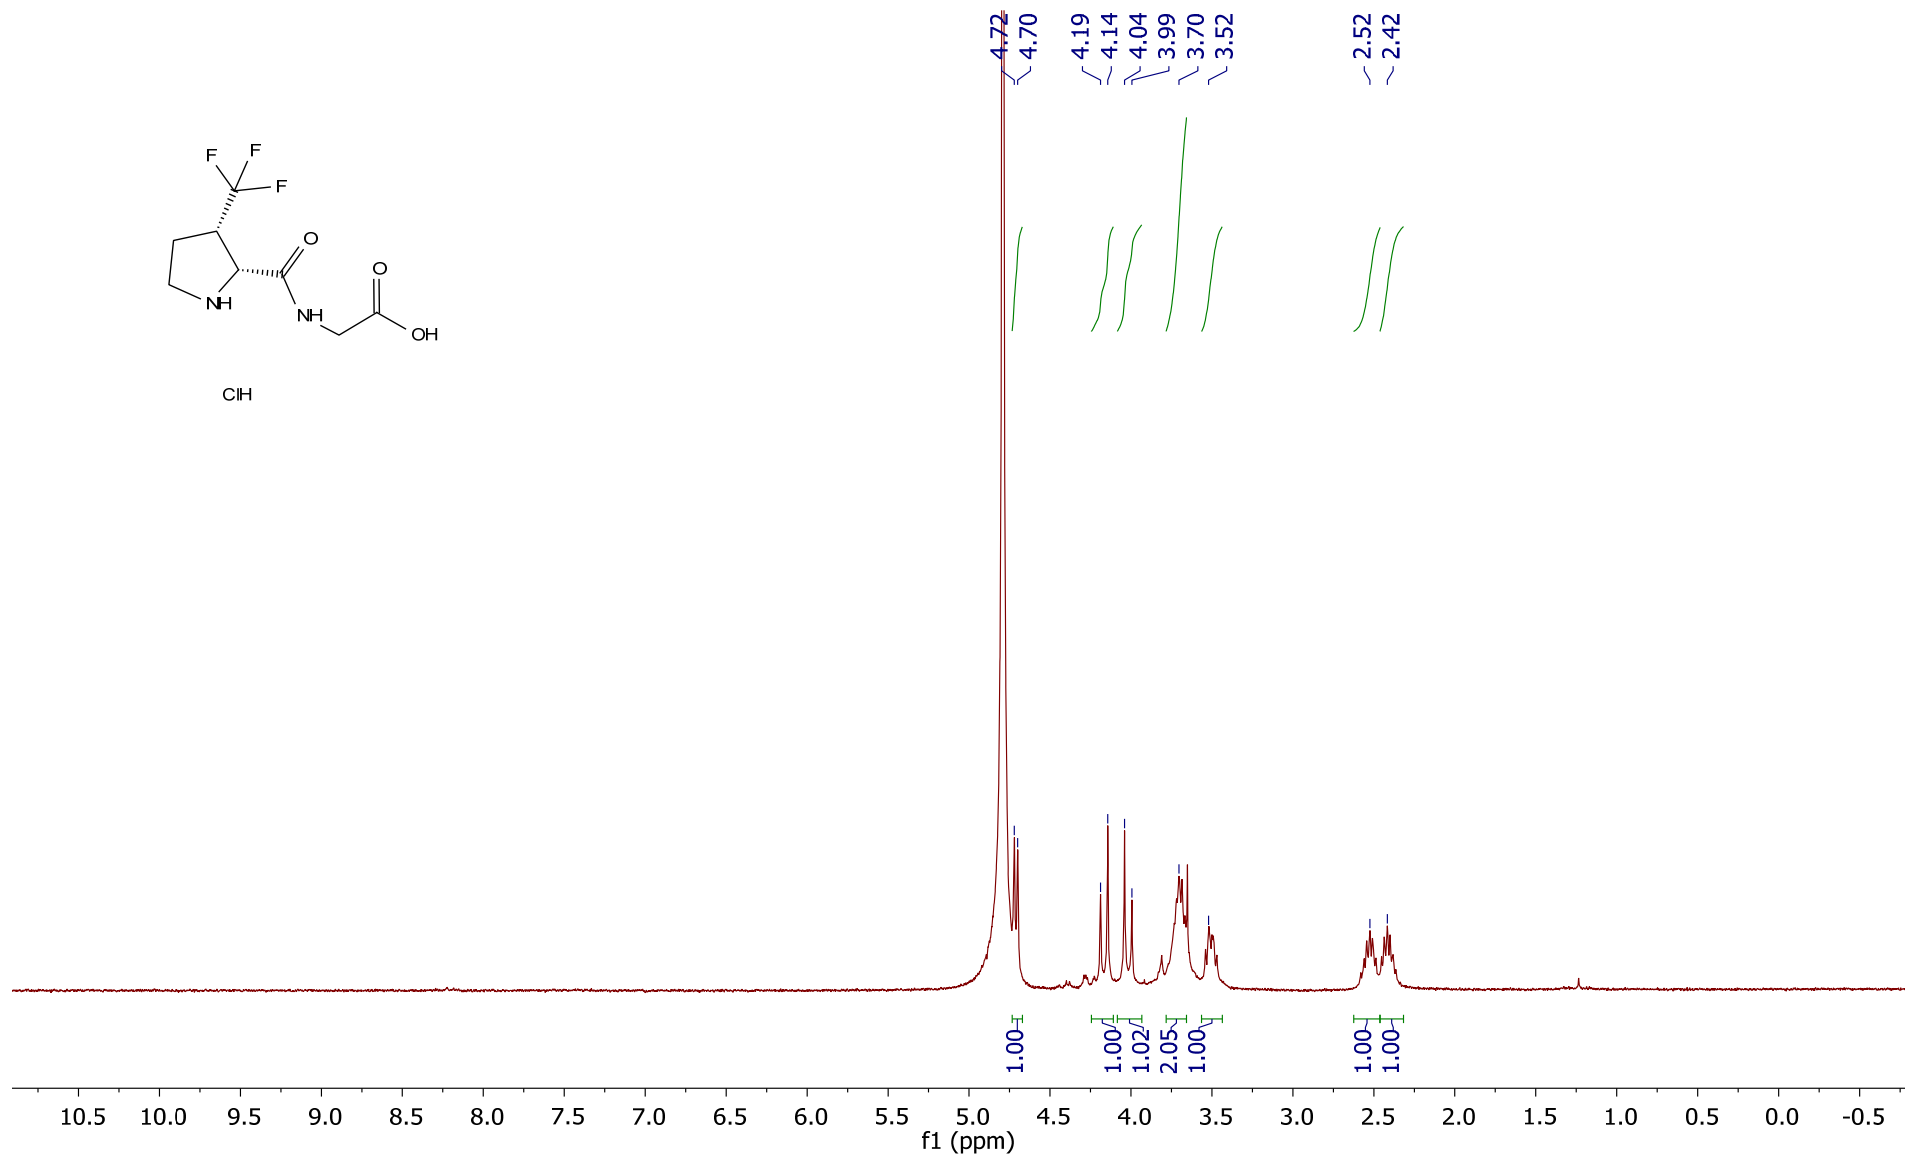

<sup>13</sup>C NMR spectrum of the compound (2*R*,3*S*)-**2a** (in D<sub>2</sub>O).

— 172.6  
— 165.7  
/ 128.5  
/ 126.3  
/ 124.1  
/ 121.9  
— 59.3  
45.1  
44.9  
44.6  
44.4  
44.3  
41.4  
— 24.5

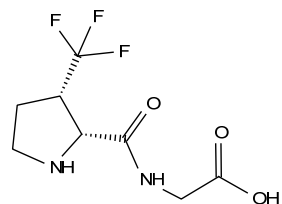

CH

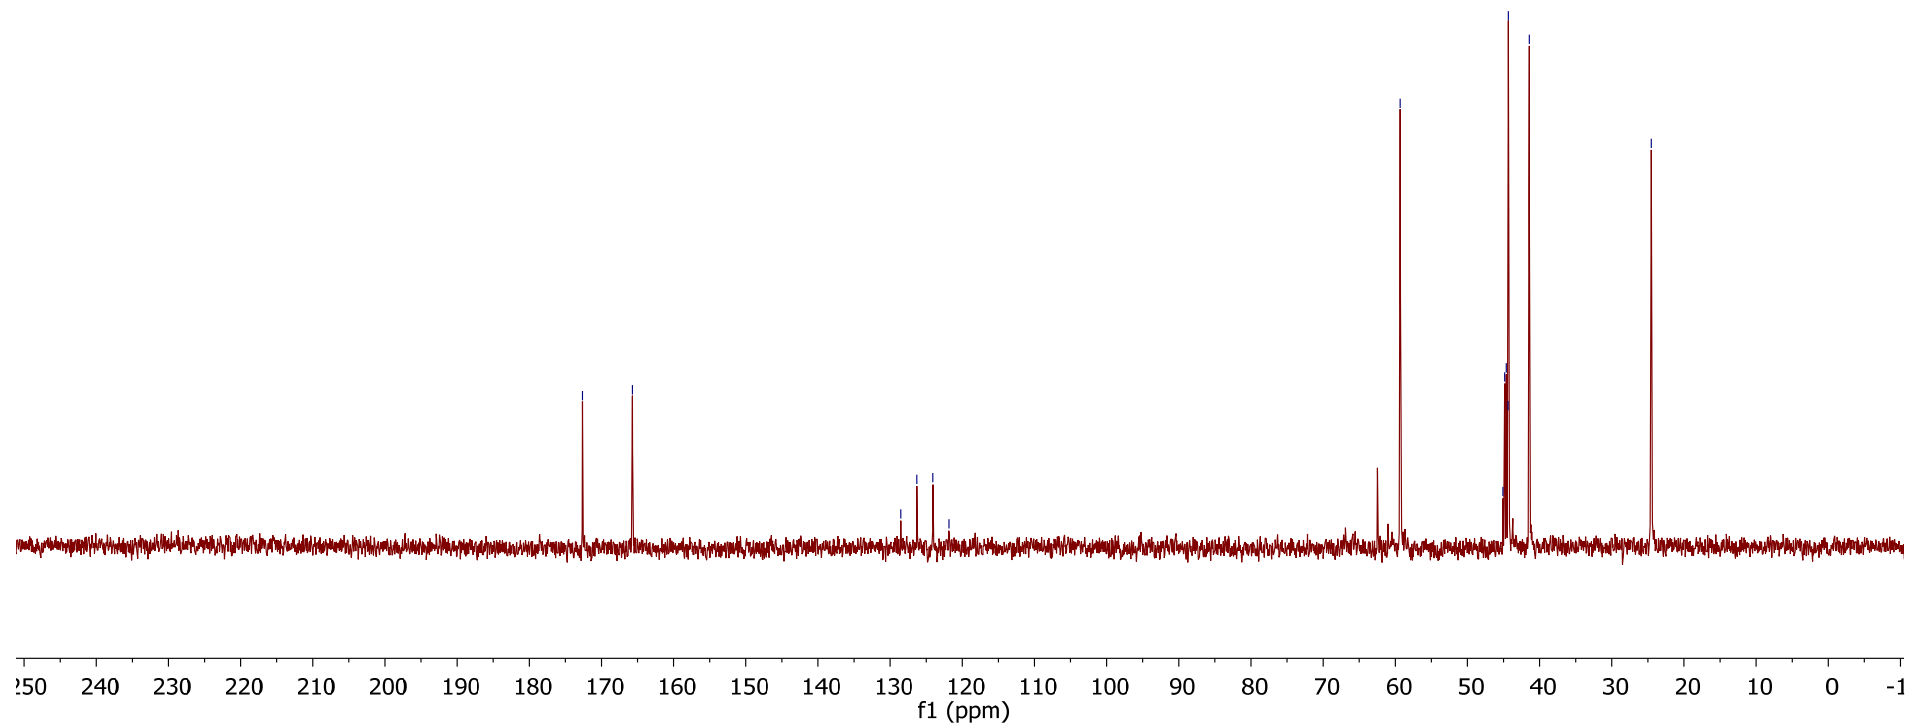

$^{19}\text{F}$  NMR spectrum of the compound (2*R*,3*S*)-**2a** (in  $\text{D}_2\text{O}$ ).

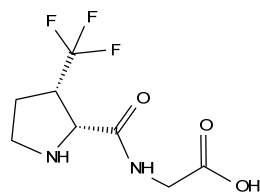

CH

-67.5  
-67.5

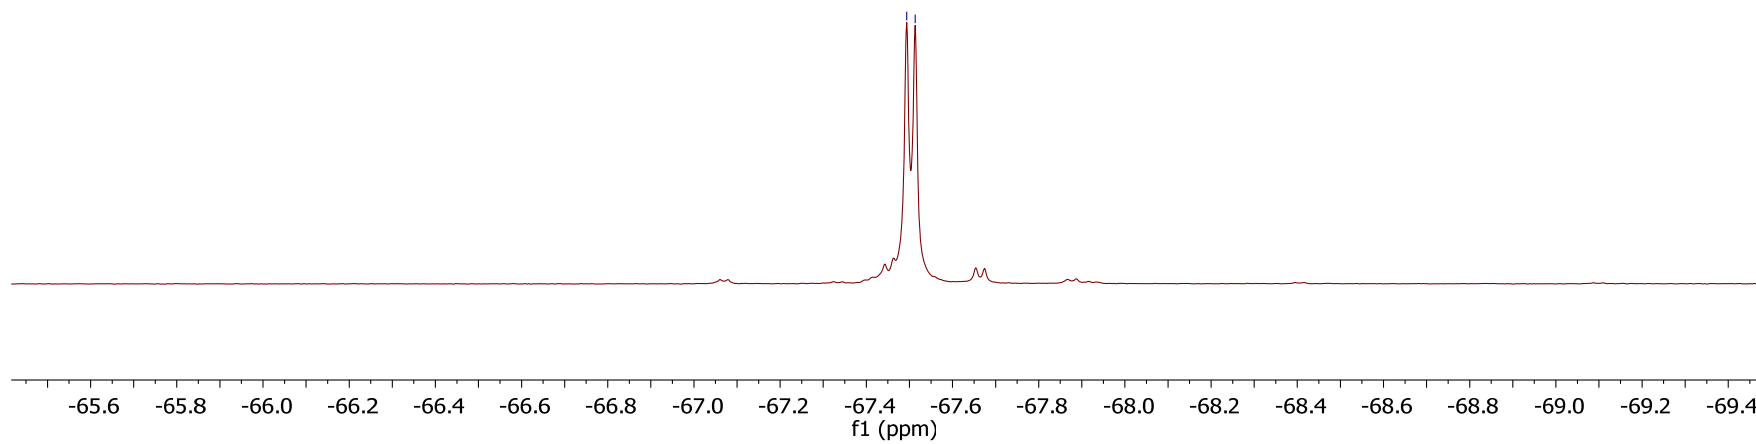

$^1\text{H}$  NMR spectrum of the compound (2*S*,3*R*)-**2b** (in  $\text{D}_2\text{O}$ ).

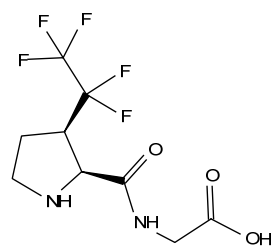

CH

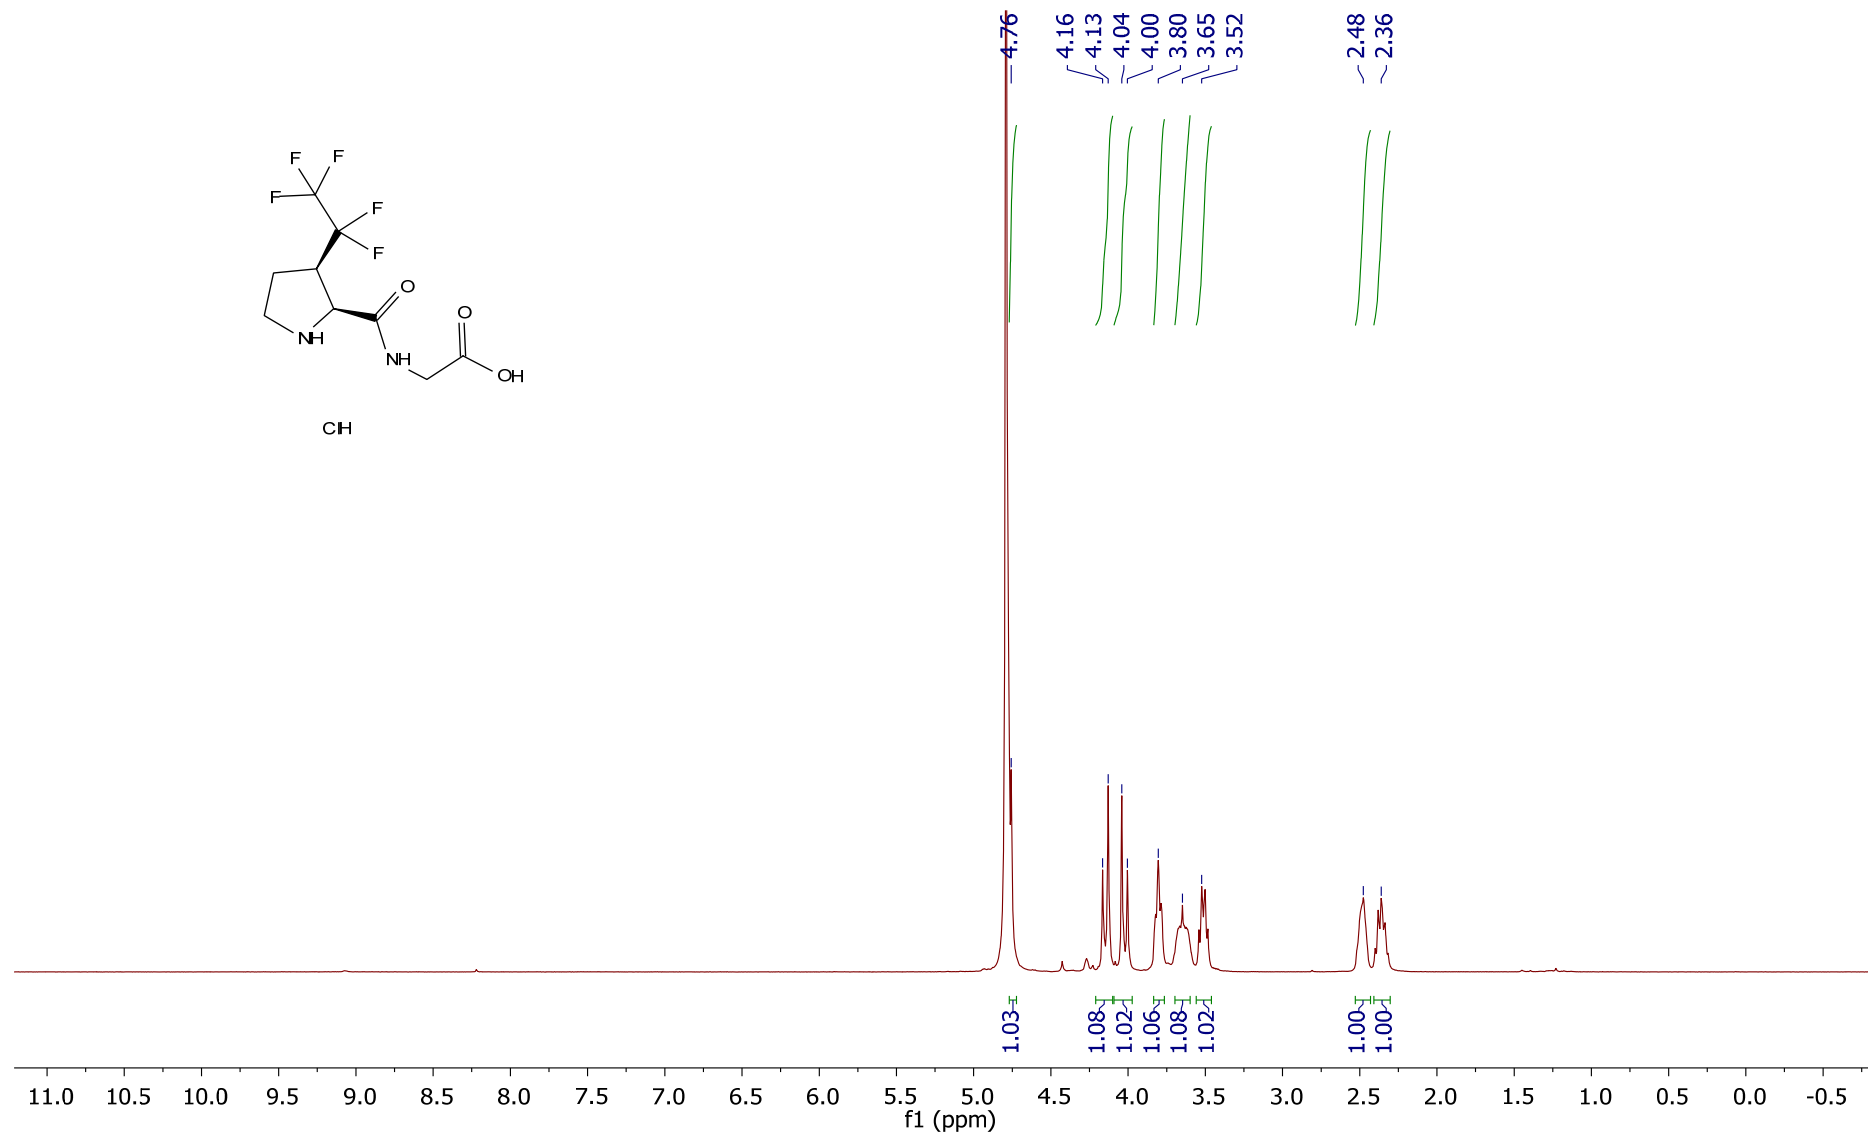



$^{13}\text{C}$  NMR spectrum of the compound (2*S*,3*R*)-**2b** (in  $\text{D}_2\text{O}$ ).

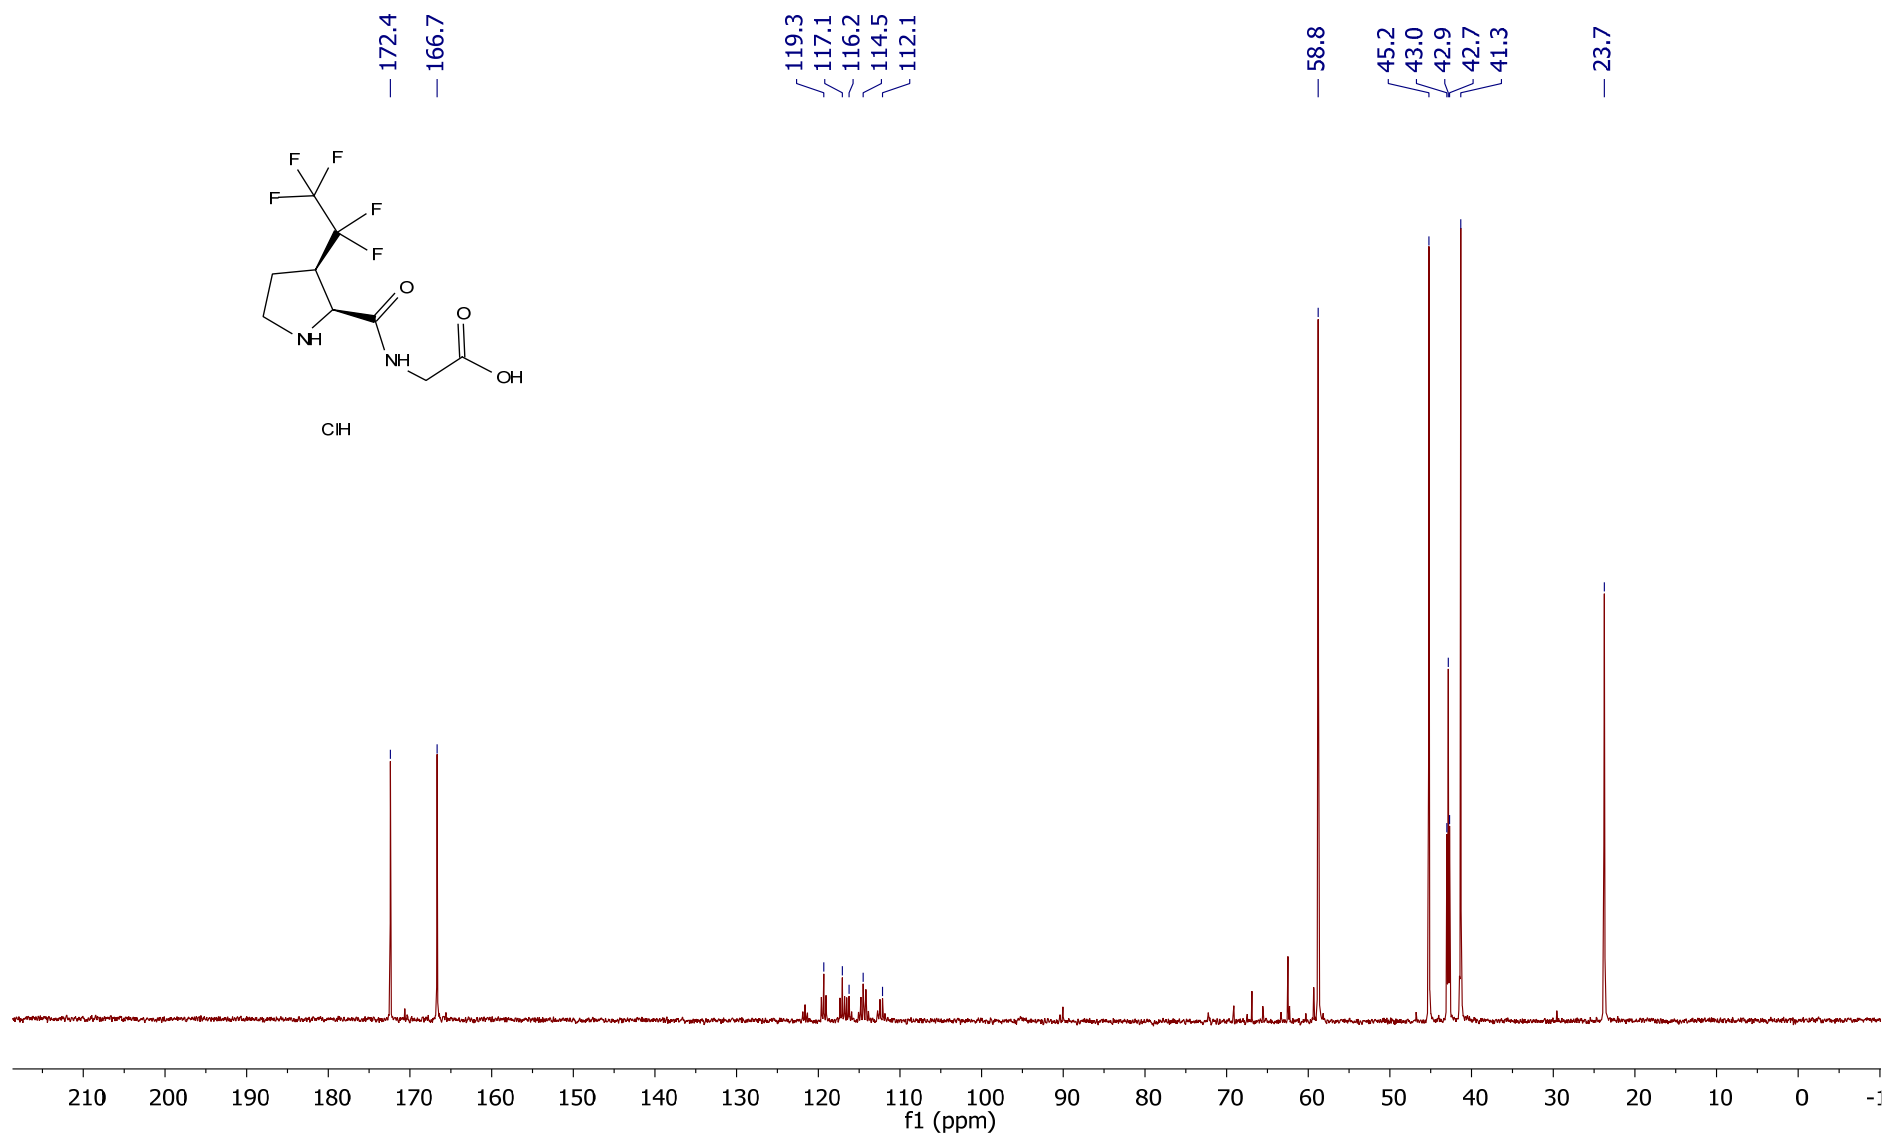

$^{19}\text{F}$  NMR spectrum of the compound (2*S*,3*R*)-**2b** (in  $\text{D}_2\text{O}$ ).

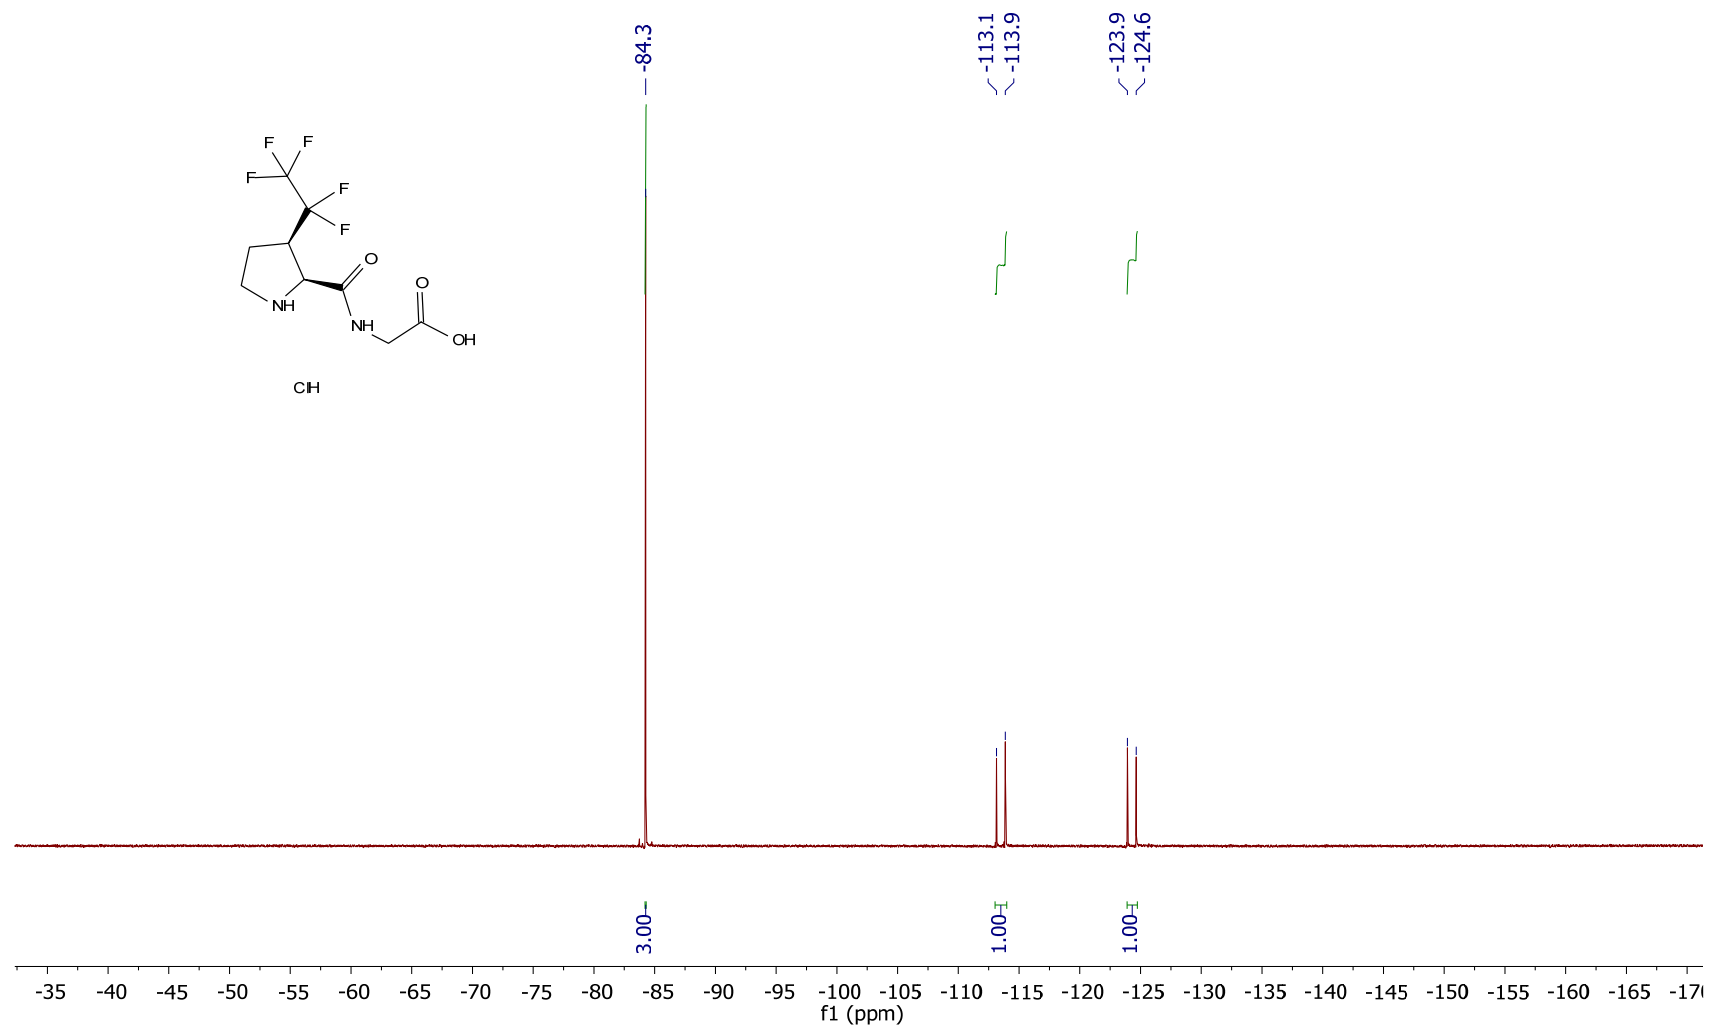

$^1\text{H}$  NMR spectrum of the compound (2*R*,3*S*)-**2b** (in  $\text{D}_2\text{O}$ ).

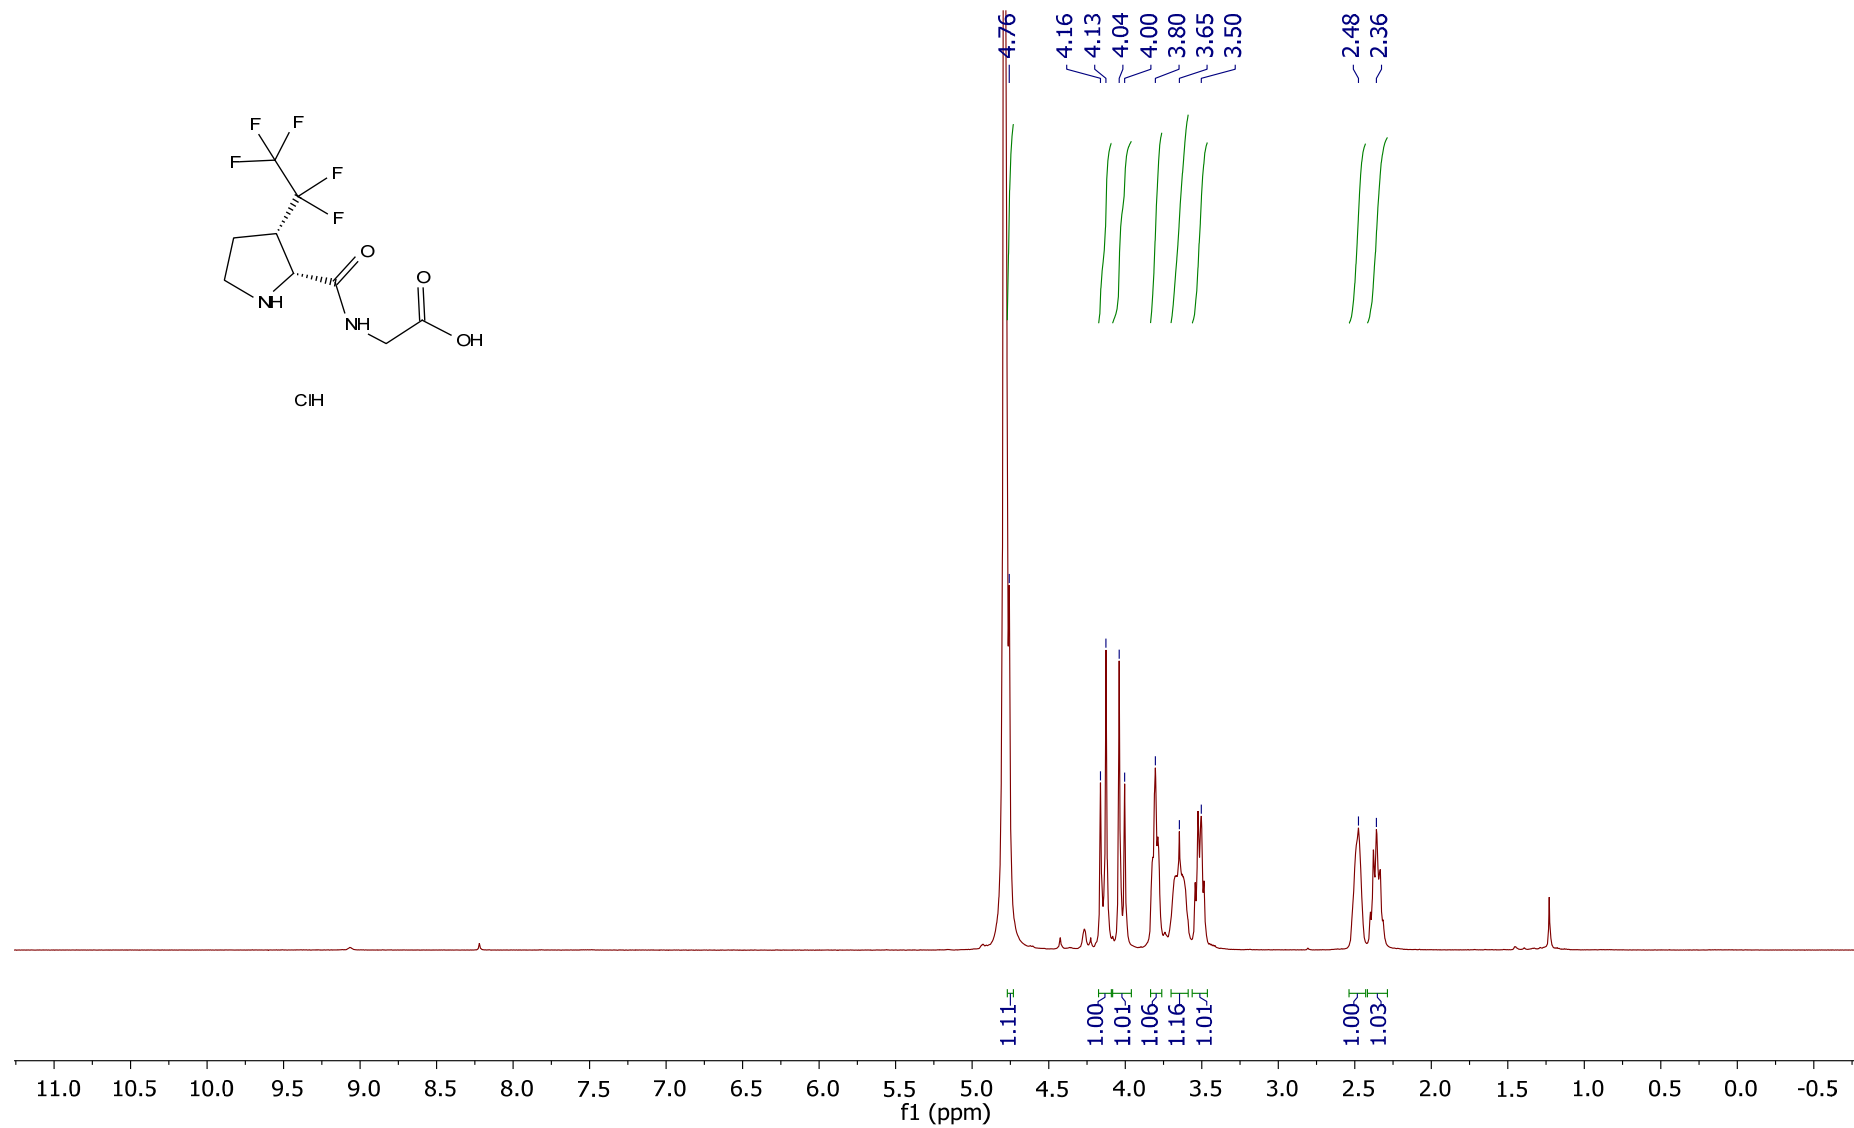

$^{13}\text{C}$  NMR spectrum of the compound (2*R*,3*S*)-**2b** (in  $\text{D}_2\text{O}$ ).

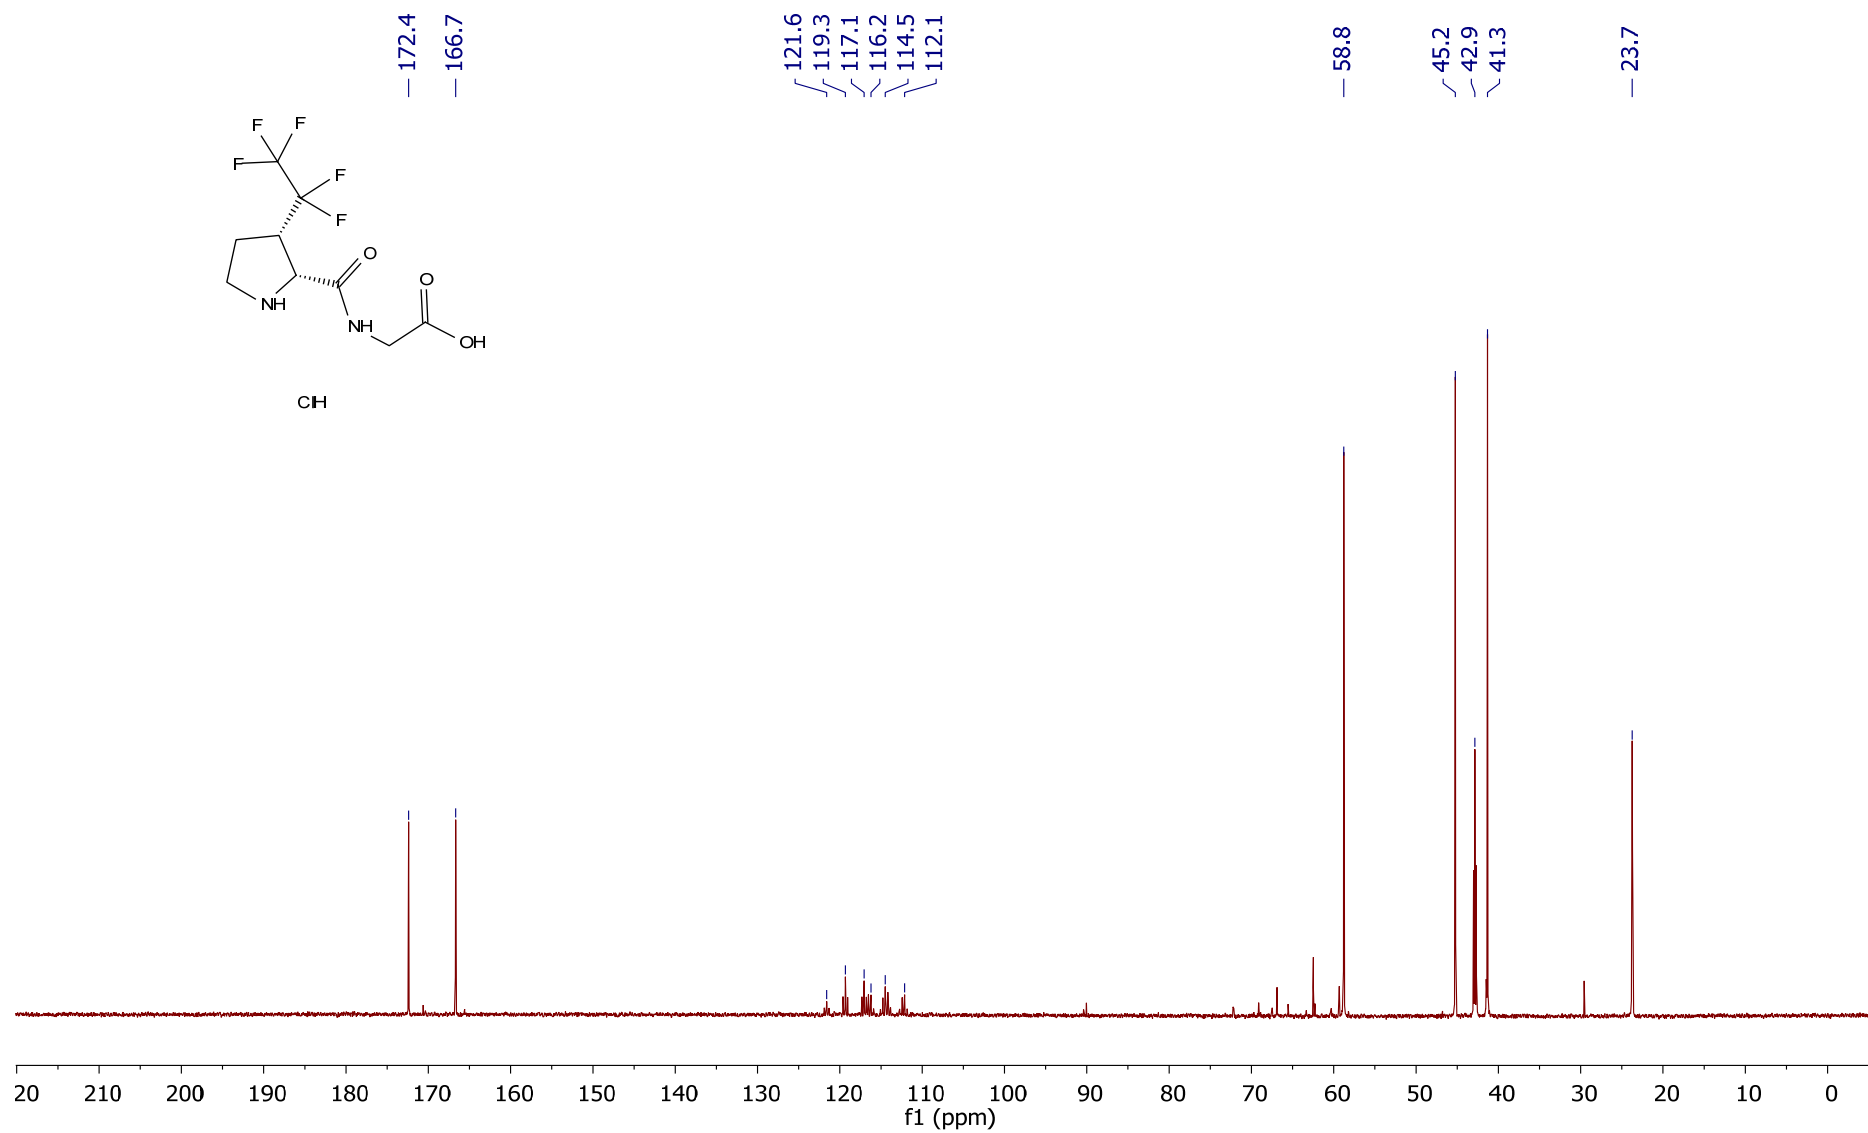

$^{19}\text{F}$  NMR spectrum of the compound (2*R*,3*S*)-**2b** (in  $\text{D}_2\text{O}$ ).

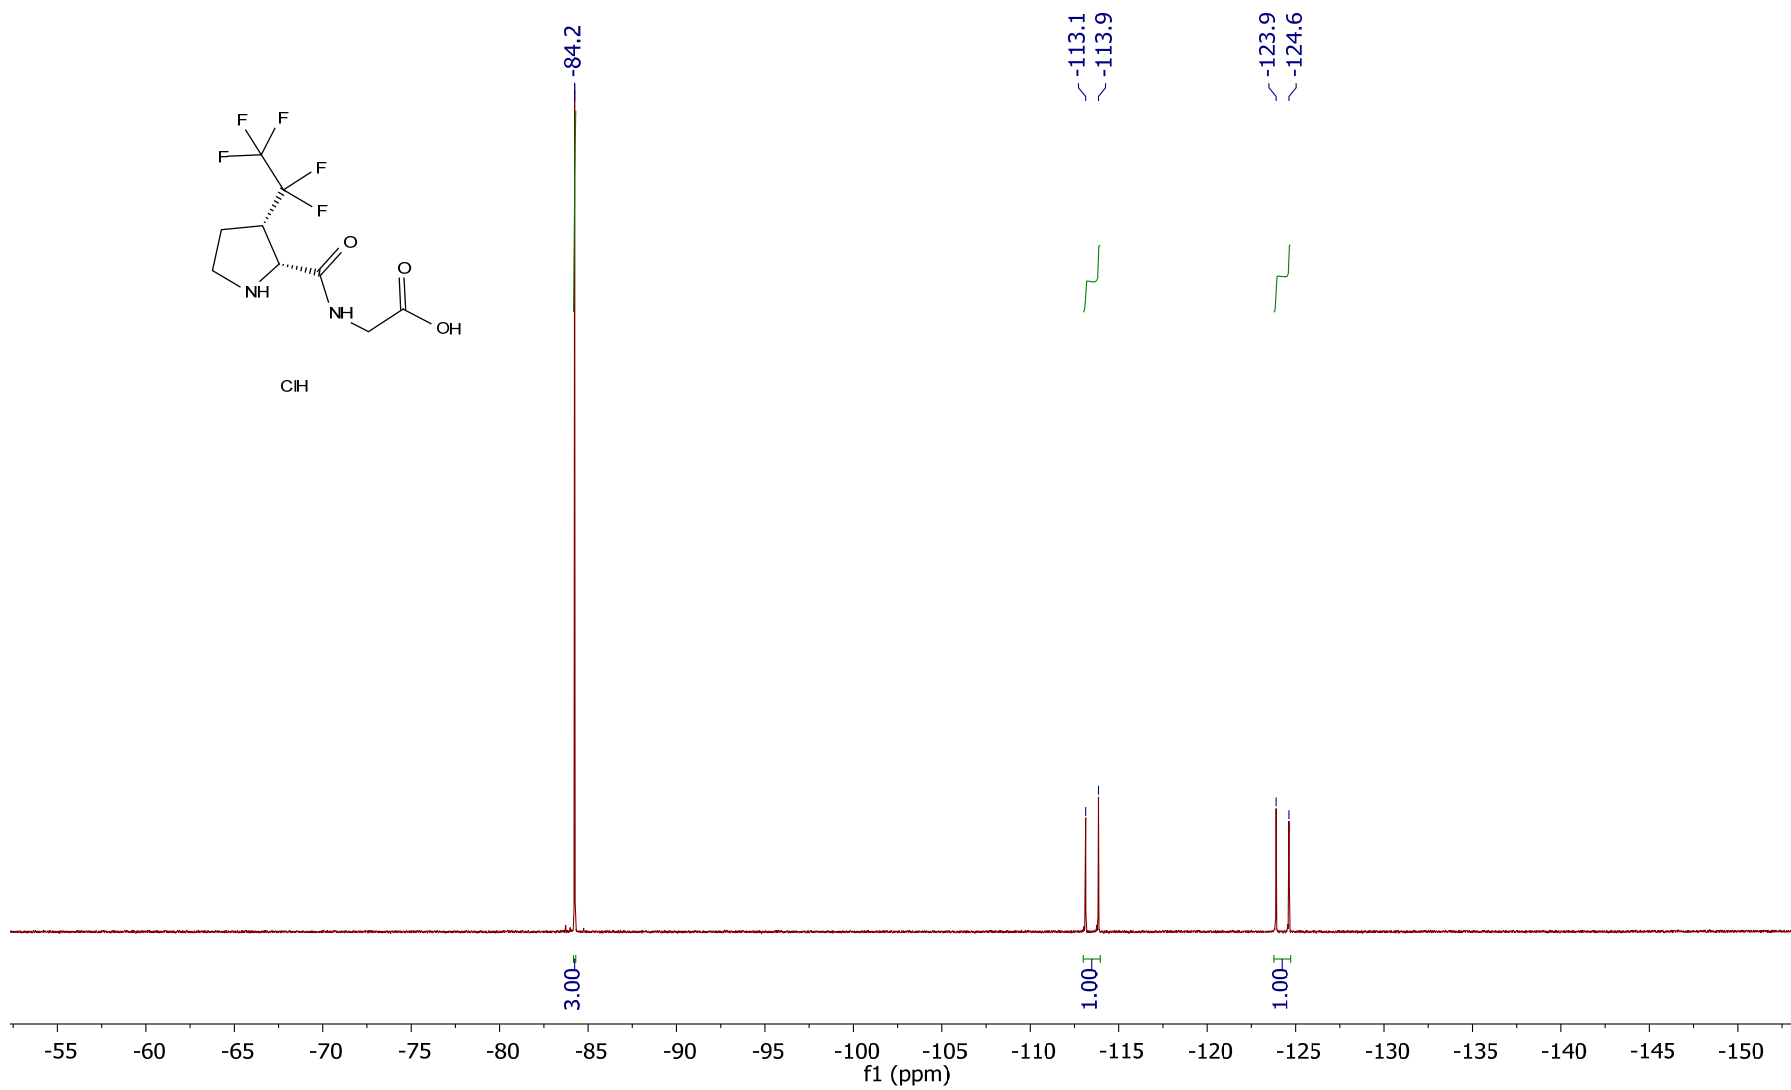

Supplement: d2ob01430k1.pdf [file d2ob01430k1.pdf]
